# Supplementary material for: Optimizing MS-Based Multi-Omics: Comparative Analysis of Protein, Metabolite, and Lipid Extraction Techniques
Source: MDPI journal article supplement (doi:10.3390/metabo14010034), 2024-01-03
Supplement: s1 [file s1]

## Supplementary material

# Optimizing MS -based multi-omics: comparative analysis of protein, metabolite, and lipid extraction techniques

Jeong-Hun Mok, ‡<sup>a</sup> Minjoong Joo, ‡<sup>b</sup> Seonghyeon Cho,<sup>b</sup> Van-An Duong,<sup>c</sup> Haneul Song,<sup>c</sup> Jong-Moon Park<sup>\*b</sup> and Hookeun Lee<sup>\*c</sup>

---

<sup>a</sup>. Department of Medical Device Management and Research, SAIHST, Sungkyunkwan University, 115, Irwon-ro, Gangnam-gu, Seoul (06355), Republic of Korea. Email: jeonghunmok@naver.com (J.-H.M.)

<sup>b</sup>. Basilbiotech, 157-20, Sinsong-ro, Yeonsu-gu, Incheon 22002, Republic of Korea; [mjjoo@basilbiotech.com](mailto:mjjoo@basilbiotech.com) (M.J.); [shcho@basilbiotech.com](mailto:shcho@basilbiotech.com) (S.C.); [basil@basilbiotech.com](mailto:basil@basilbiotech.com) (J.-M.P.)

<sup>c</sup>. College of Pharmacy, Gachon University, 191, Hambangmoe-ro, Yeonsu-gu, Incheon 21936, Republic of Korea; Email: [anduong@gachon.ac.kr](mailto:anduong@gachon.ac.kr) (V.-A.D.); [202240509@gachon.ac.kr](mailto:202240509@gachon.ac.kr) (H.S.); [hklee@gachon.ac.kr](mailto:hklee@gachon.ac.kr) (H.L.)

\*These authors contributed equally.

## Table of Content

**Figure S1.** Chromatogram of proteomics data of each method.

**Figure S2.** List of the number of metabolite features, compounds identified as level of confidence 2,3 for each extraction method

**Figure S3.** Histogram for RSD of each method(metabolite).

**Figure S4.** Chromatogram of metabolomics data of each method.

**Figure S5.** ID grade graph for each extraction method of lipids identified by lipid search. (ID Quality filter- Grade A : Lipid of which fatty acid chains and class were identified completely./ Grade B : Lipid of which class and some fatty acid chains were identified./Grade C : Lipid of which class or fatty acid was identified./Grade D : other)

**Figure S6.** Chromatogram of lipidomics data of each method.

**Figure S7.** Number of missed cleavages in identified peptides. (A) FASP\_80methanol, (B) FASP\_Chloroform/methanol, (C) FASP\_MTBE, (D) S-trap\_80methanol, (E) S-trap\_Chloroform/methanol , (F) S-trap\_MTBE

**Figure S8.** Correlation scatter plot in proteomics data

**Figure S9.** Histogram of pI(isoelectric points)

**Figure S10.** Histograms and cumulative distributions of molecular weight(MW)

**Table S2.** Fold change and p-value of Q71DI3, Q9BW91, Q7Z417

RT: 0.00 - 180.00

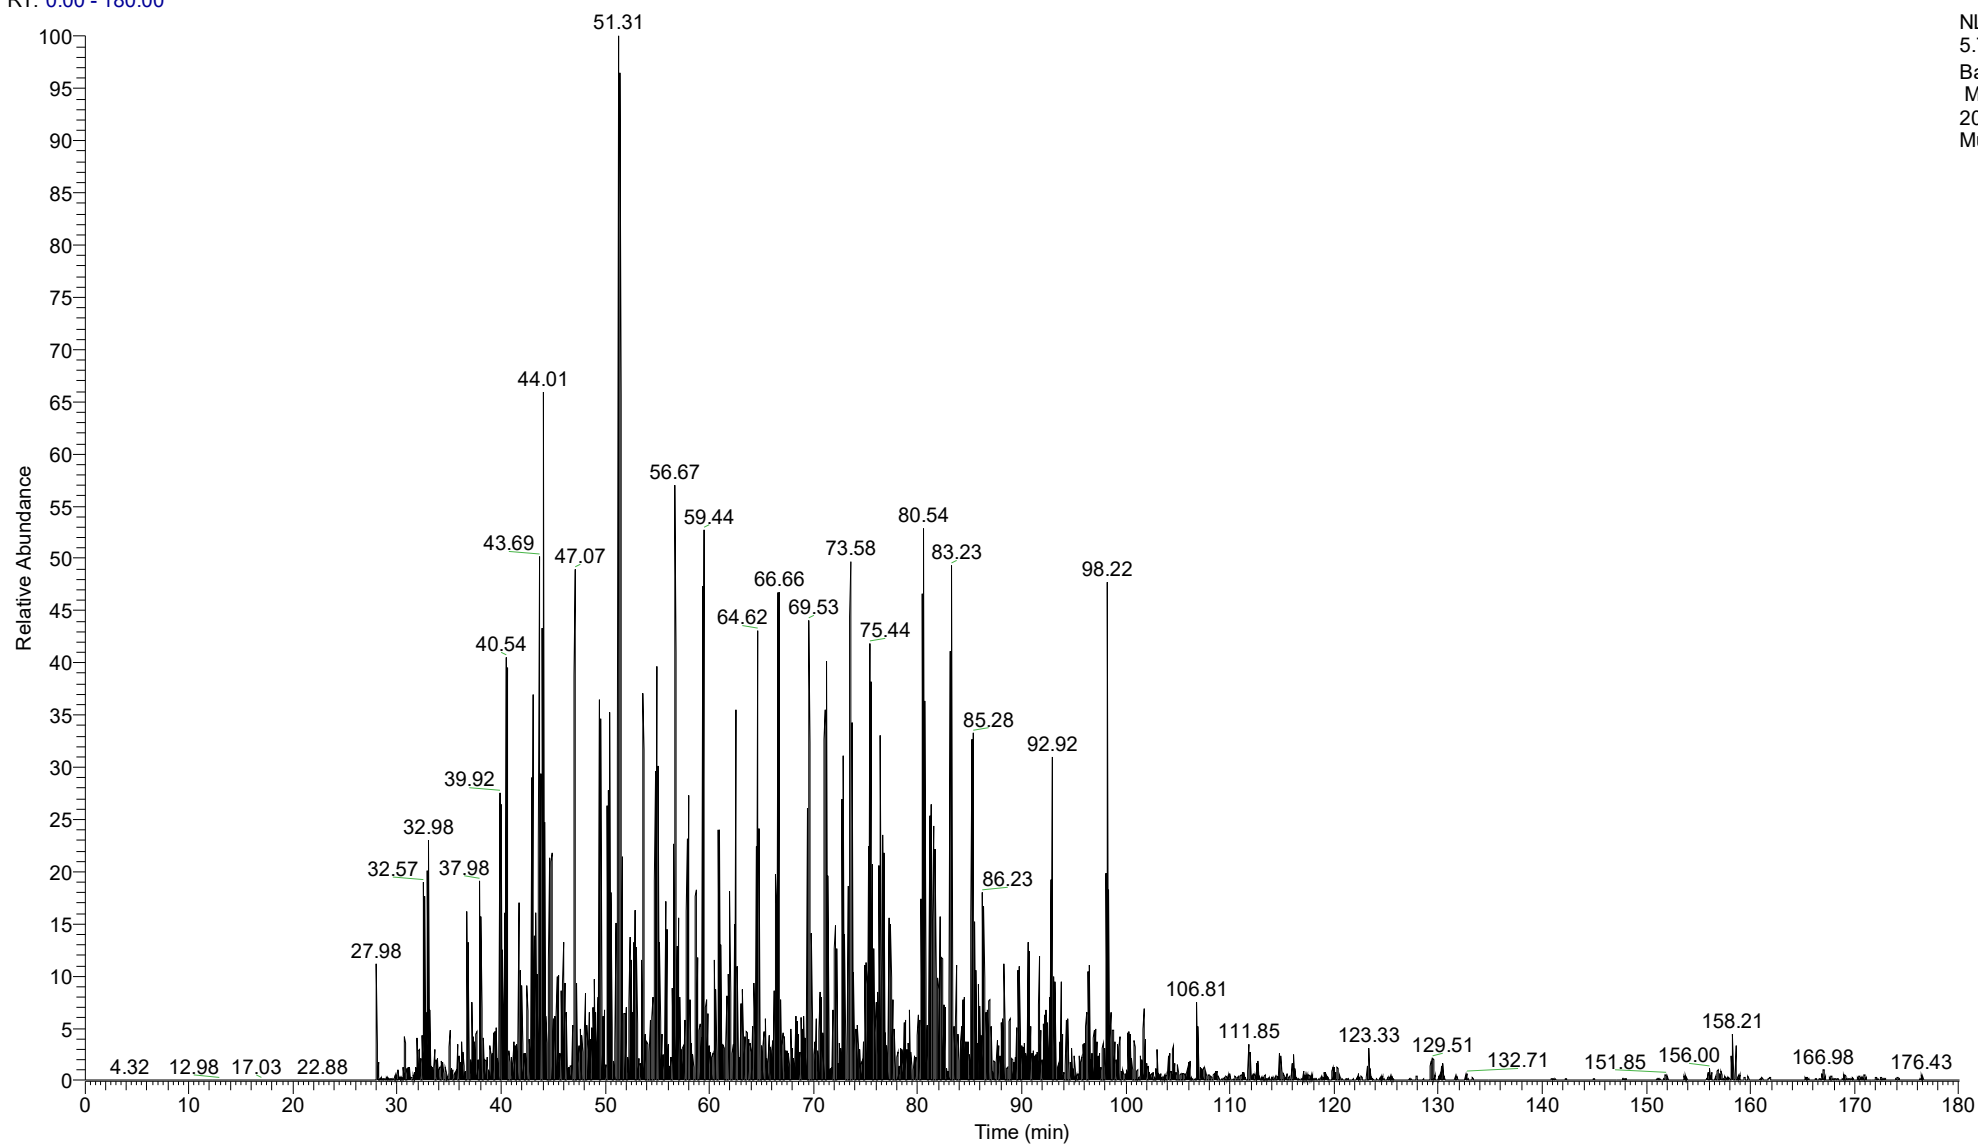

NL:  
5.72E9  
Base Peak  
MS  
20201109\_  
Multi\_S1-1

(A)80%methanol + S-trap-2

RT: 0.00 - 180.00

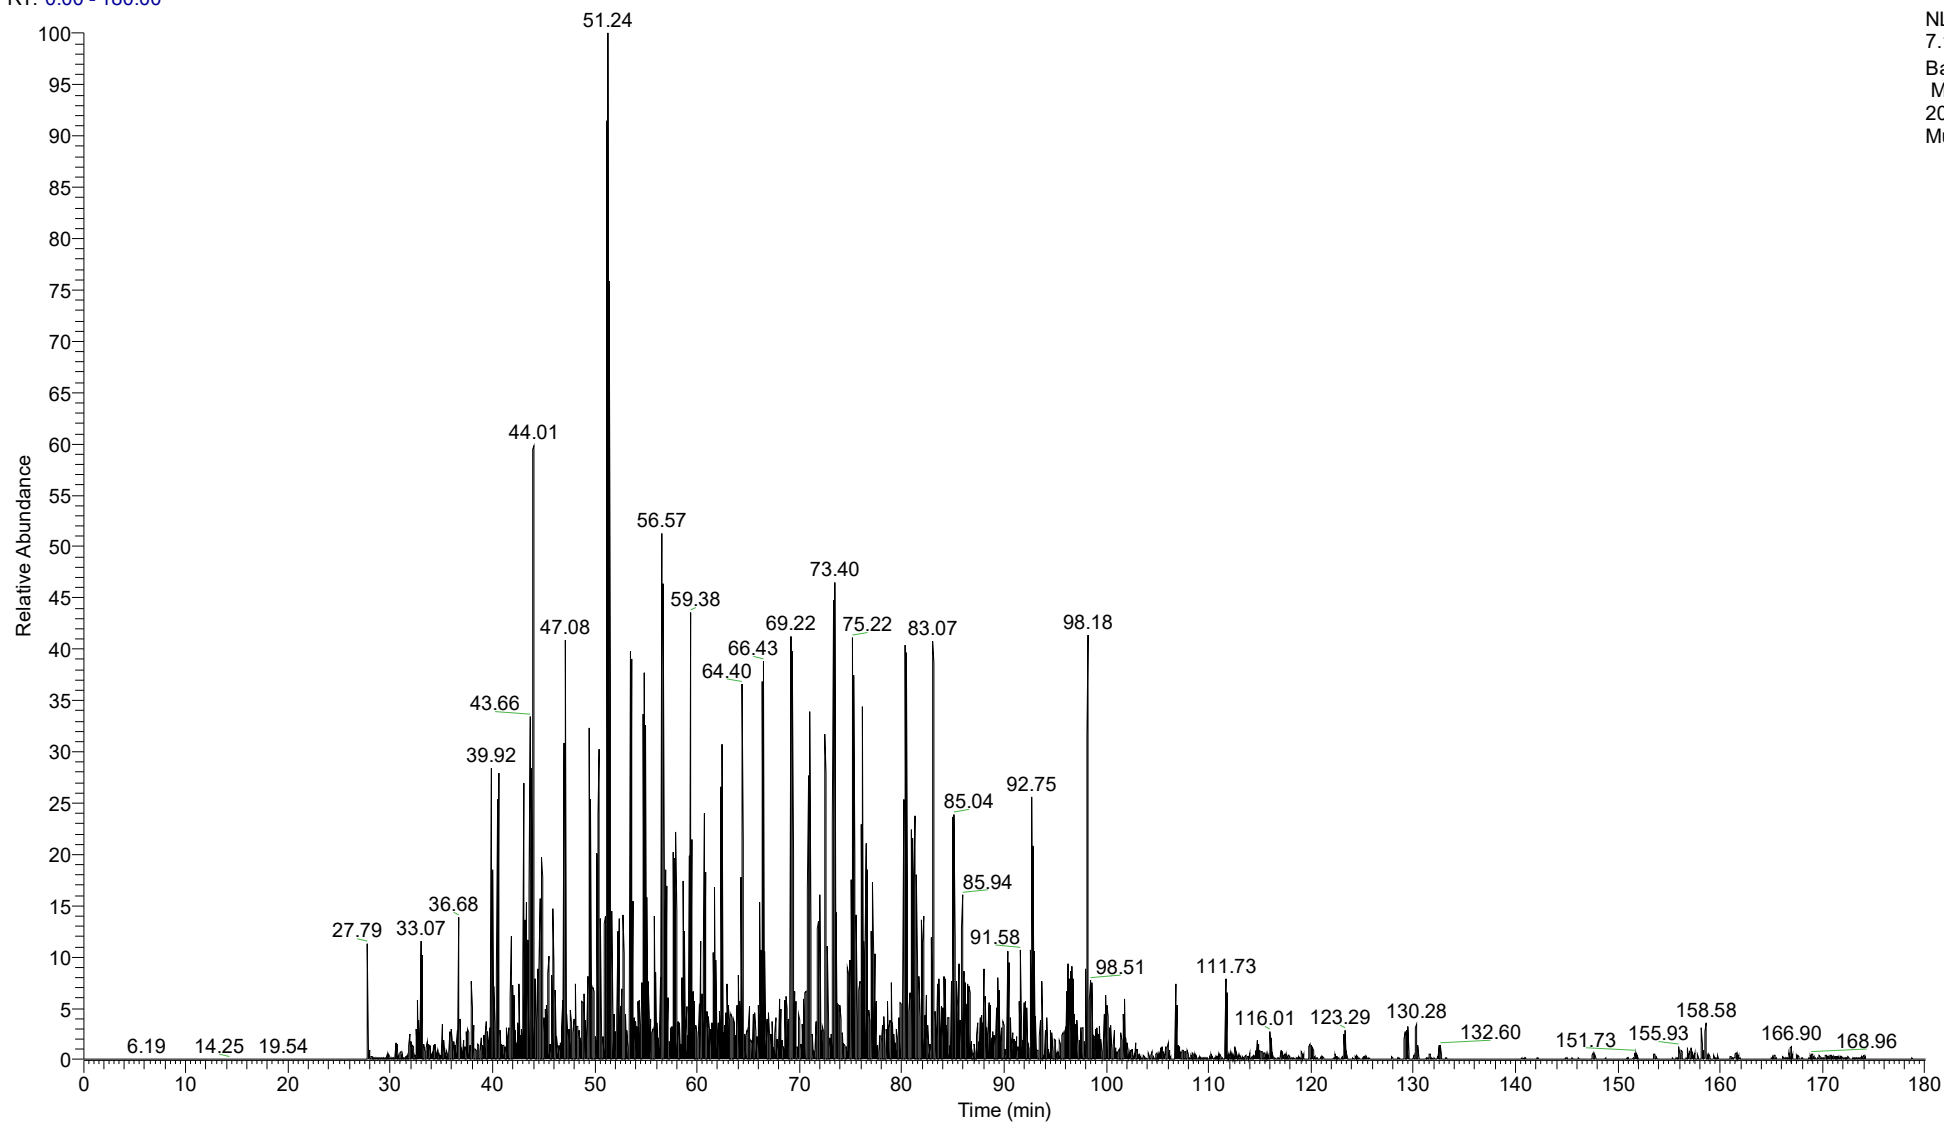

NL:  
7.10E9  
Base Peak  
MS  
20201109\_  
Multi\_S1-2

(A)80%methanol + S-trap-3

RT: 0.00 - 180.00

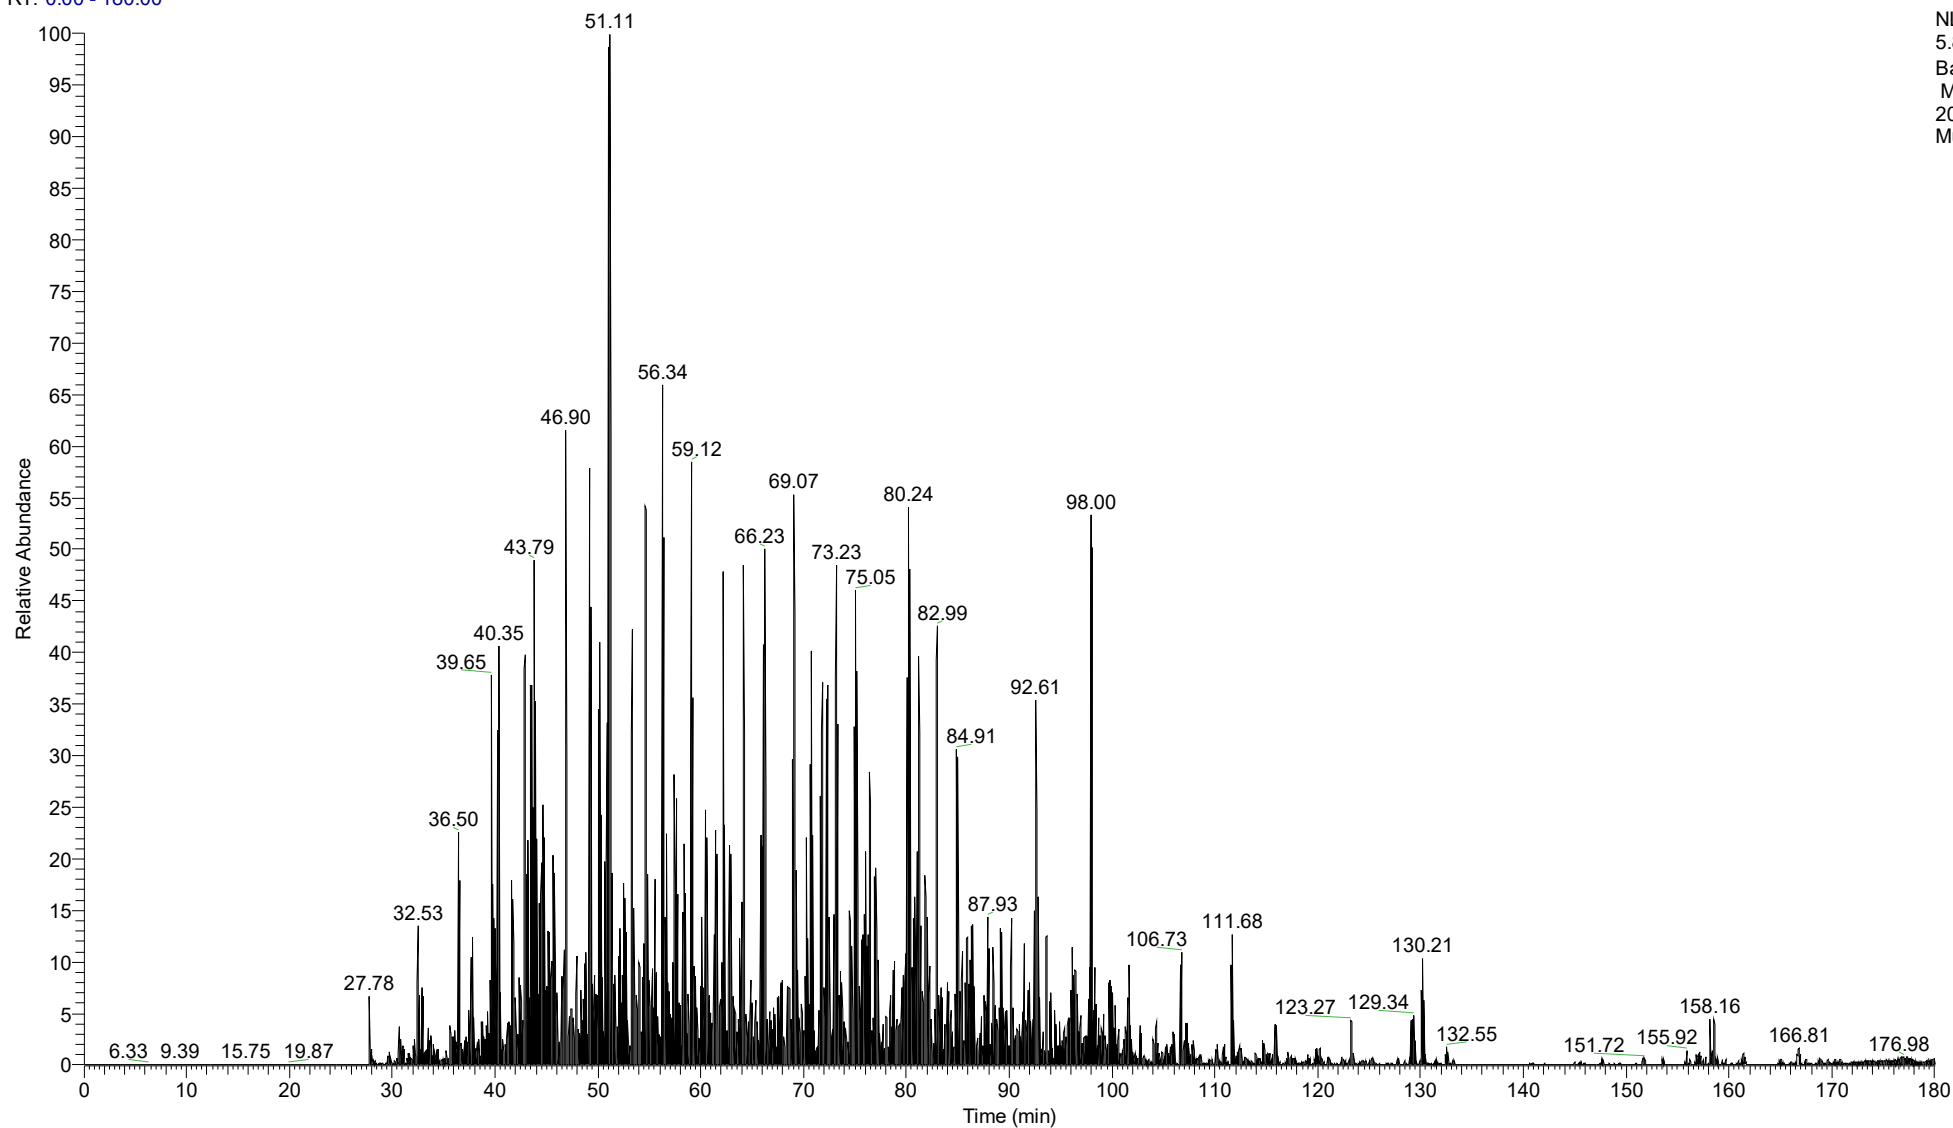

NL:  
5.81E9  
Base Peak  
MS  
20201109\_  
Multi\_S1-3

(B)Chloroform/methanol + S-trap-1

RT: 0.00 - 180.00

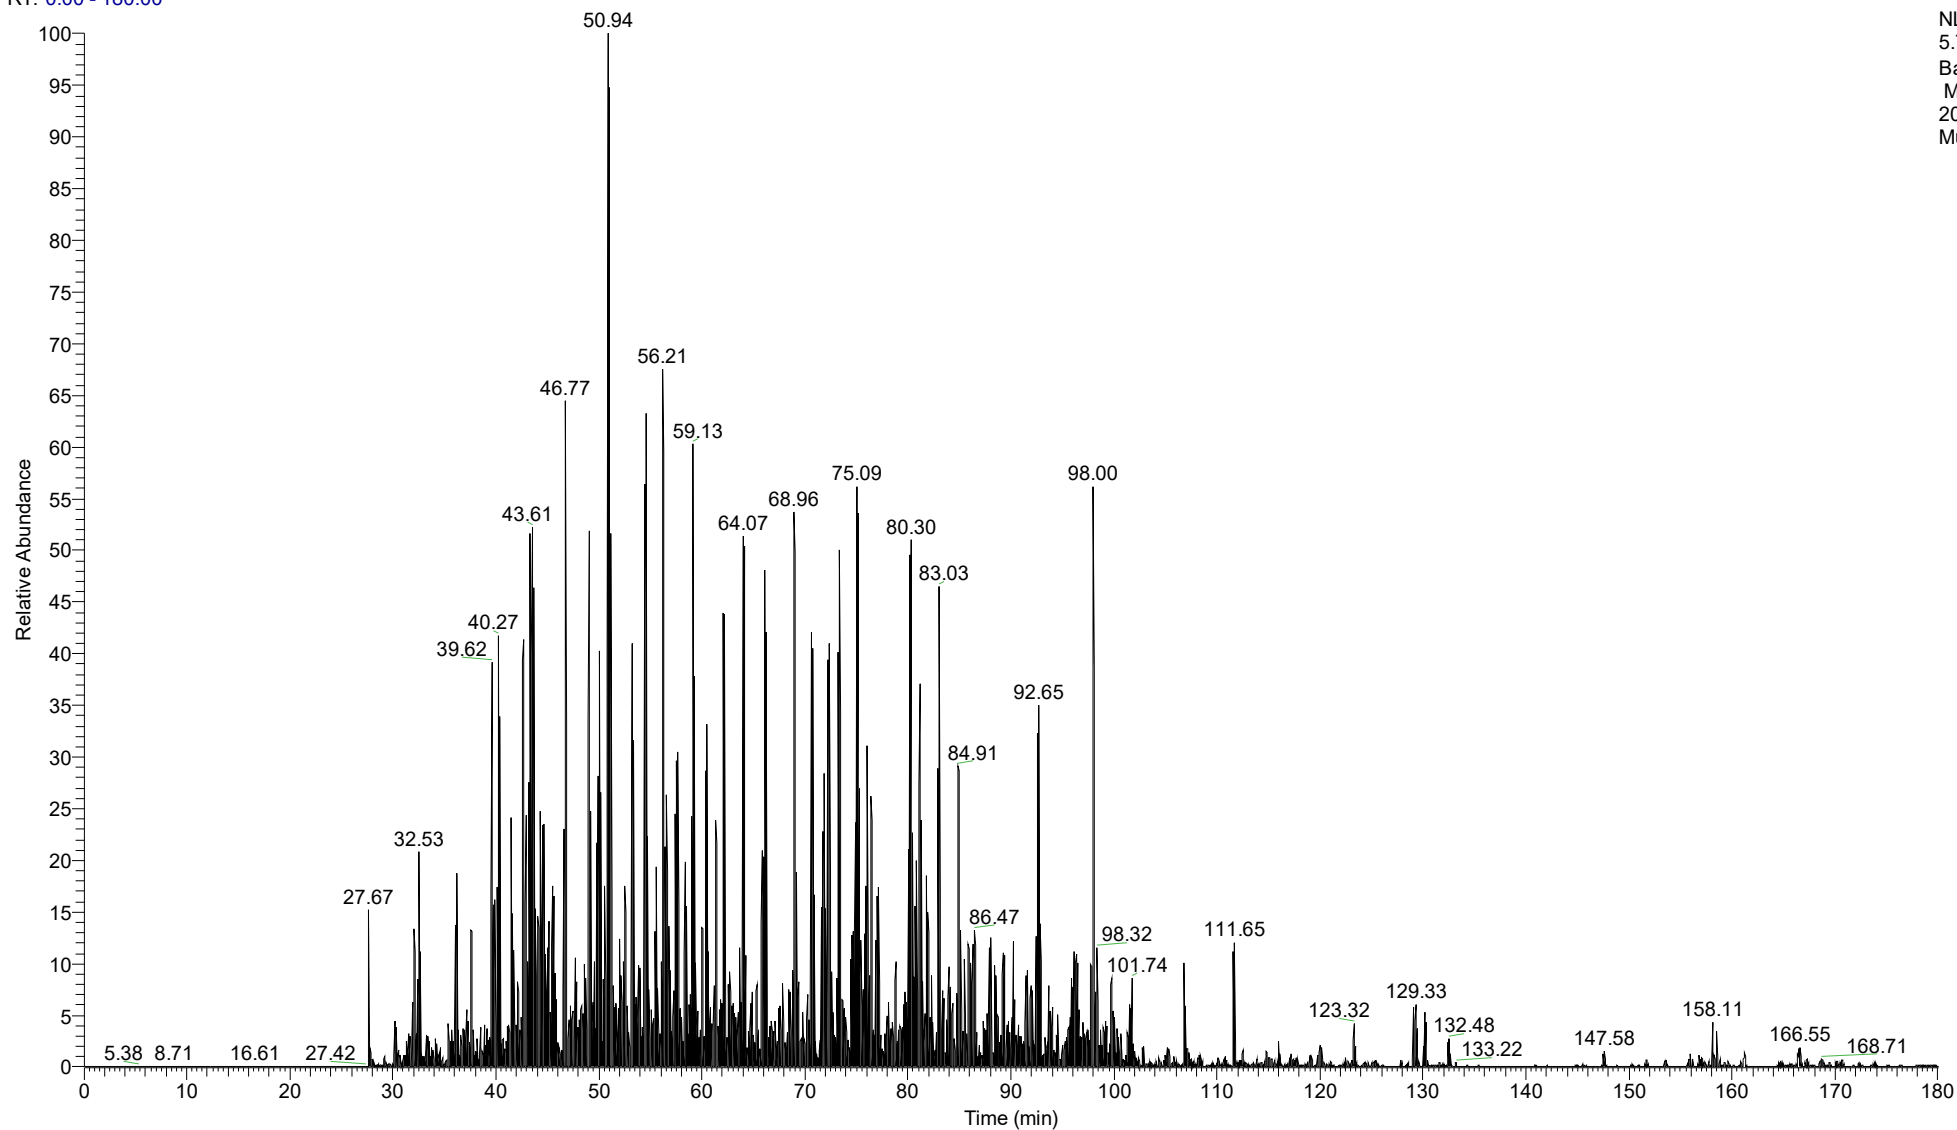

NL:  
5.73E9  
Base Peak  
MS  
20201109\_  
Multi\_S2-1

(B)Chloroform/methanol + S-trap-2

RT: 0.00 - 180.00

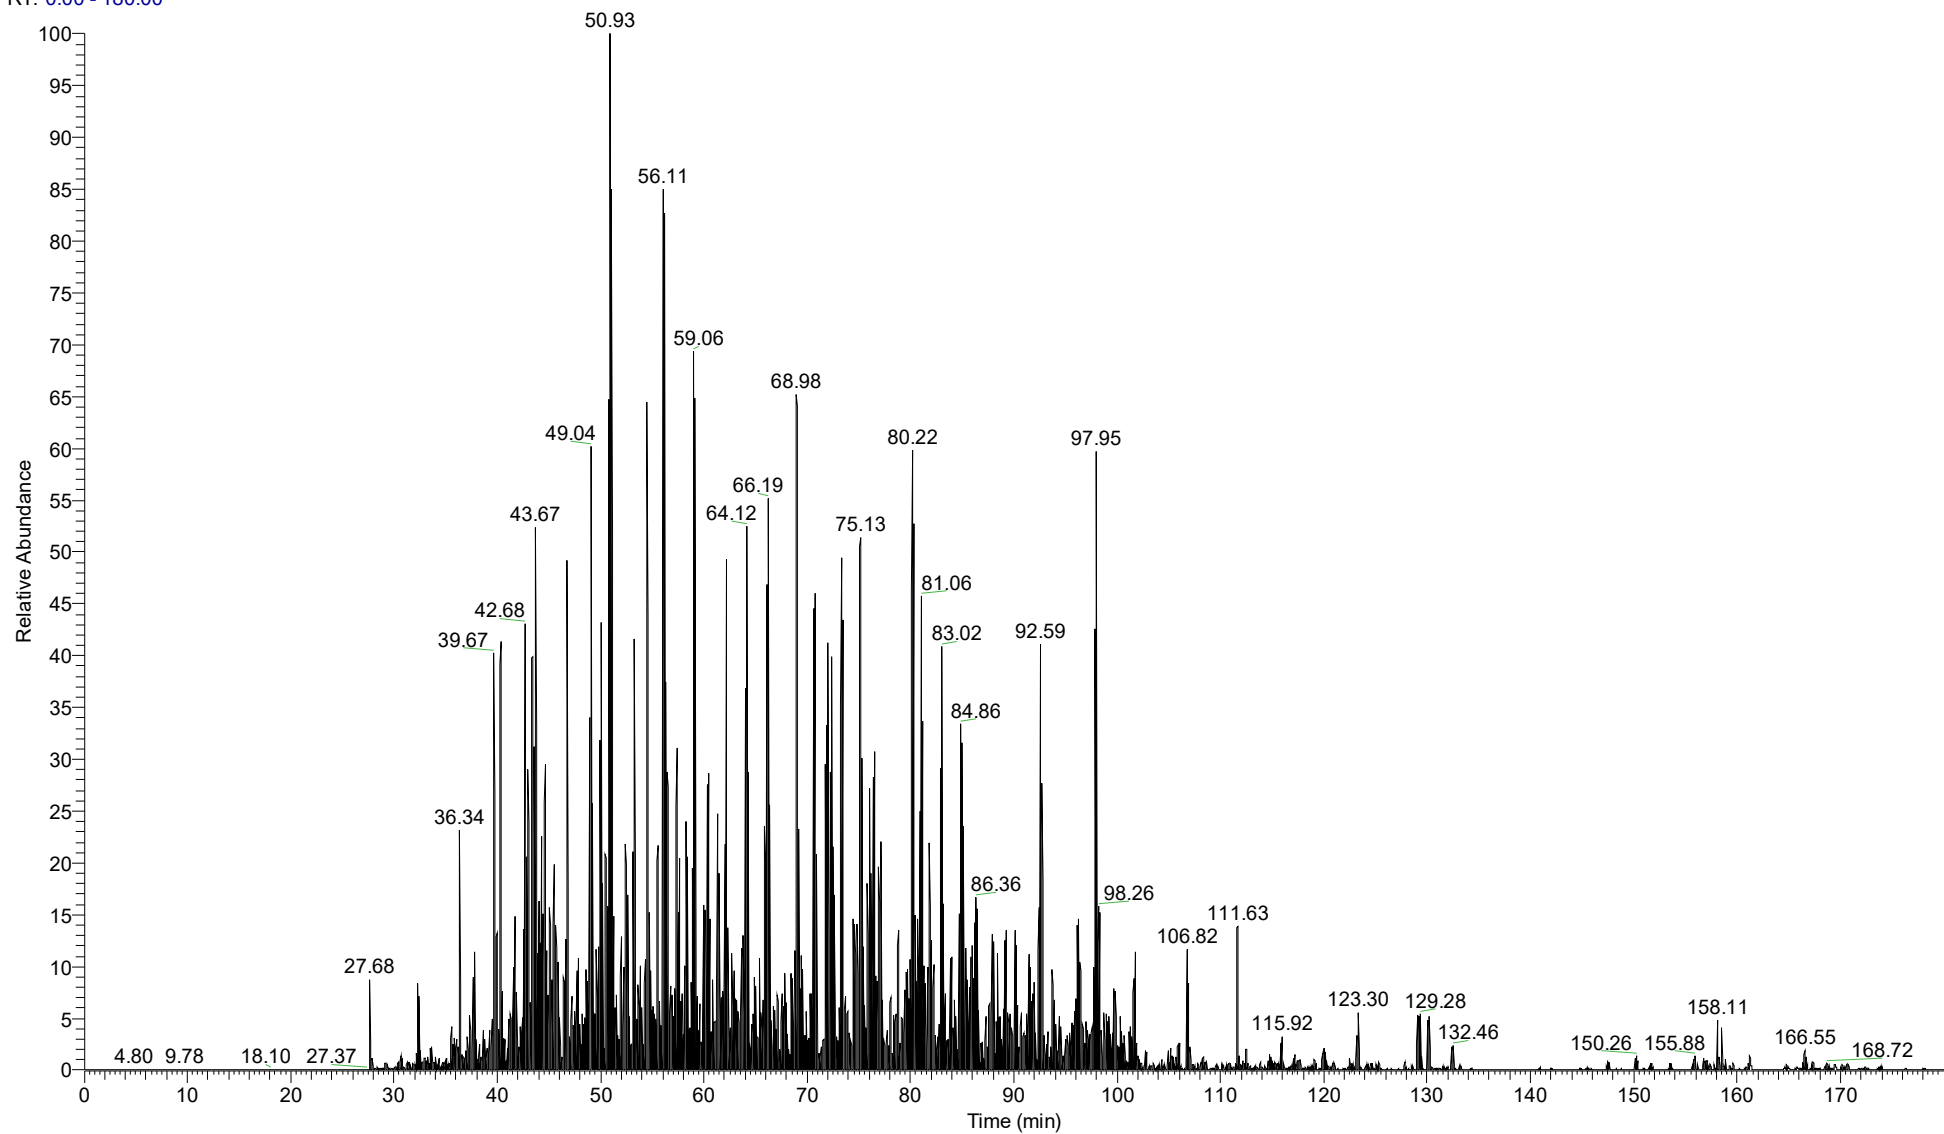

NL:  
5.31E9  
Base Peak  
MS  
20201109\_  
Multi\_S2-2

(B)Chloroform/methanol + S-trap-3

RT: 0.00 - 180.00

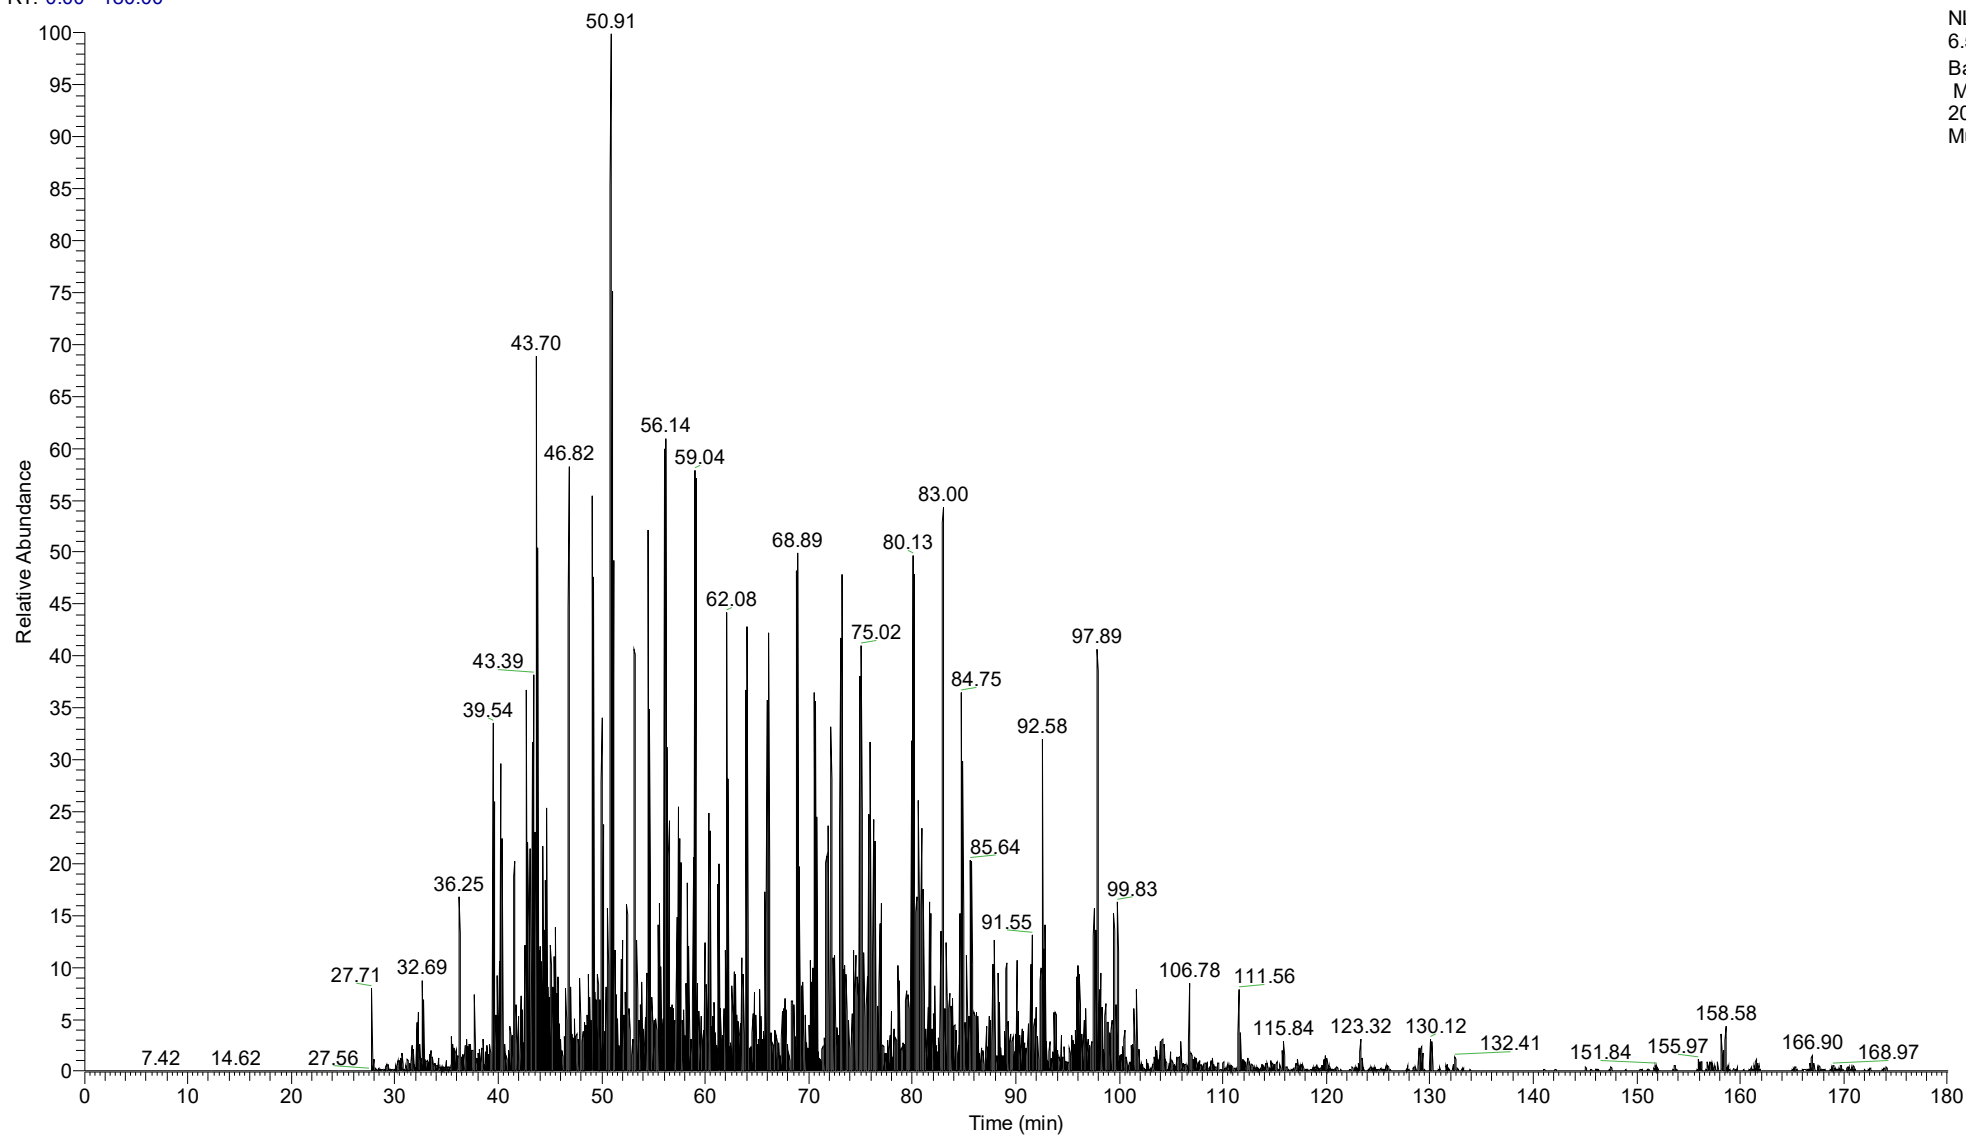

NL:  
6.50E9  
Base Peak  
MS  
20201109\_  
Multi\_S2-3

(C)MTBE + S-trap-1



RT: 0.00 - 180.00

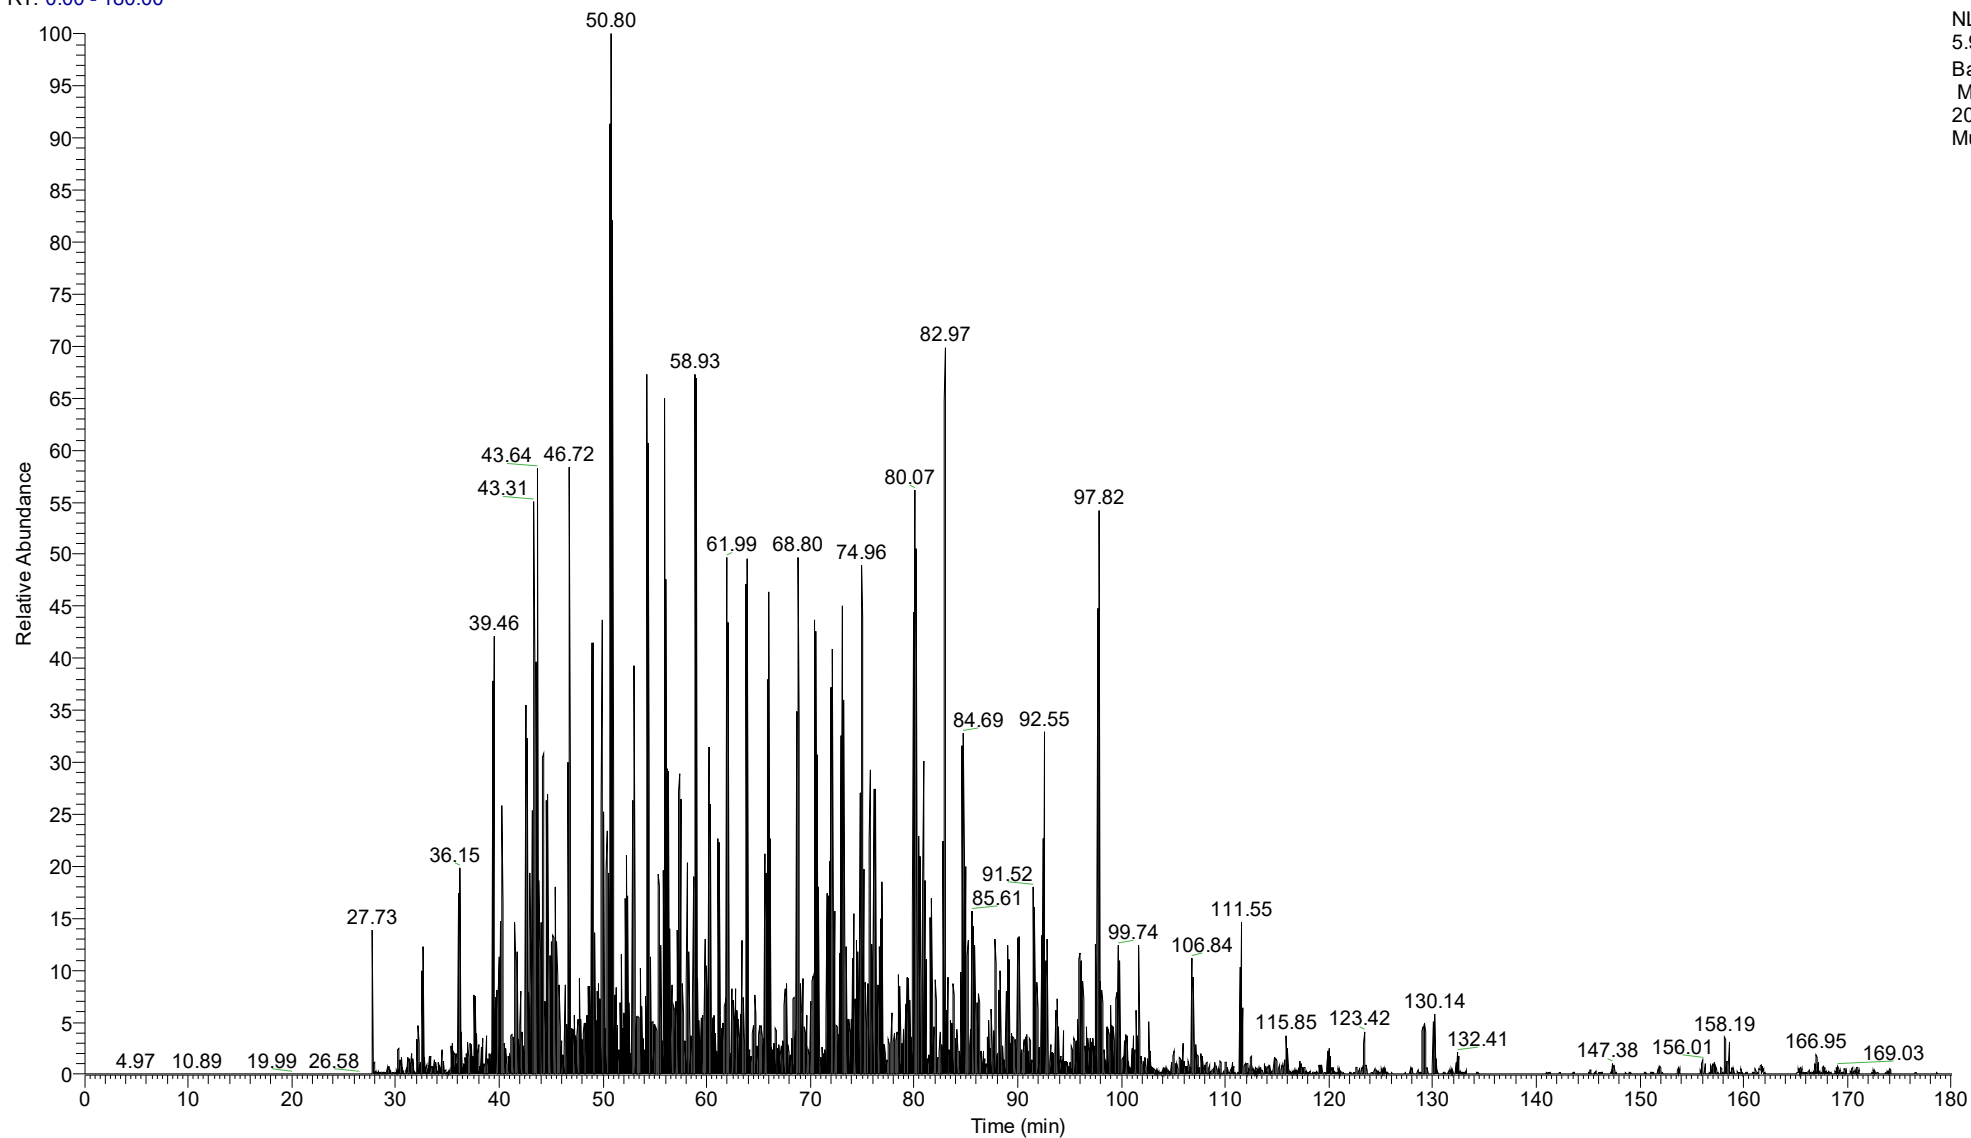

NL:  
5.90E9  
Base Peak  
MS  
20201109\_  
Multi\_S3-1

(C)MTBE + S-trap-2

RT: 0.00 - 180.00

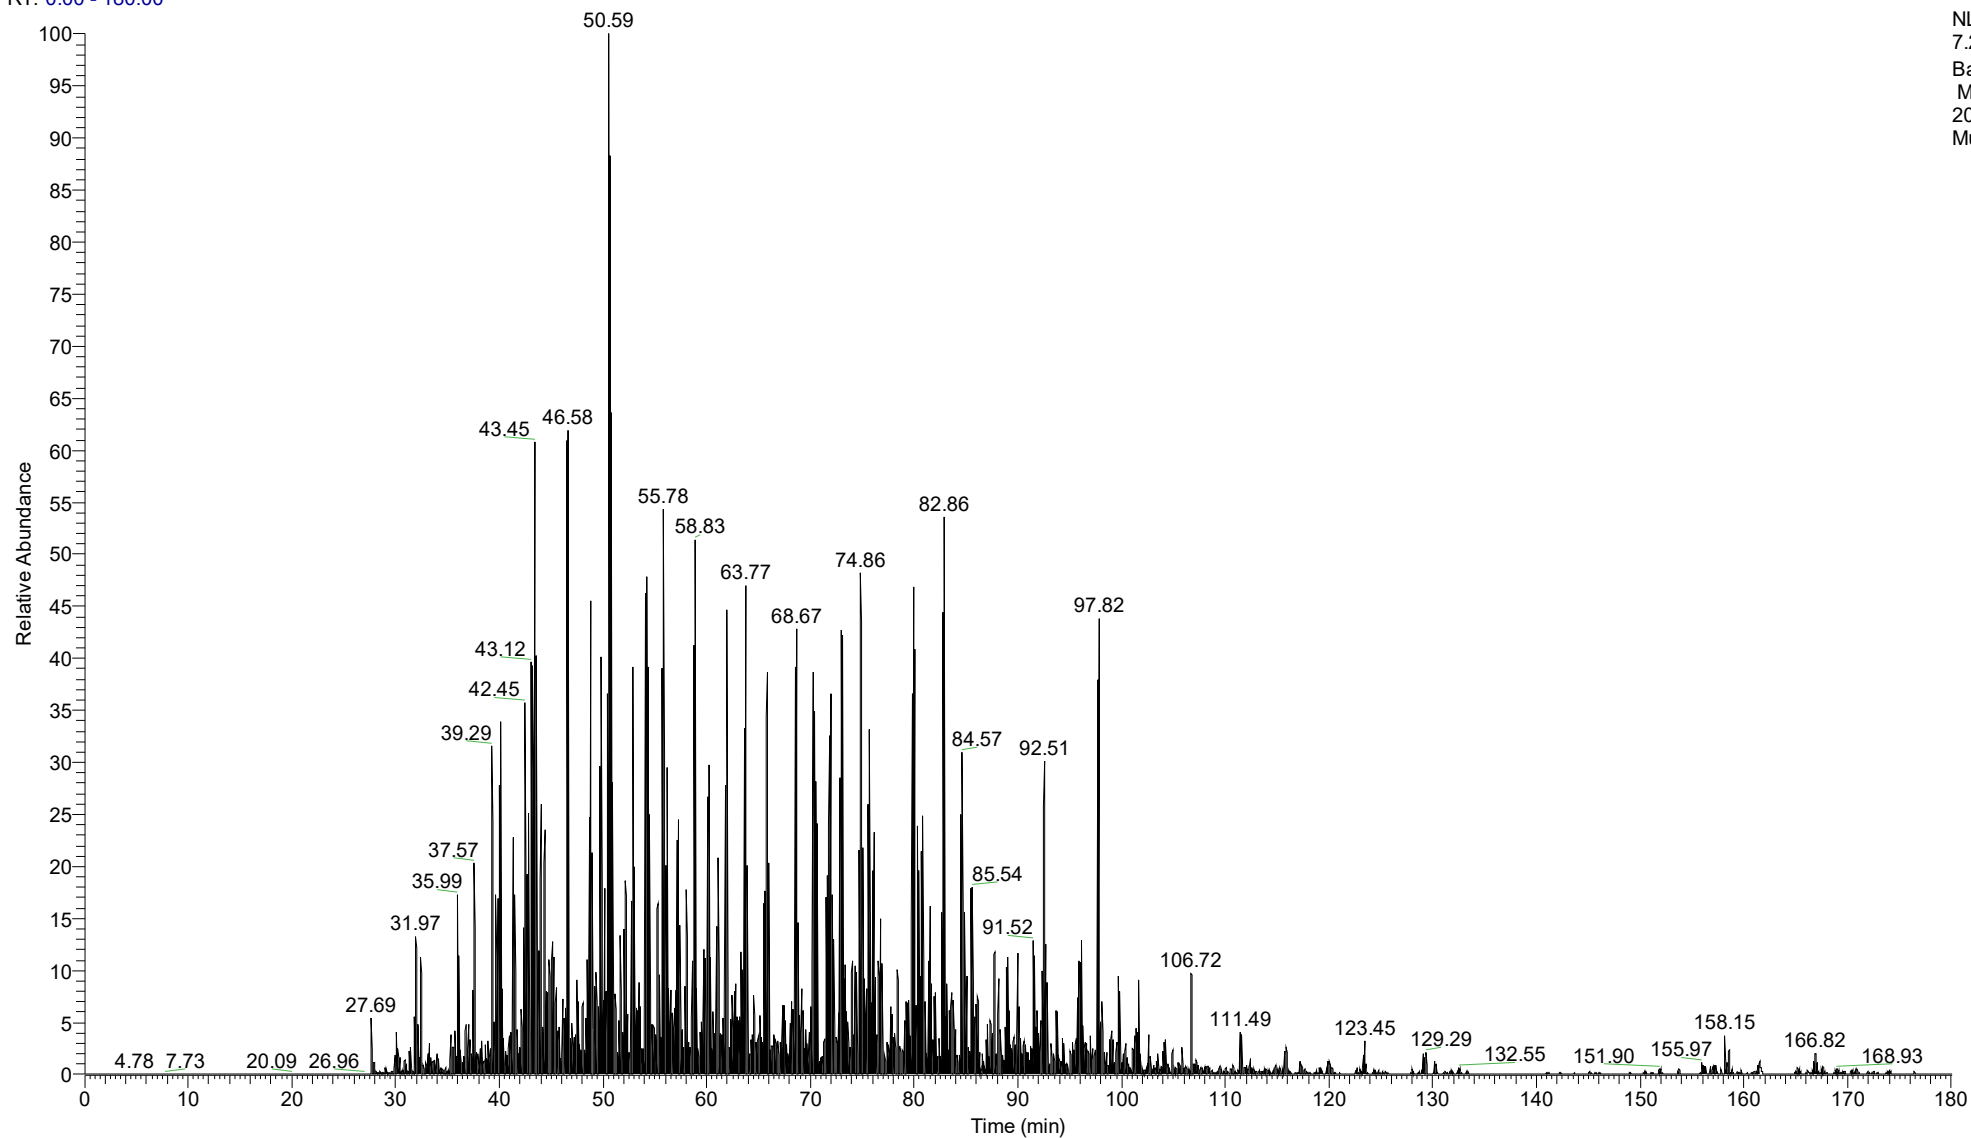

NL:  
7.24E9  
Base Peak  
MS  
20201109\_  
Multi\_S3-2

(C)MTBE + S-trap-3

RT: 0.00 - 180.00

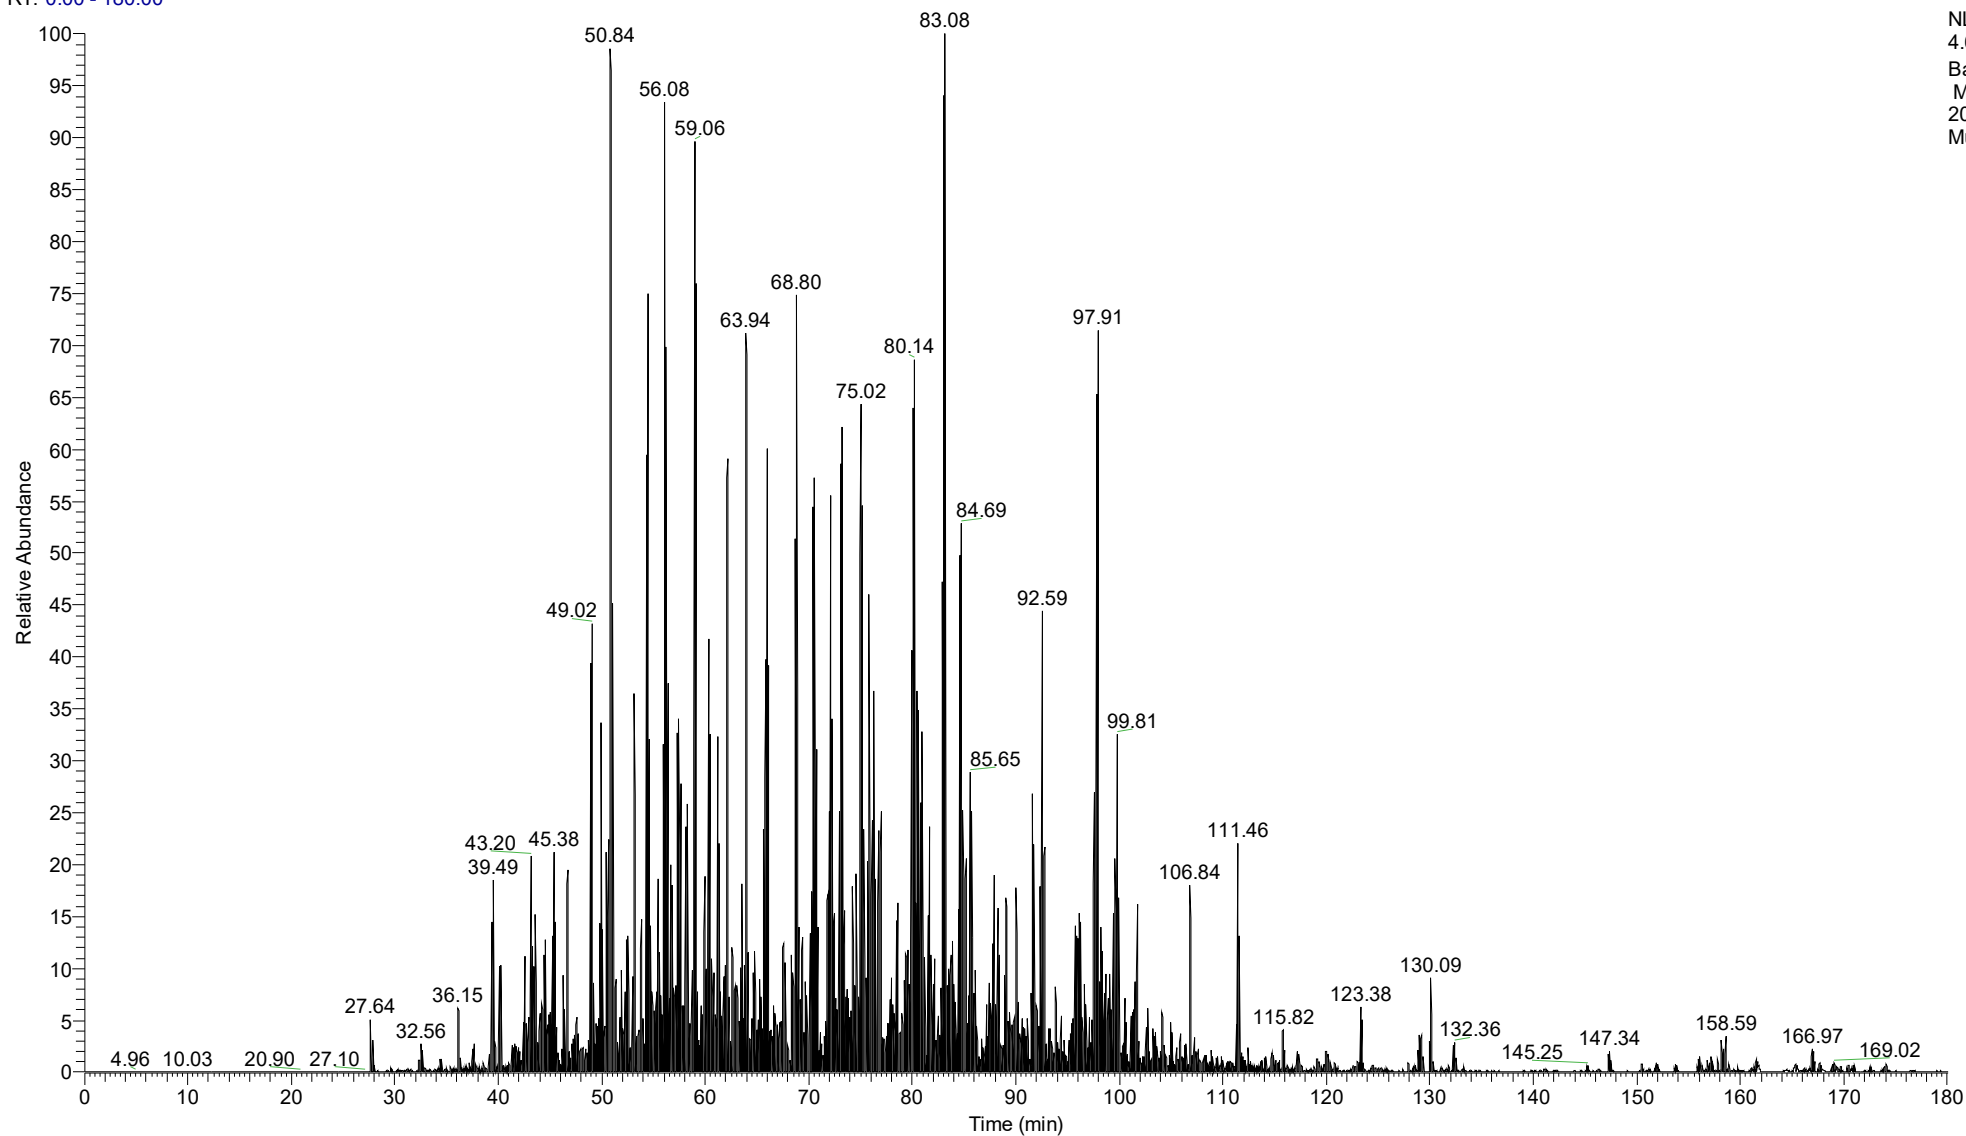

NL:  
4.64E9  
Base Peak  
MS  
20201109\_  
Multi\_S3-3

(D)80%methanol + FASP-1

RT: 0.00 - 180.00

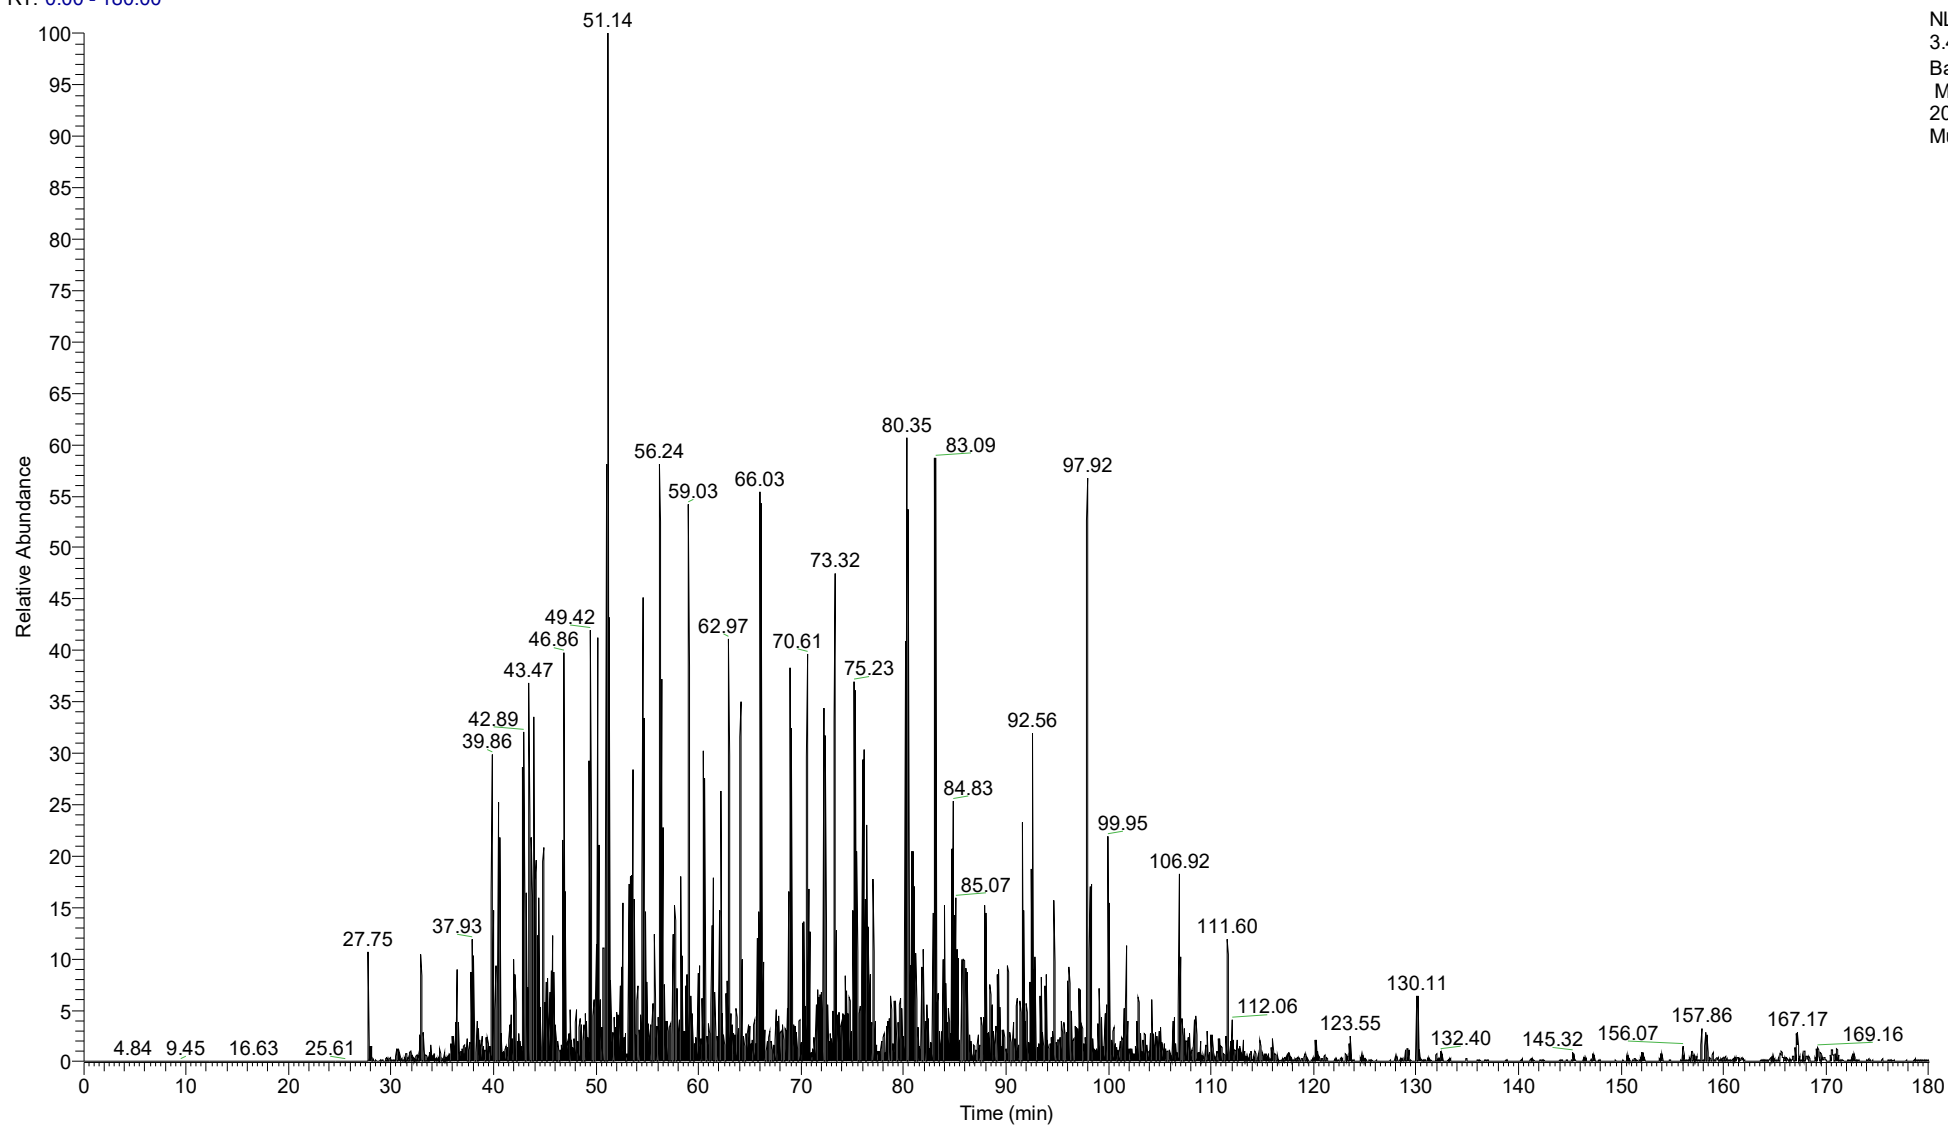

NL:  
3.46E9  
Base Peak  
MS  
20201109\_  
Multi\_P1-1

(D)80%methanol + FASP-2

RT: 0.00 - 180.00

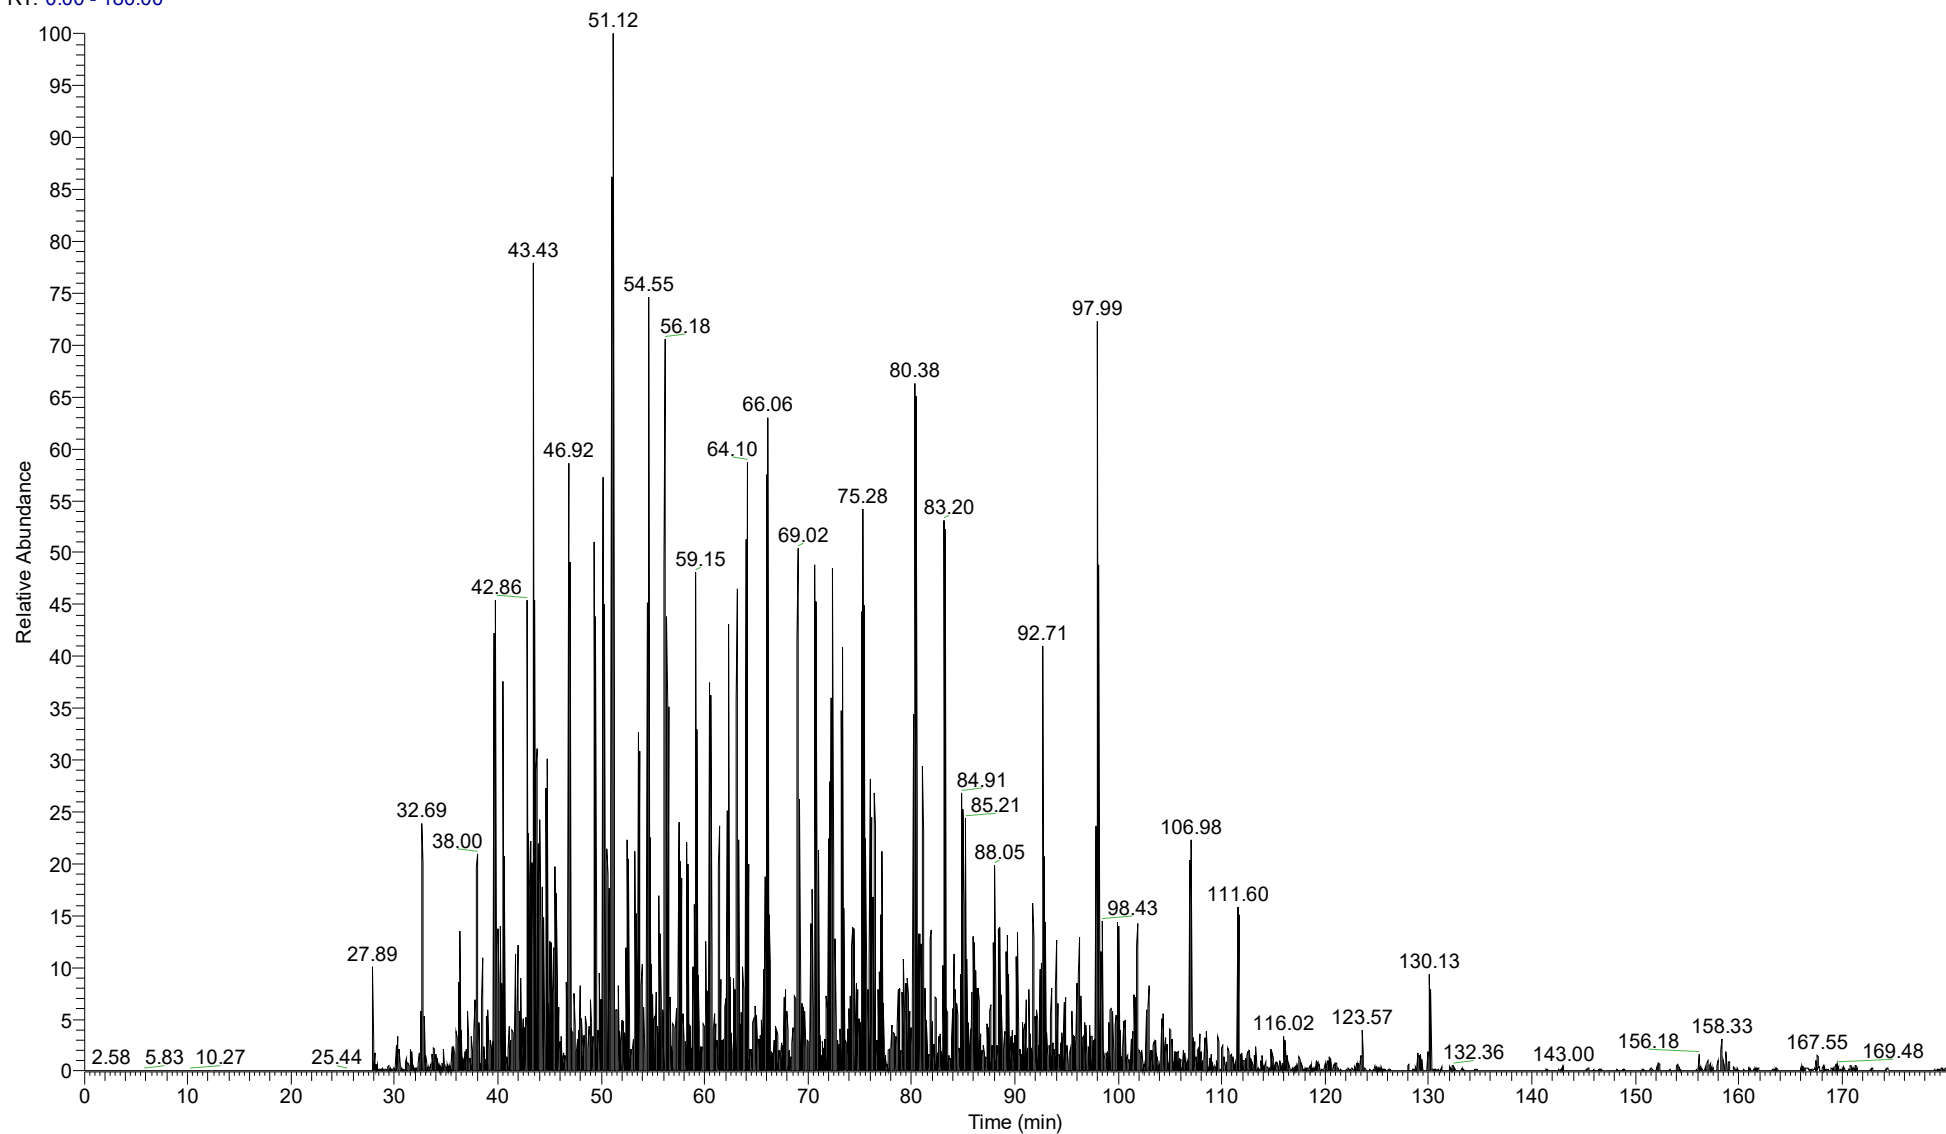

NL:  
4.24E9  
Base Peak  
MS  
20201109\_  
Multi\_P1-2

(D)80%methanol + FASP-3

RT: 0.00 - 180.00

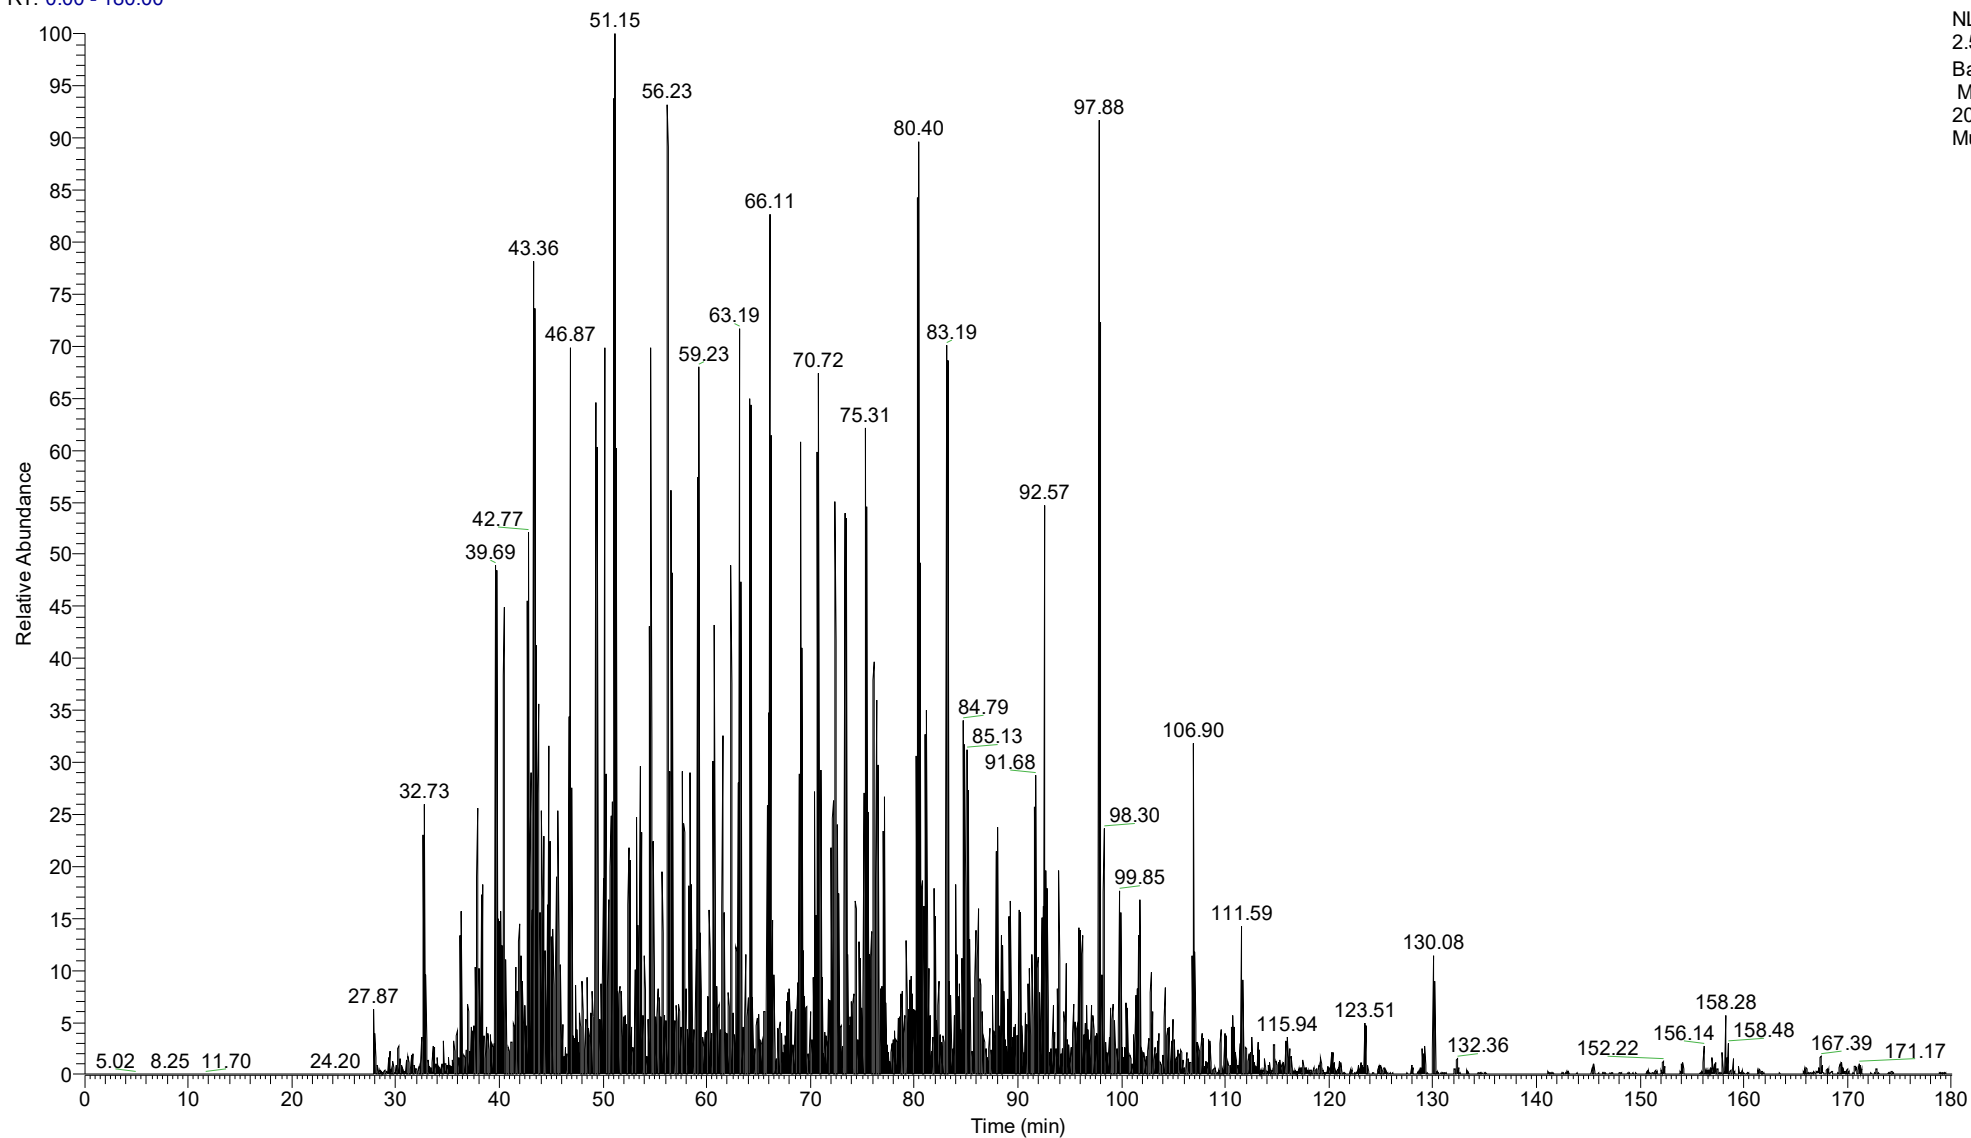

NL:  
2.55E9  
Base Peak  
MS  
20201109\_  
Multi\_P1-3

(E)Chloroform/methanol + FASP-1

RT: 0.00 - 180.01

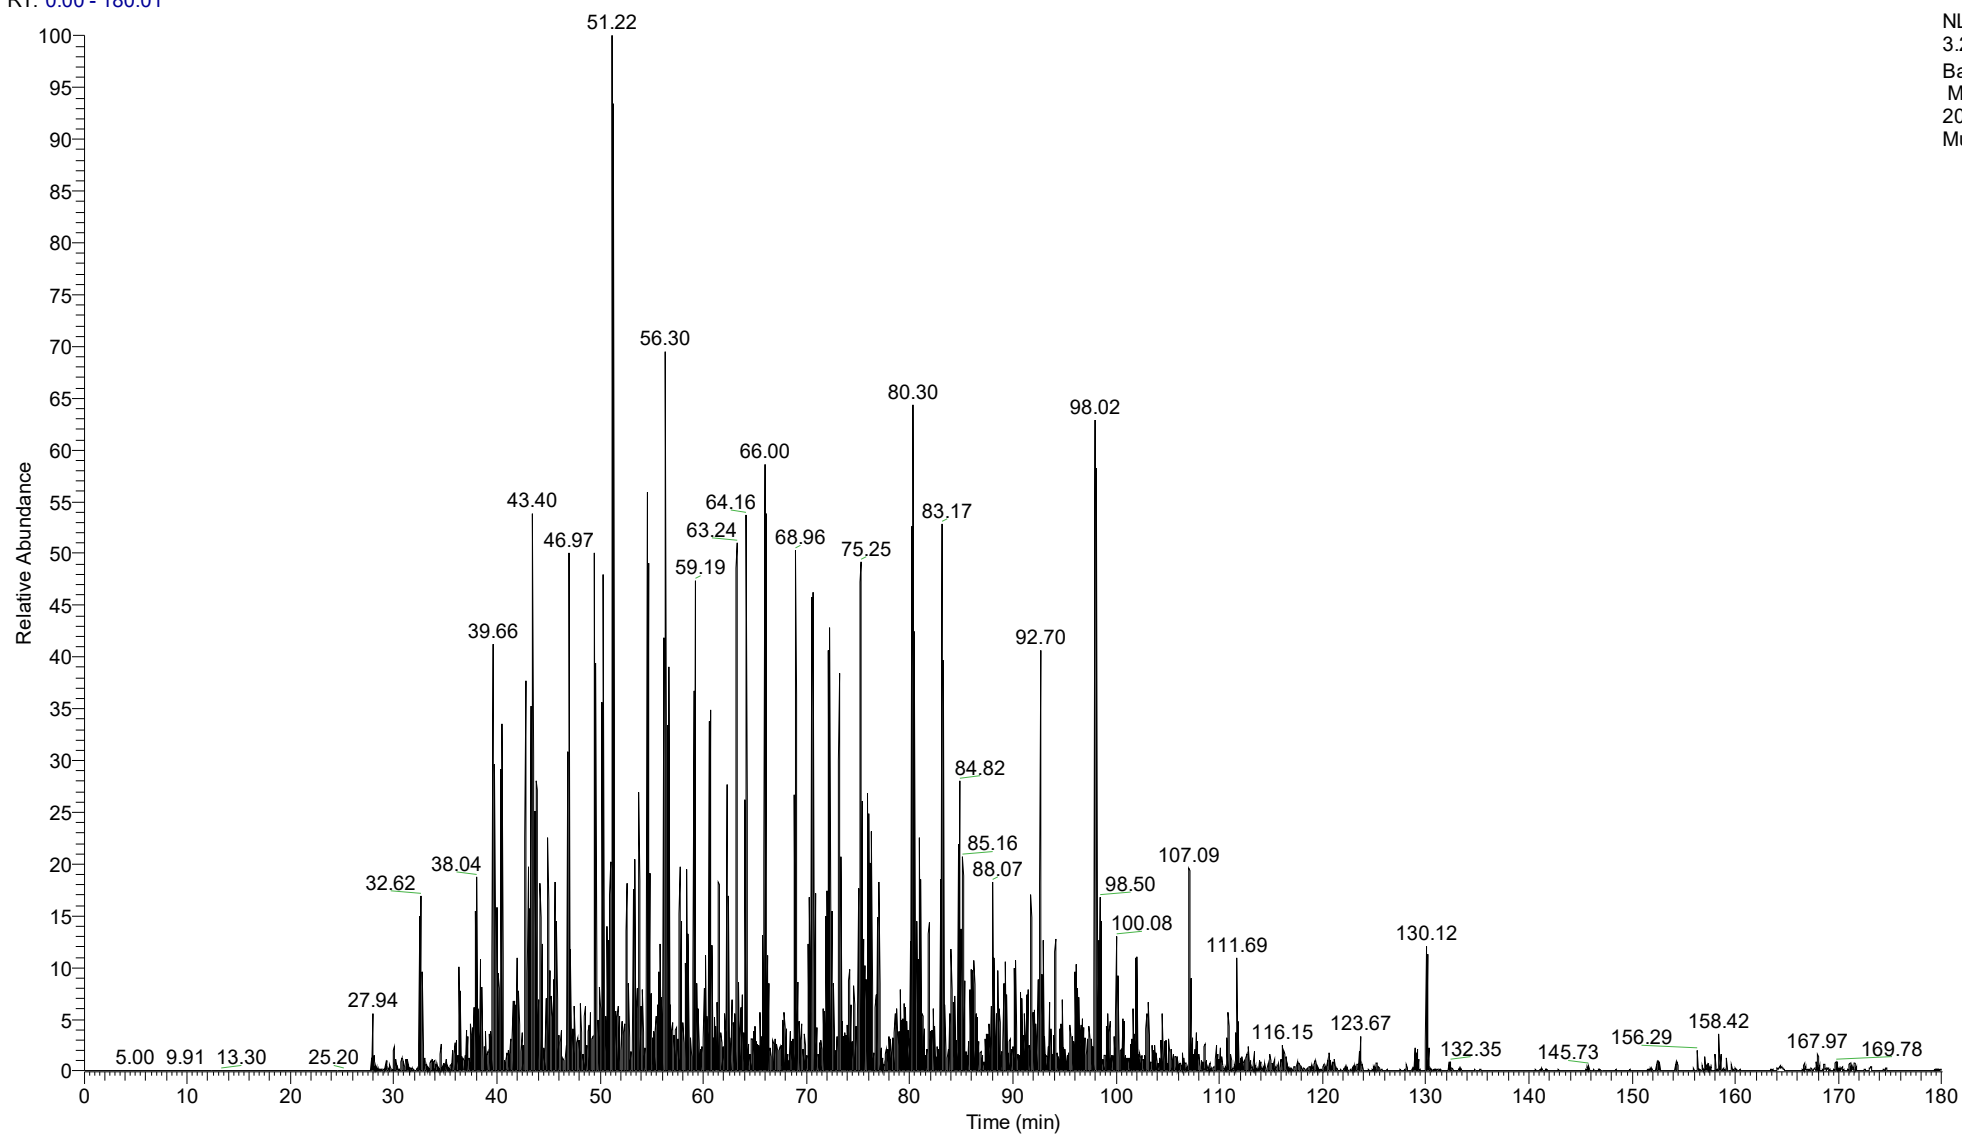

NL:  
3.23E9  
Base Peak  
MS  
20201109\_  
Multi\_P2-1

(E)Chloroform/methanol + FASP-2

RT: 0.00 - 180.00

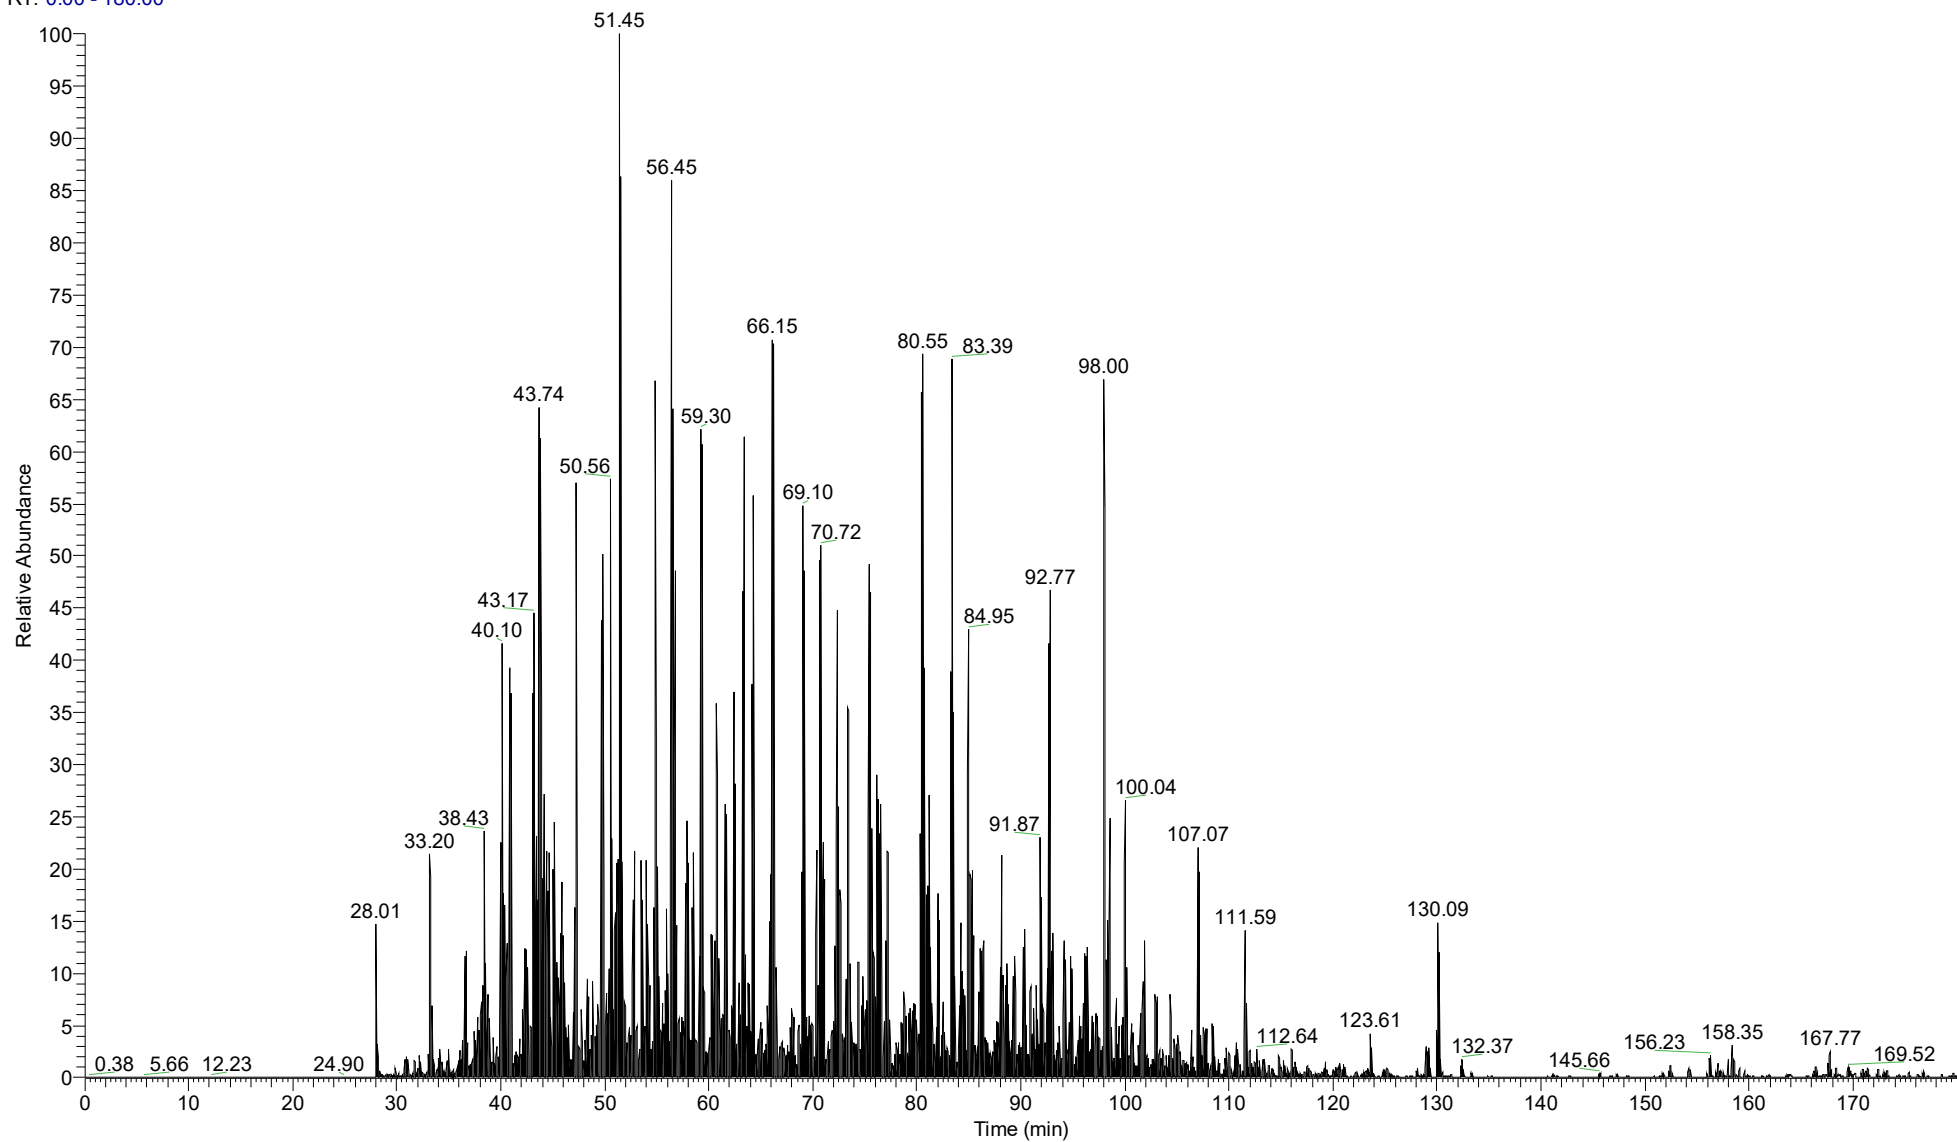

NL:  
2.99E9  
Base Peak  
MS  
20201109\_  
Multi\_P2-2

(E)Chloroform/methanol + FASP-3



RT: 0.00 - 180.00

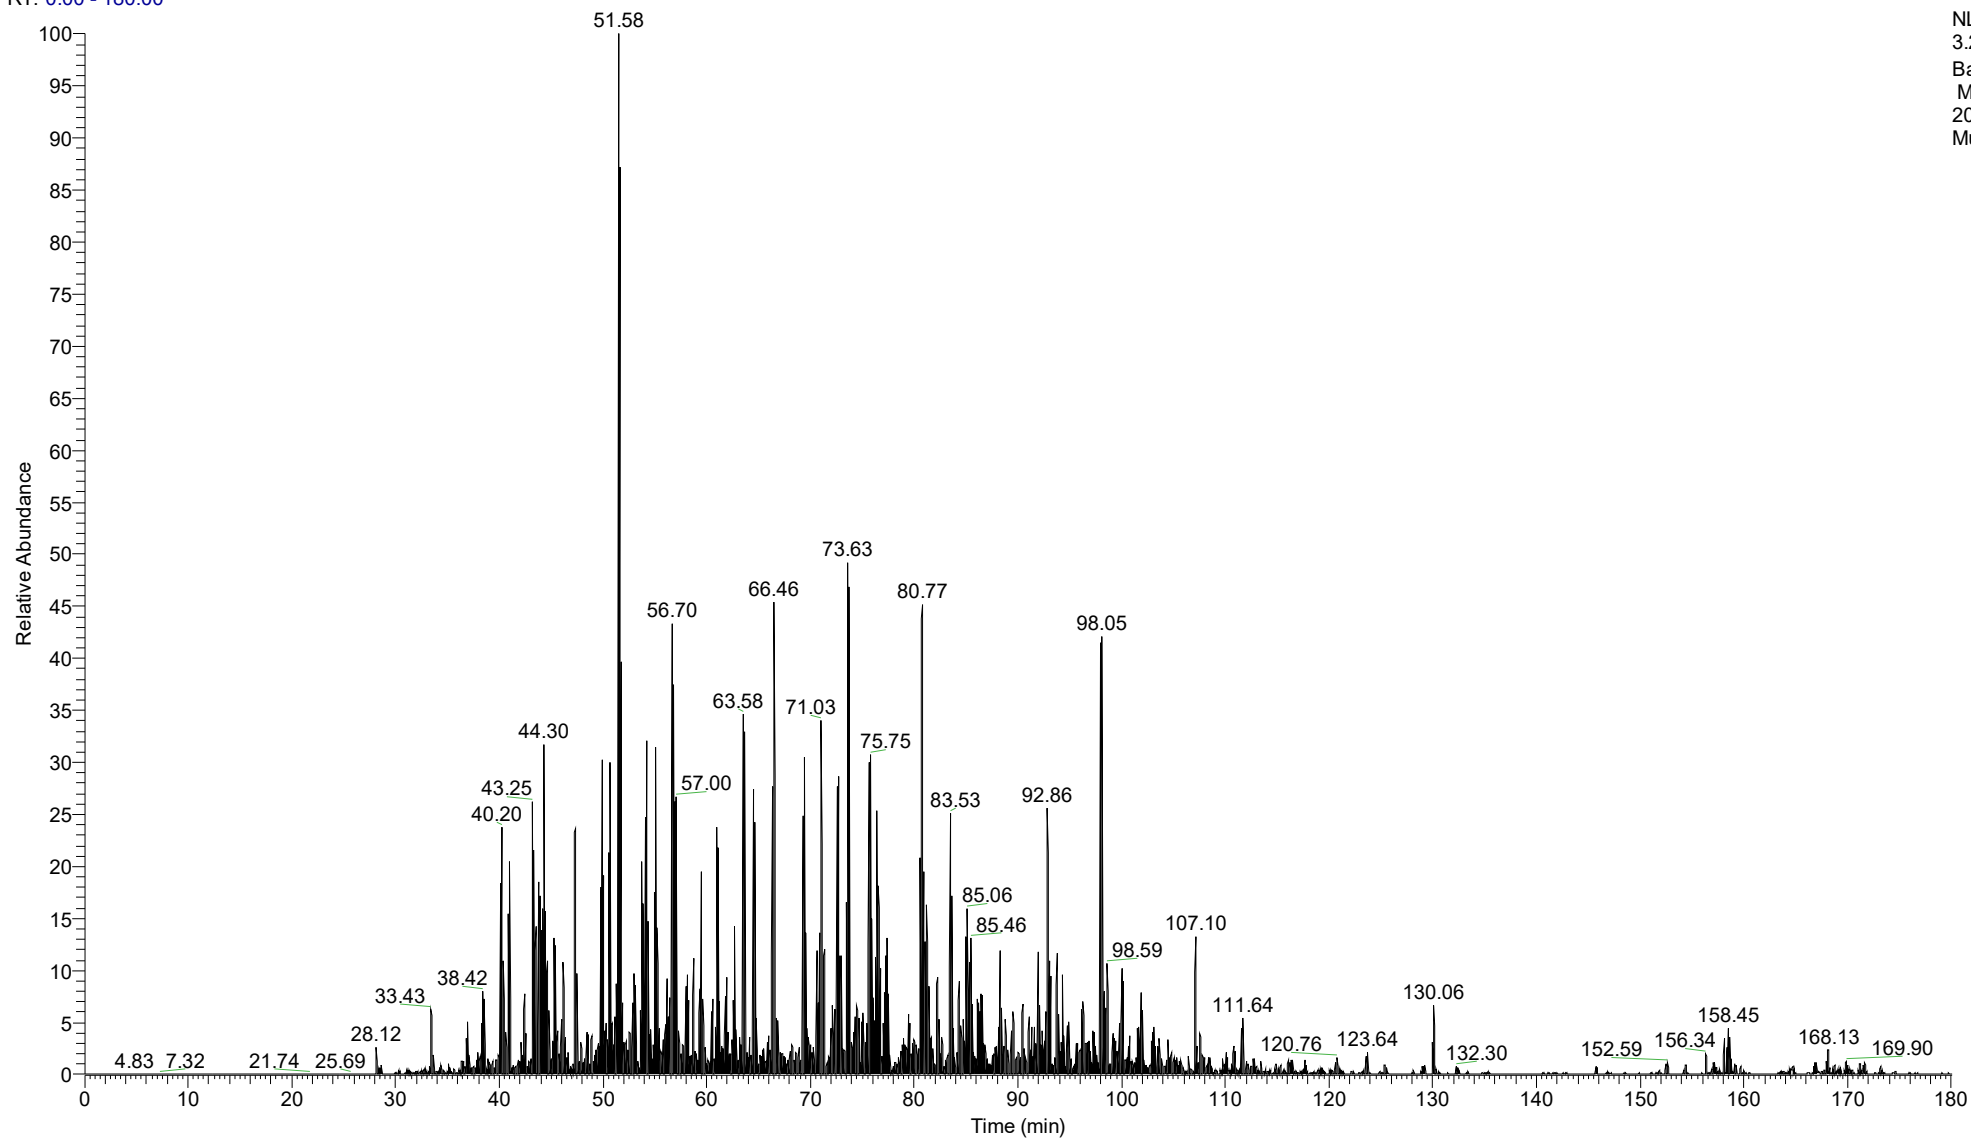

NL:  
3.23E9  
Base Peak  
MS  
20201109\_  
Multi\_P2-3

(F)MTBE + FASP-1

RT: 0.00 - 180.00

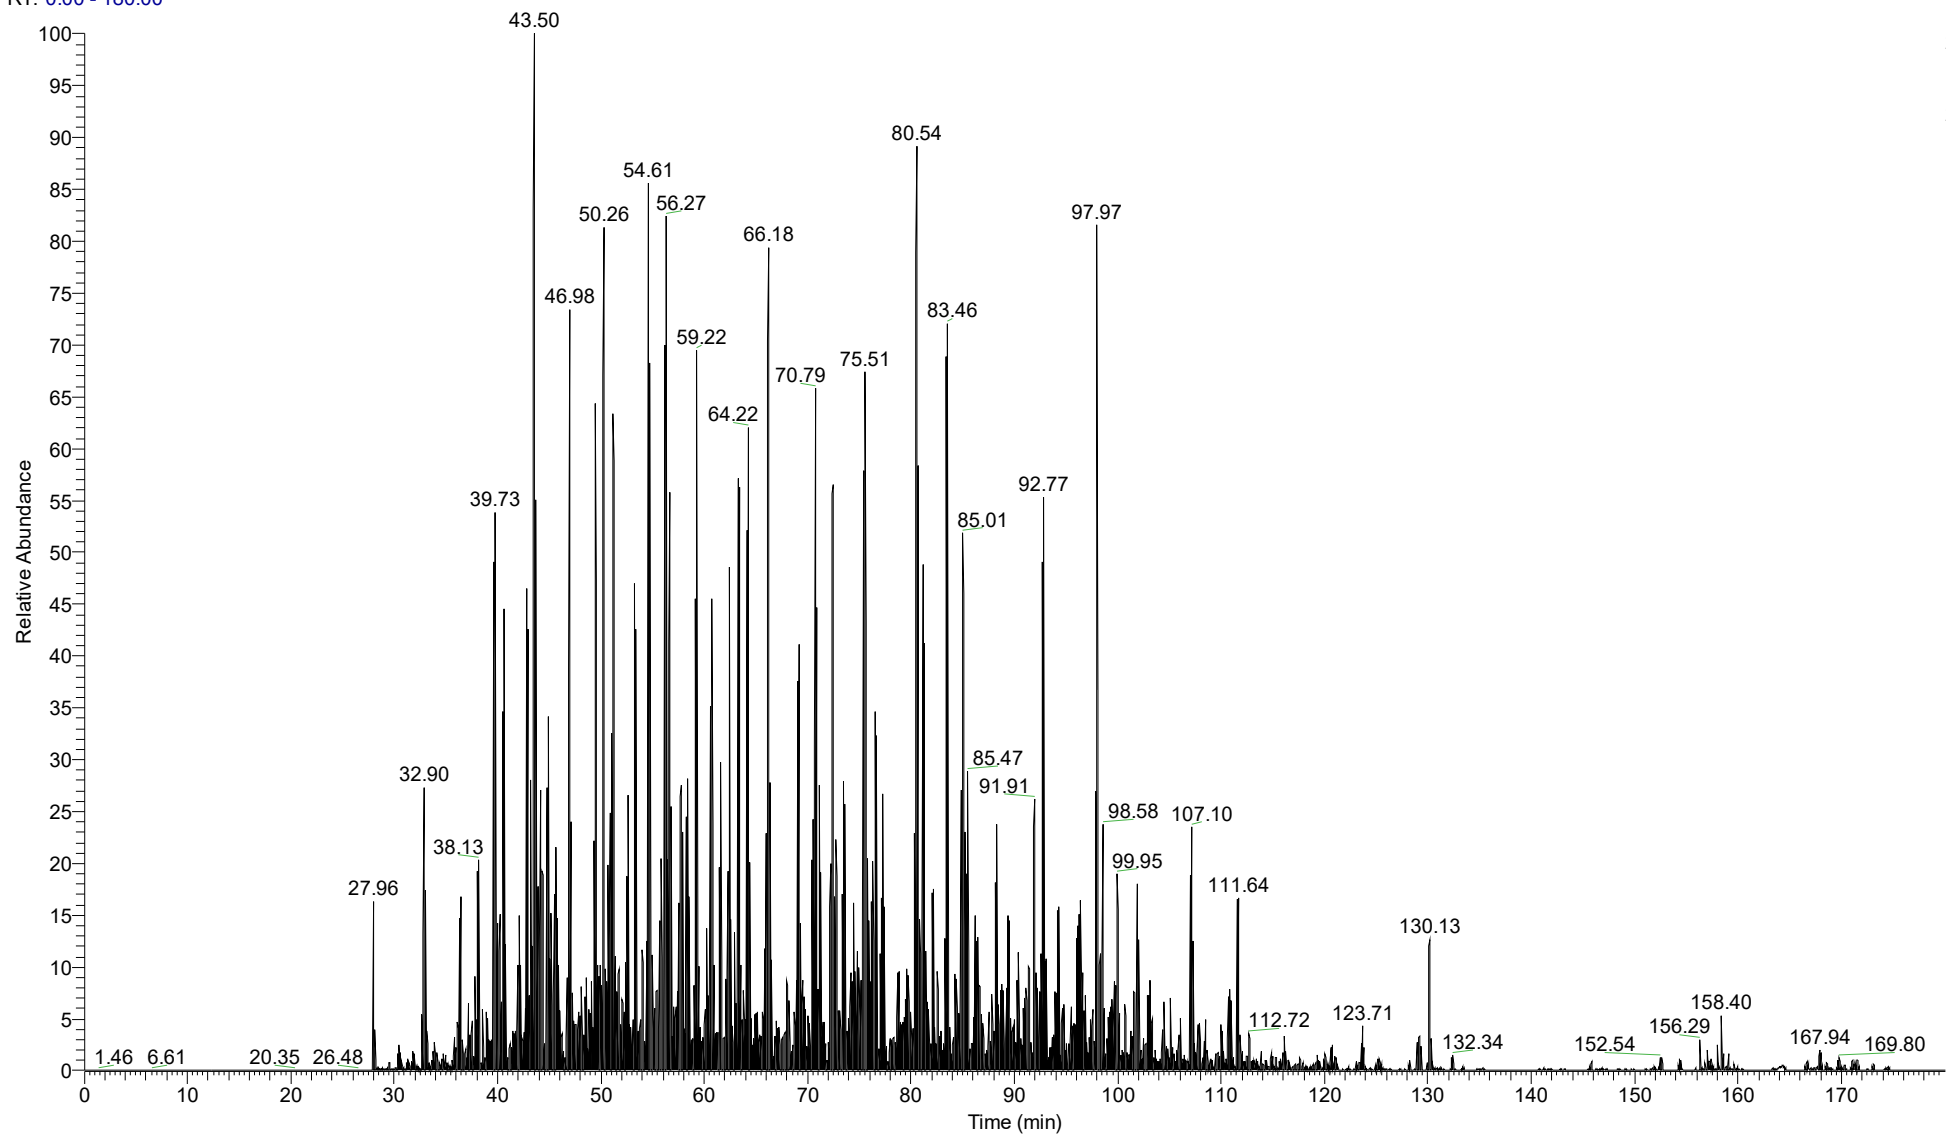

NL:  
2.45E9  
Base Peak  
MS  
20201109\_  
Multi\_P3-1

(F)MTBE + FASP-2

RT: 0.00 - 180.00

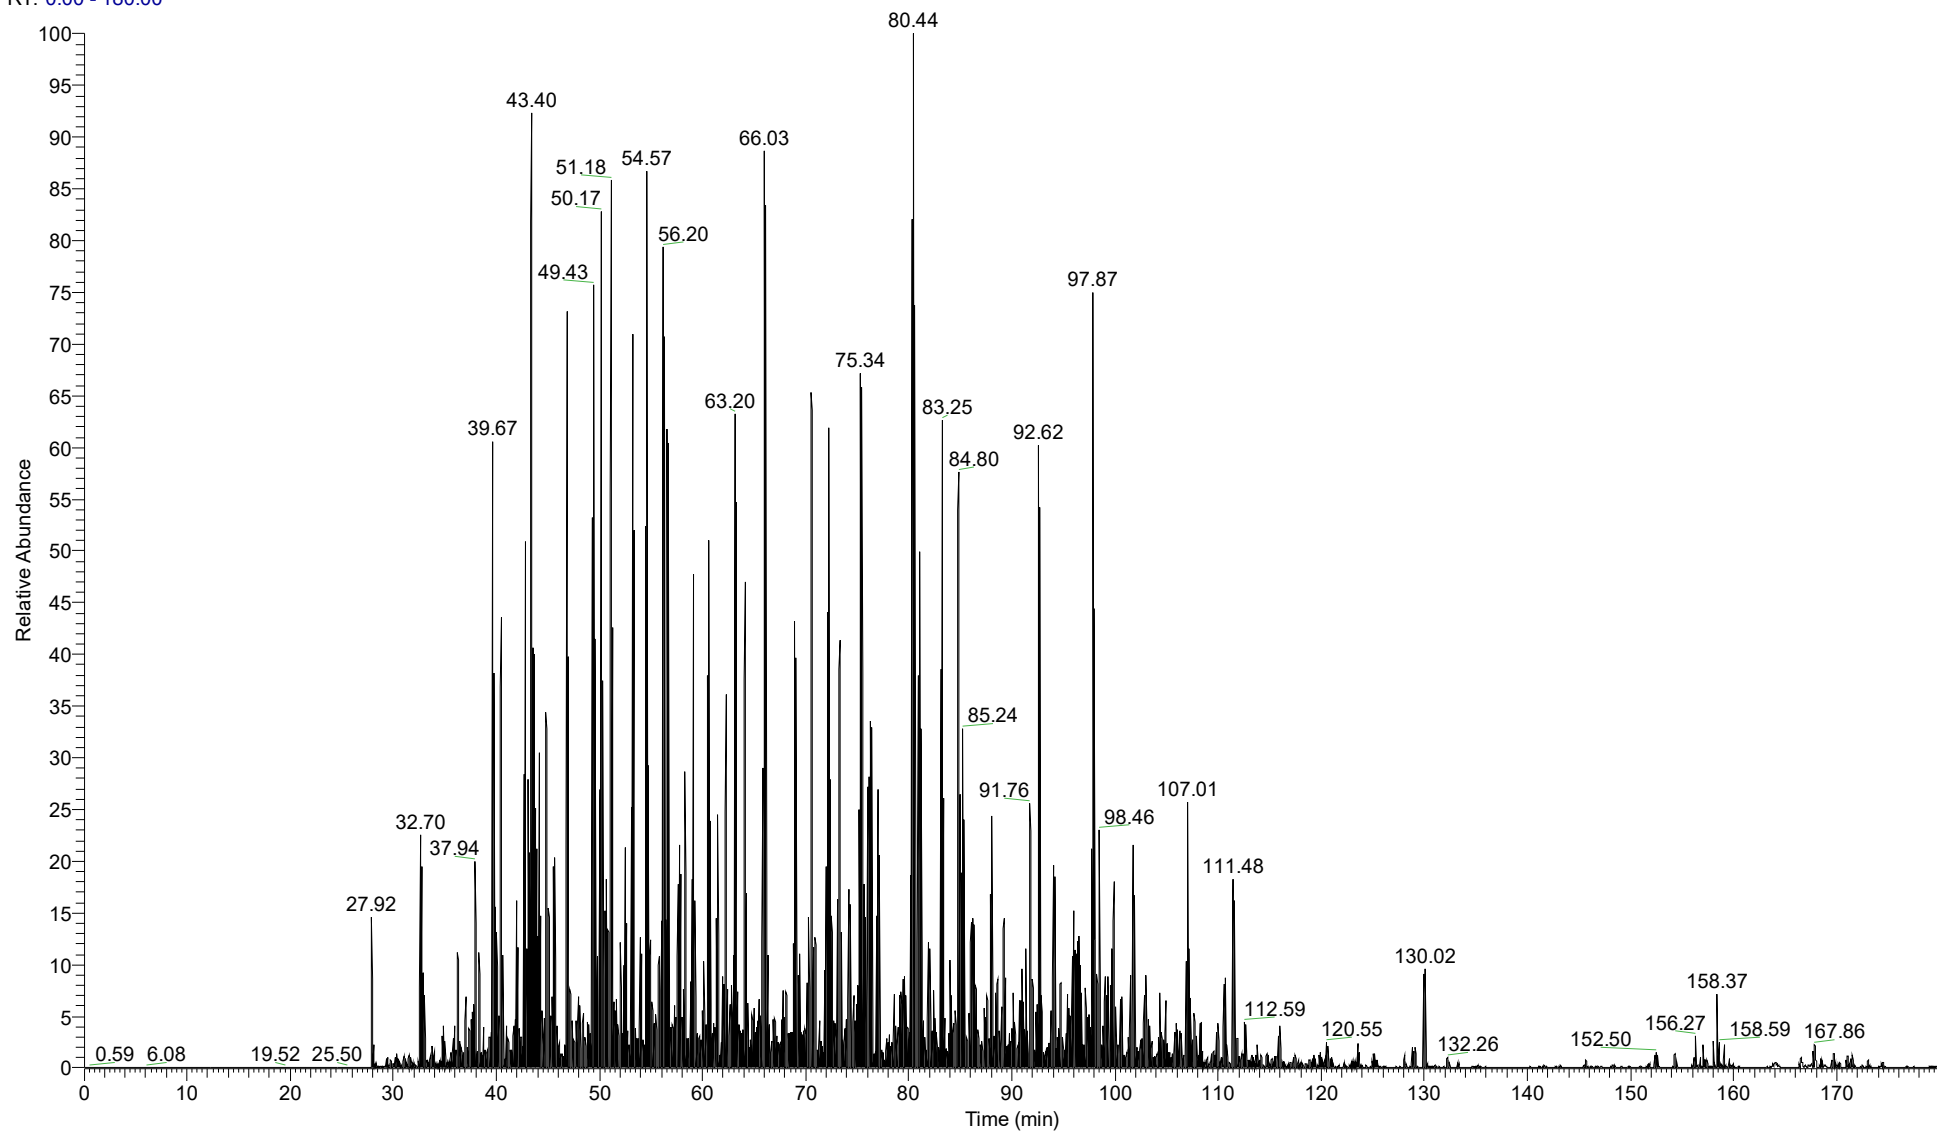

NL:  
1.93E9  
Base Peak  
MS  
20201109\_  
Multi\_P3-2

(F)MTBE + FASP-3

RT: 0.00 - 180.00

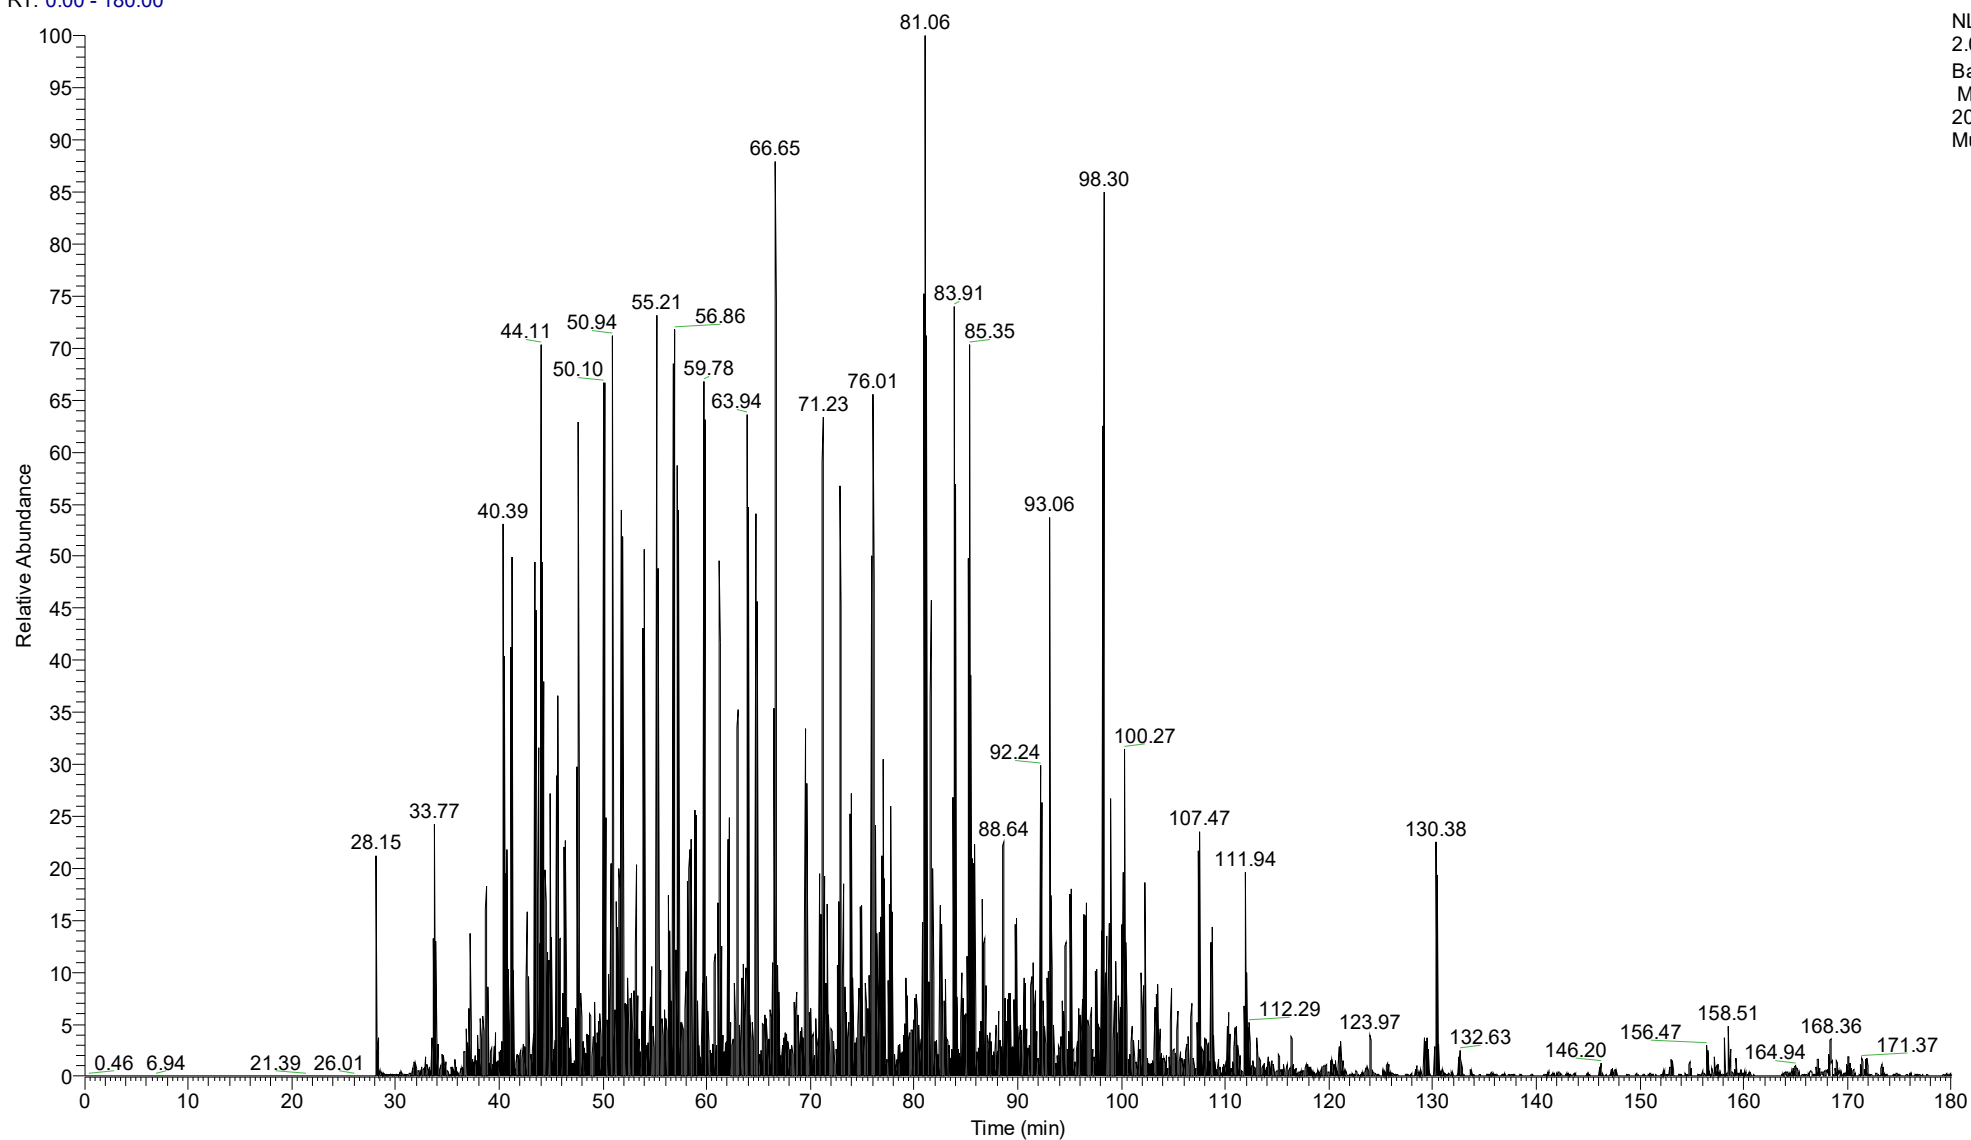

NL:  
2.06E9  
Base Peak  
MS  
20201109\_  
Multi\_P3-3

**Figure S1** Chromatogram of proteomics data of each method.

|                     | Label | Feature | ID(compound)<br>Level of Confidence : 3 | ID(compound)<br>Level of Confidence : 2 |
|---------------------|-------|---------|-----------------------------------------|-----------------------------------------|
| 80%methanol         | 1-1   | 3179    | 568                                     | 61                                      |
|                     | 1-2   | 3108    | 543                                     | 63                                      |
|                     | 1-3   | 3158    | 545                                     | 86                                      |
| Chloroform/methanol | 2-1   | 2306    | 434                                     | 64                                      |
|                     | 2-2   | 2126    | 418                                     | 69                                      |
|                     | 2-3   | 2360    | 458                                     | 61                                      |
| MTBE                | 3-1   | 2680    | 496                                     | 74                                      |
|                     | 3-2   | 2549    | 480                                     | 66                                      |
|                     | 3-3   | 2510    | 460                                     | 74                                      |

**Figure S2** List of the number of metabolite features, compounds identified as level of confidence 2,3 for each extraction method

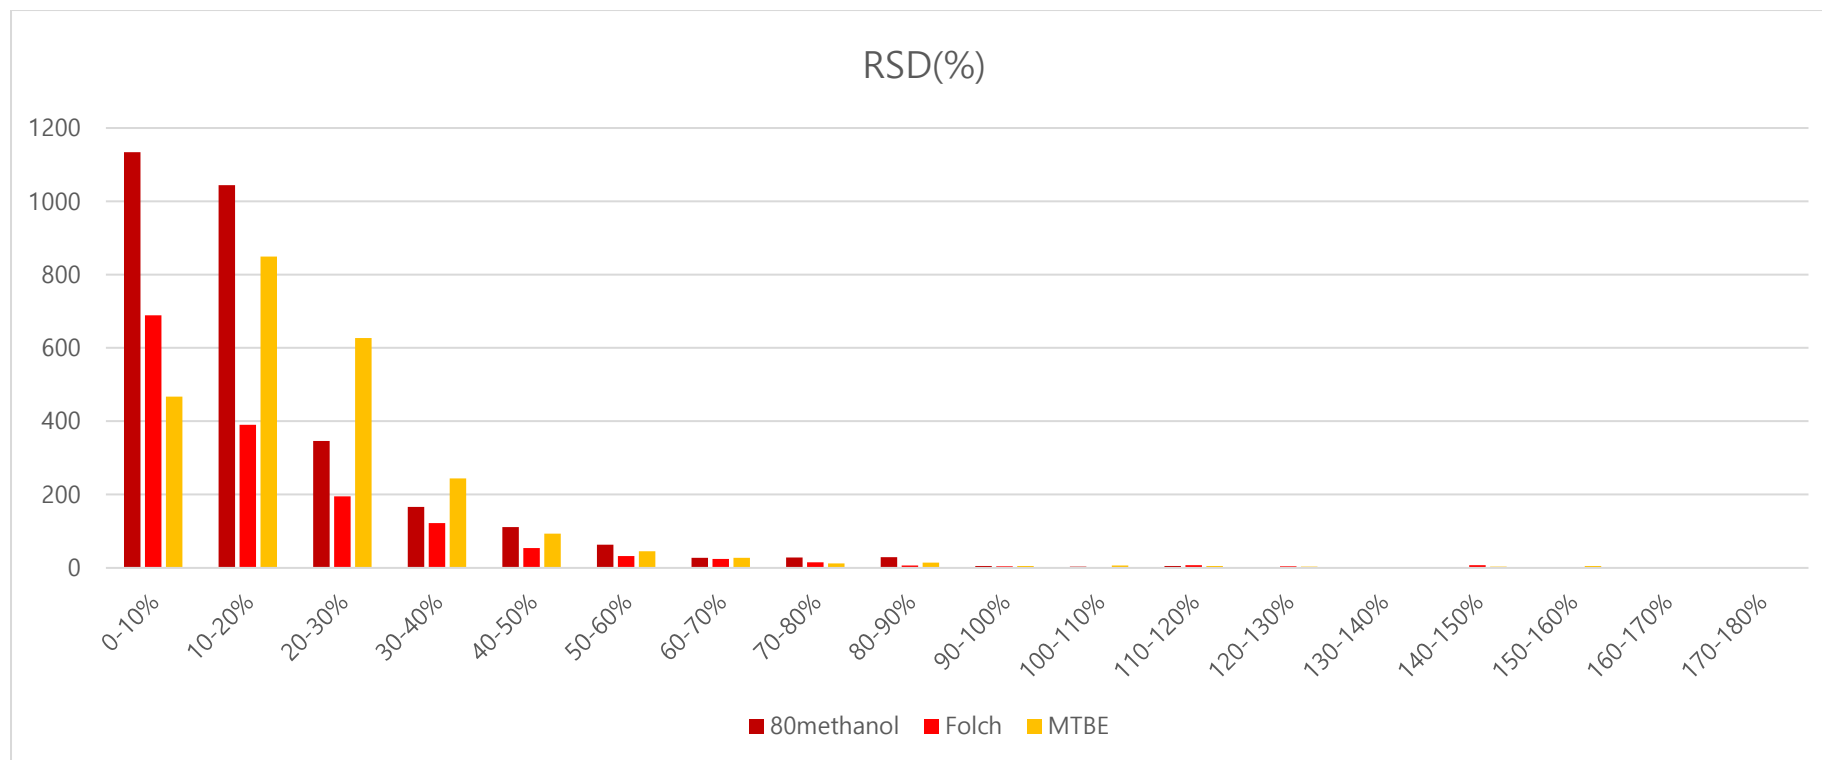

**Figure S3** Histogram for RSD of each method(metabolite).

(A)80%methanol + S-trap-1

(A)80%methanol-1

RT: 0.00 - 90.01

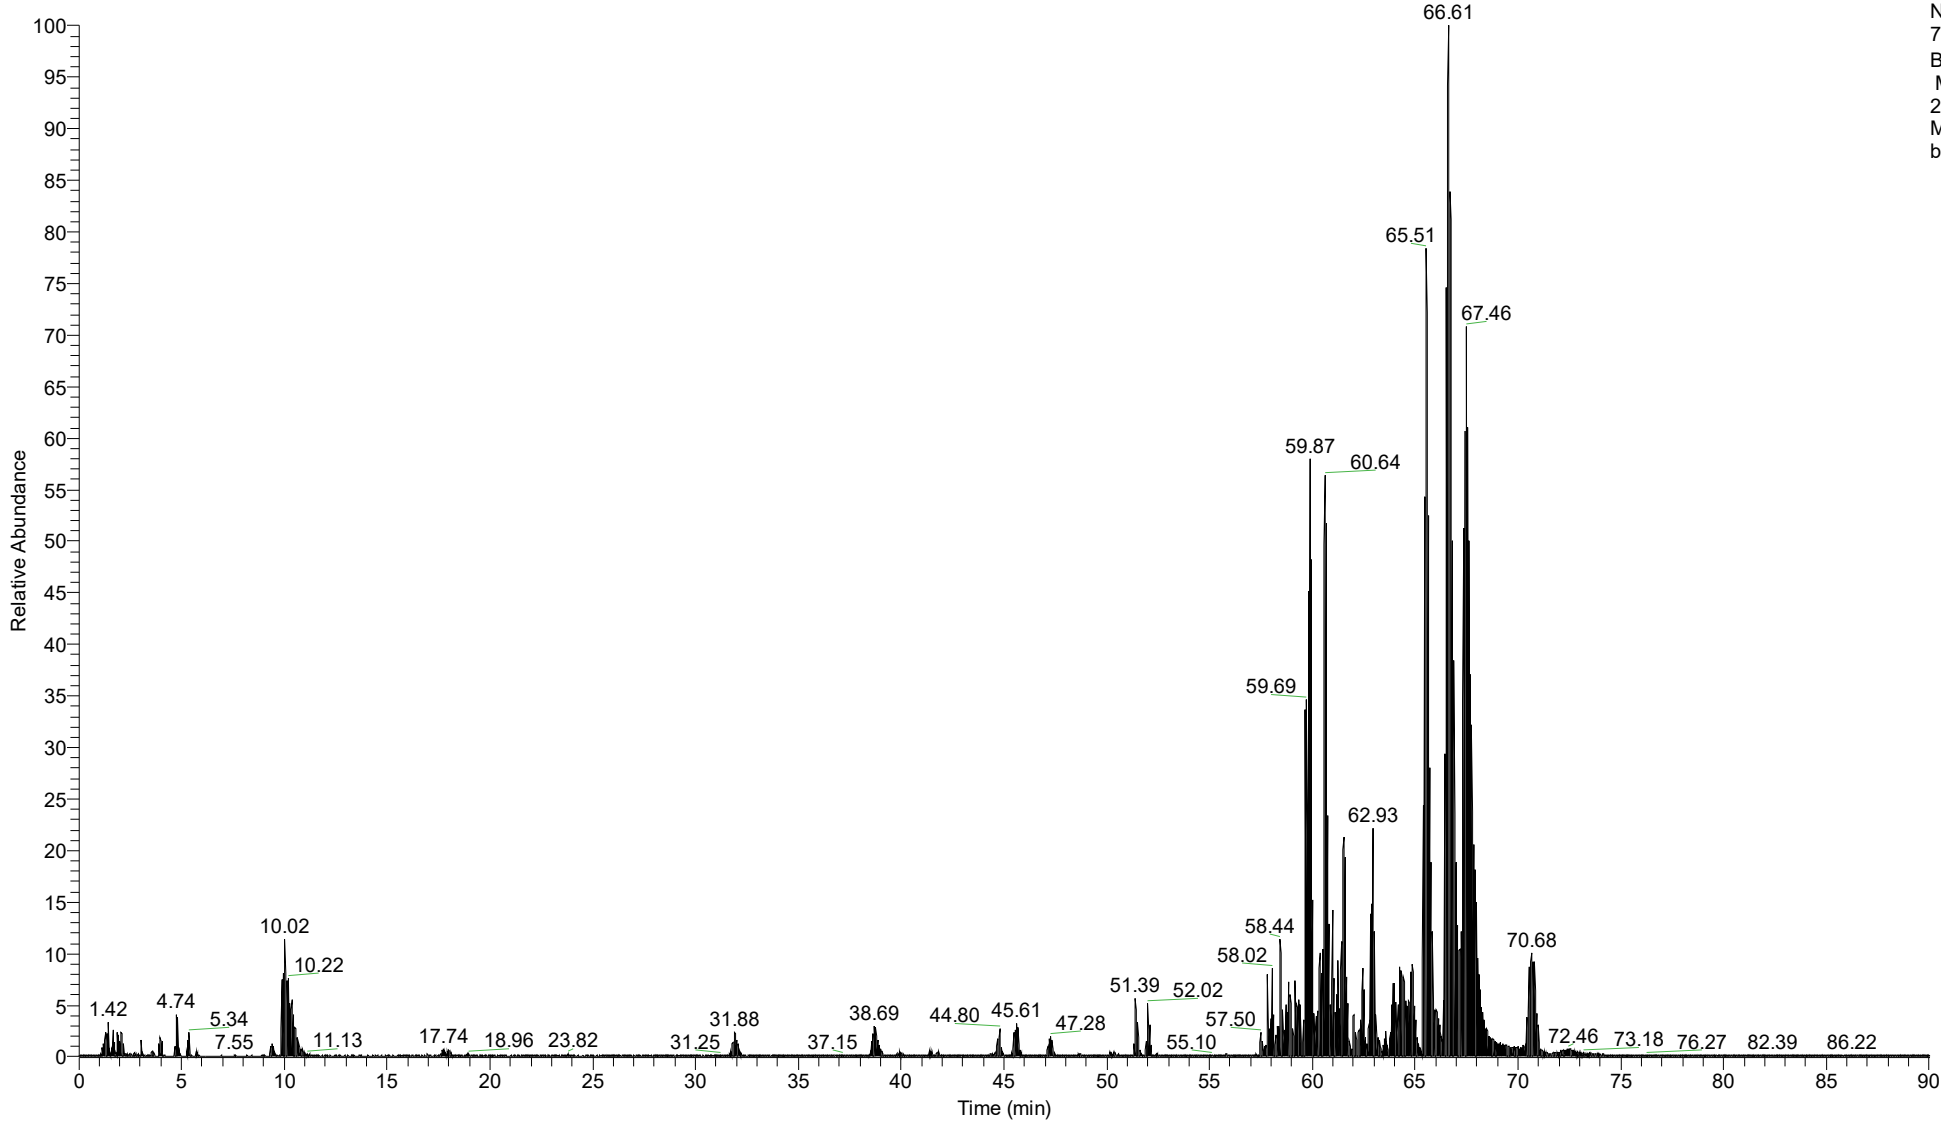

NL:  
7.29E9  
Base Peak  
MS  
20201008\_  
Multi\_meta  
bolite1-1

(A)80%methanol-2

RT: 0.00 - 90.01

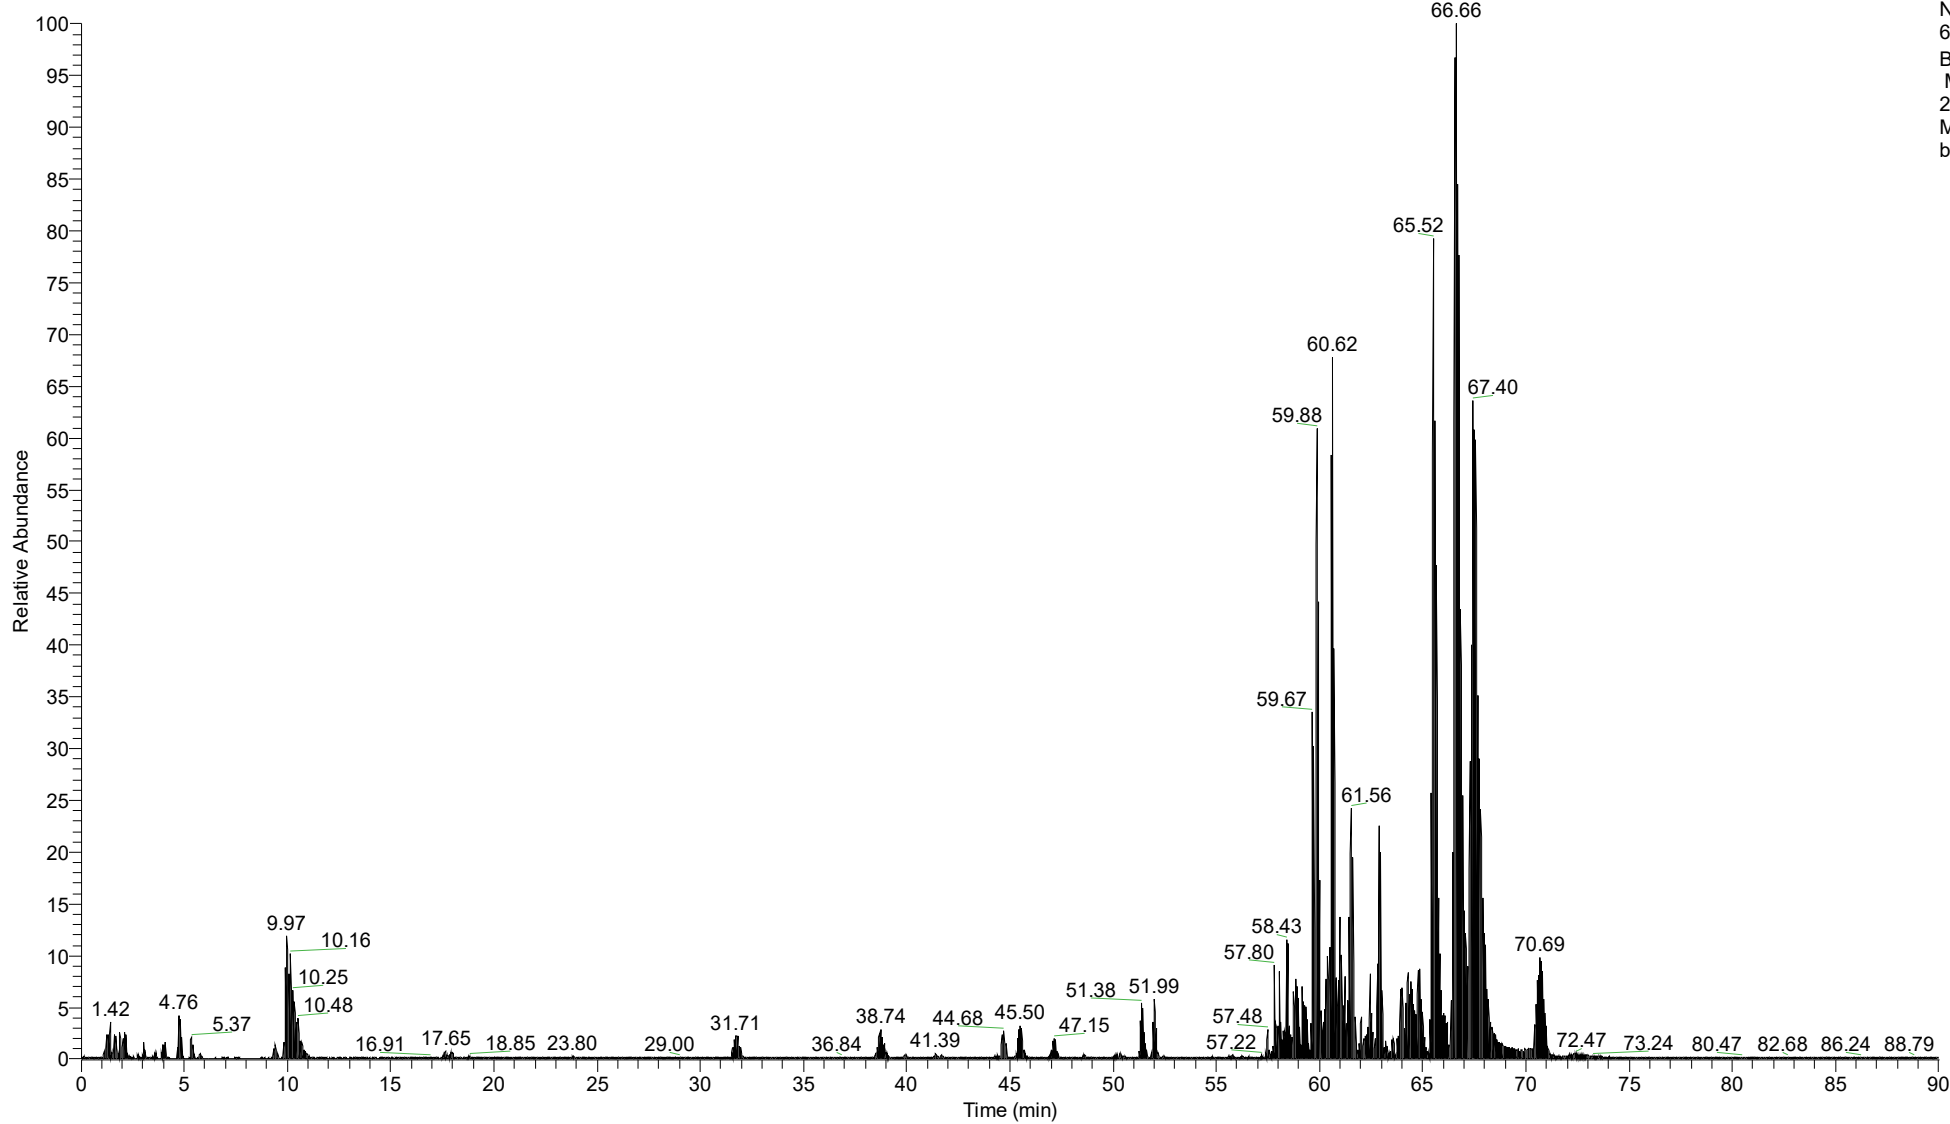

NL:  
6.68E9  
Base Peak  
MS  
20201008\_  
Multi\_meta  
bolite1-2



(A)80%methanol-3

RT: 0.00 - 90.01

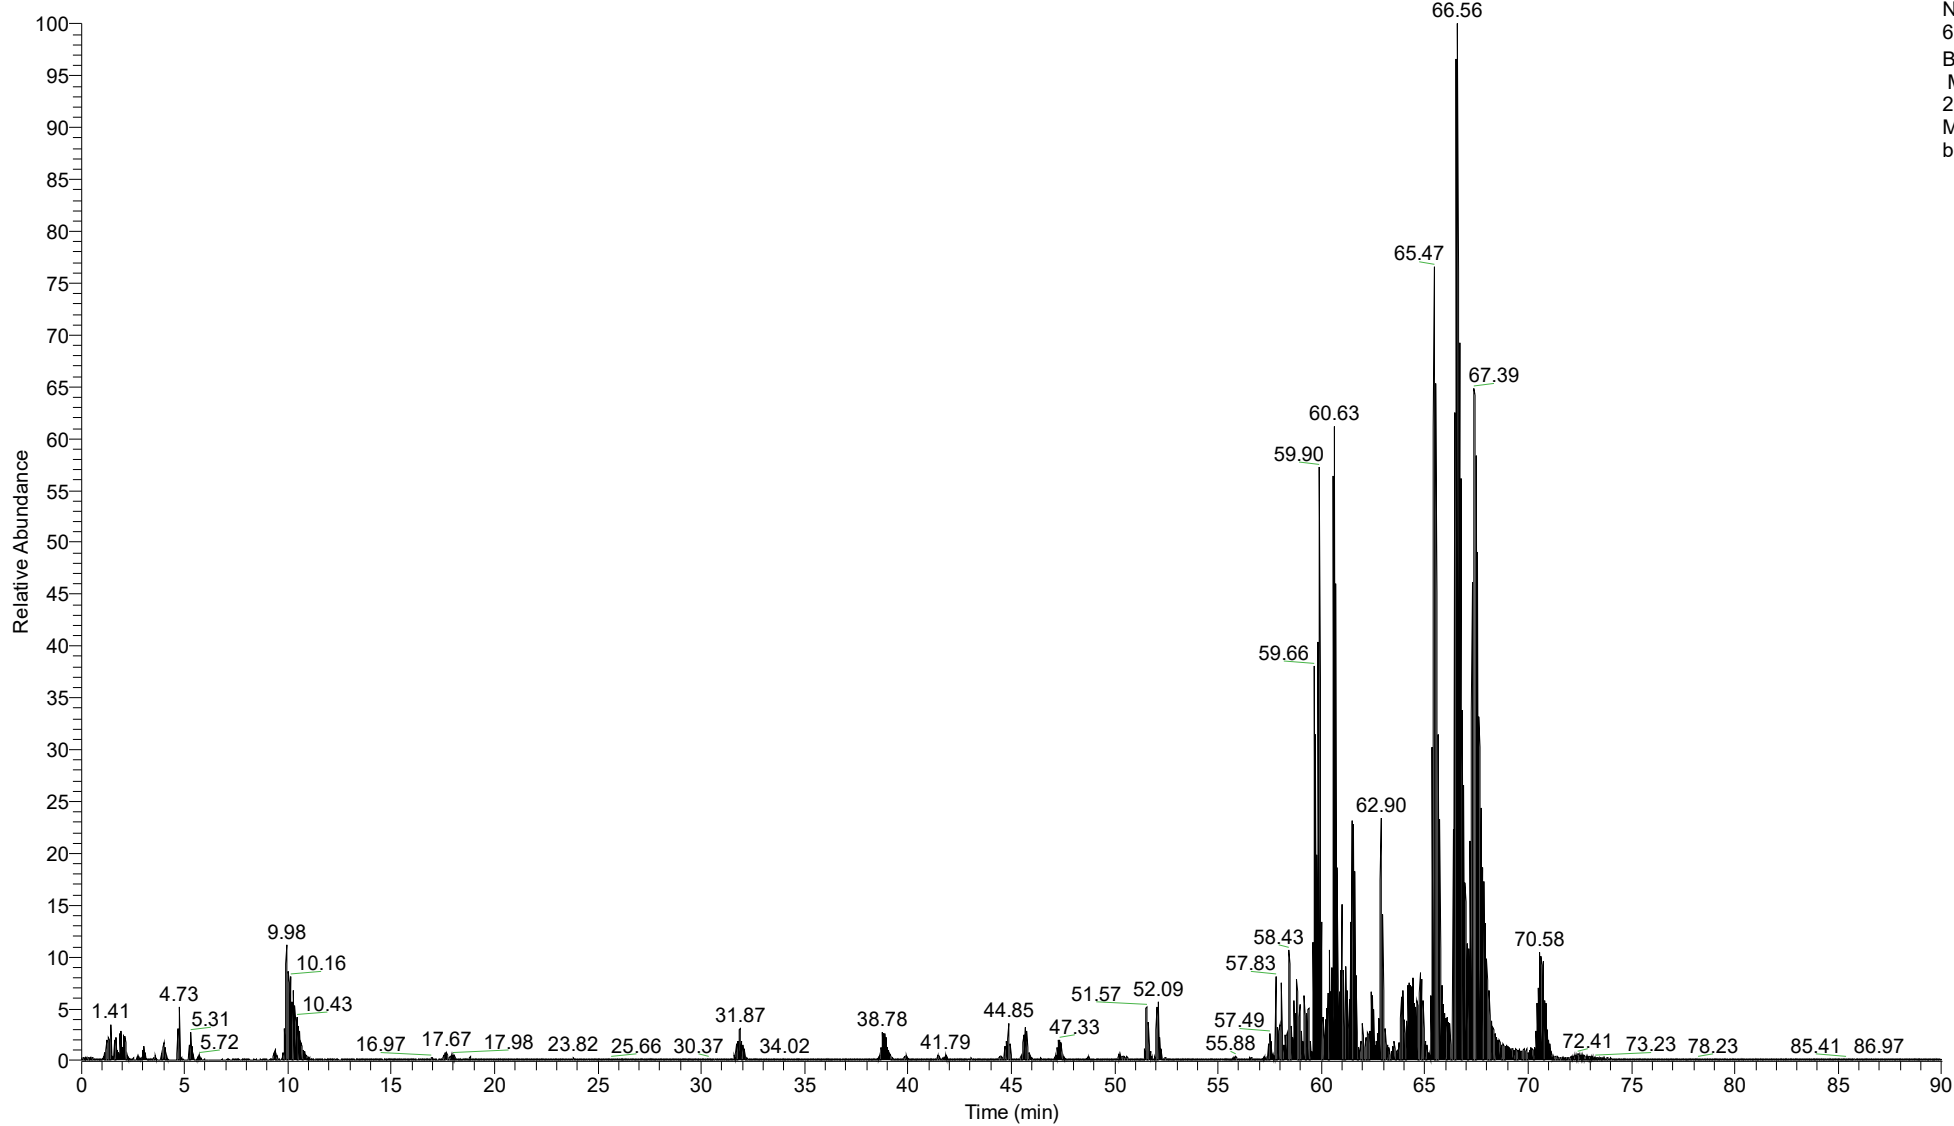

NL:  
6.90E9  
Base Peak  
MS  
20201008\_  
Multi\_meta  
bolite1-3

(B)Chloroform/methanol-1

RT: 0.00 - 90.01

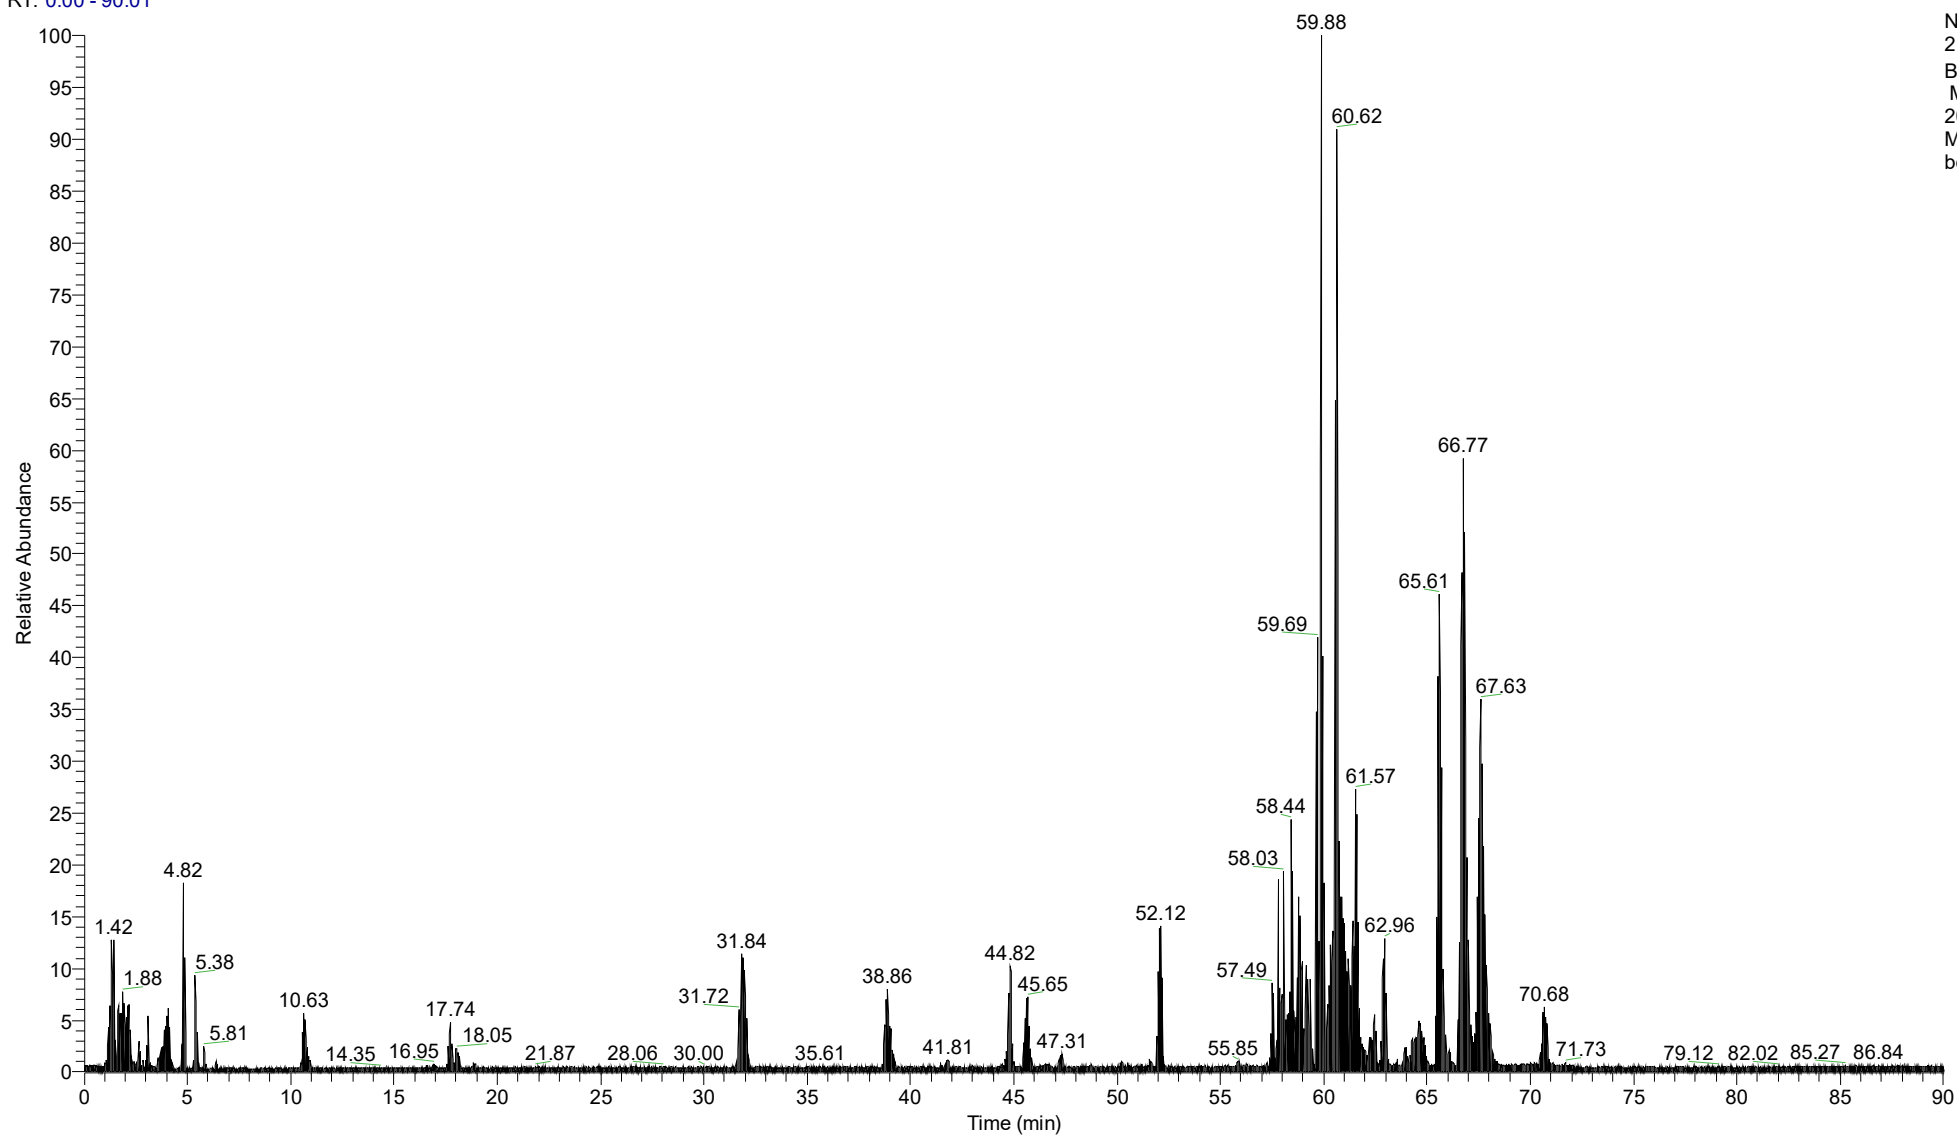

NL:  
2.15E9  
Base Peak  
MS  
20201008\_  
Multi\_meta  
bolite2-1

(B)Chloroform/methanol-2

RT: 0.00 - 90.01

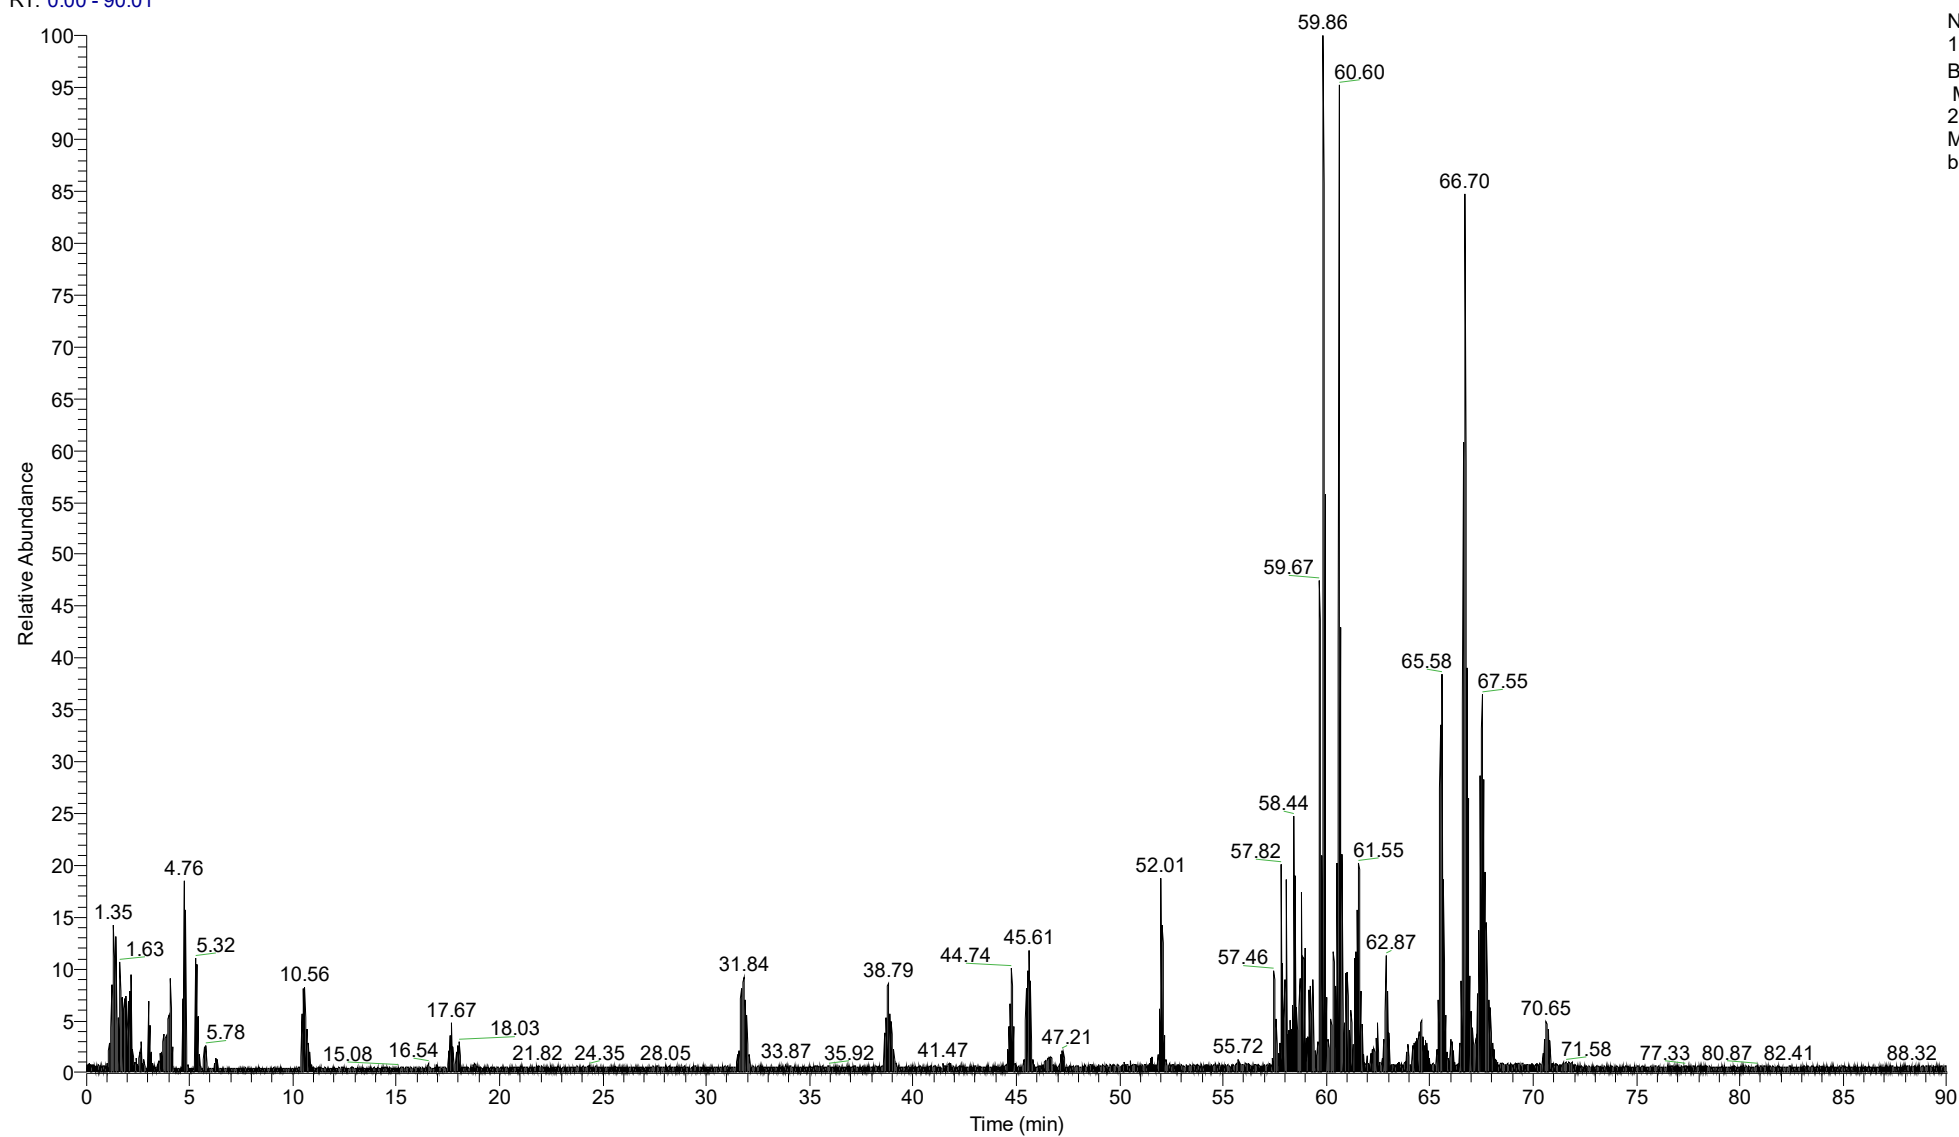

NL:  
1.89E9  
Base Peak  
MS  
20201008\_  
Multi\_meta  
bolite2-2

(B)Chloroform/methanol-3

RT: 0.00 - 90.01

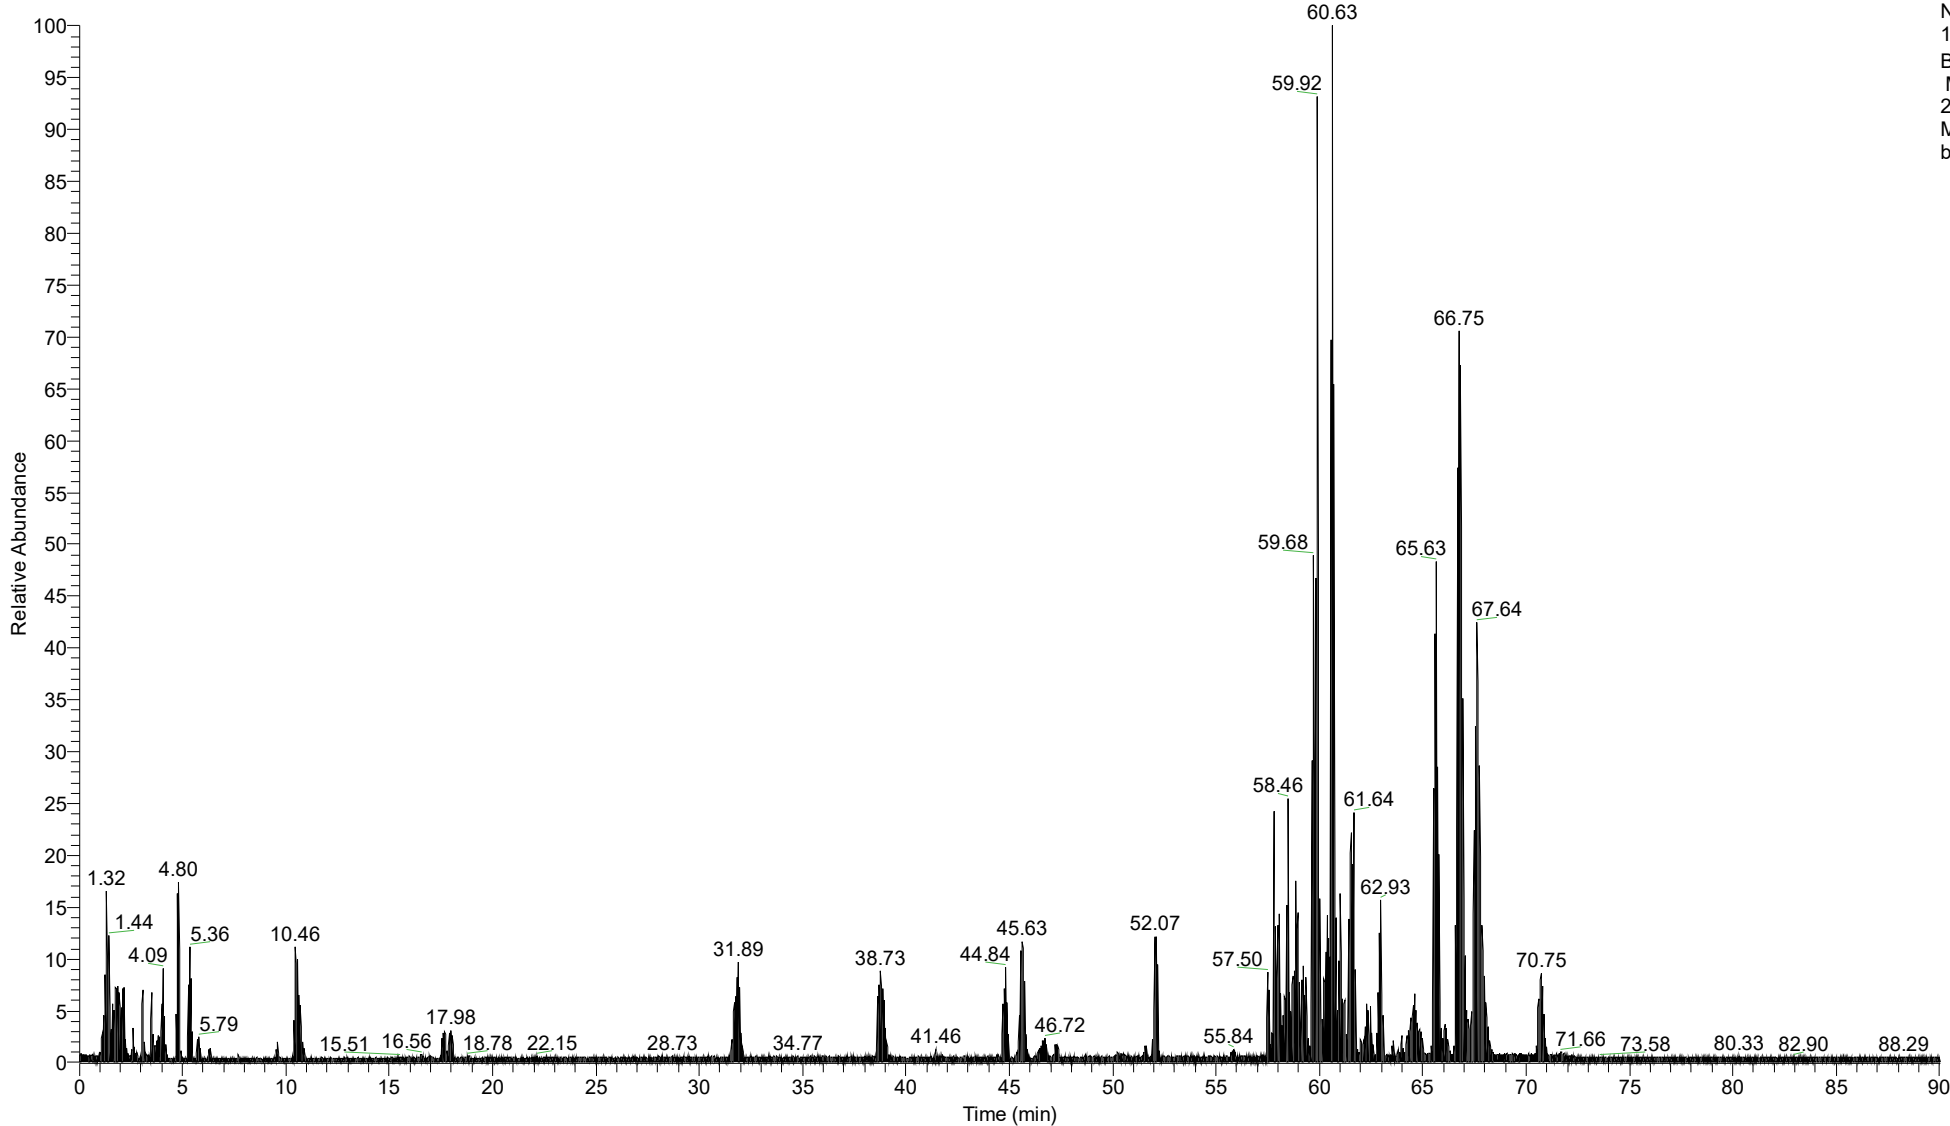

NL:  
1.99E9  
Base Peak  
MS  
20201008\_  
Multi\_meta  
bolite2-3

(C)MTBE-1

RT: 0.00 - 90.01

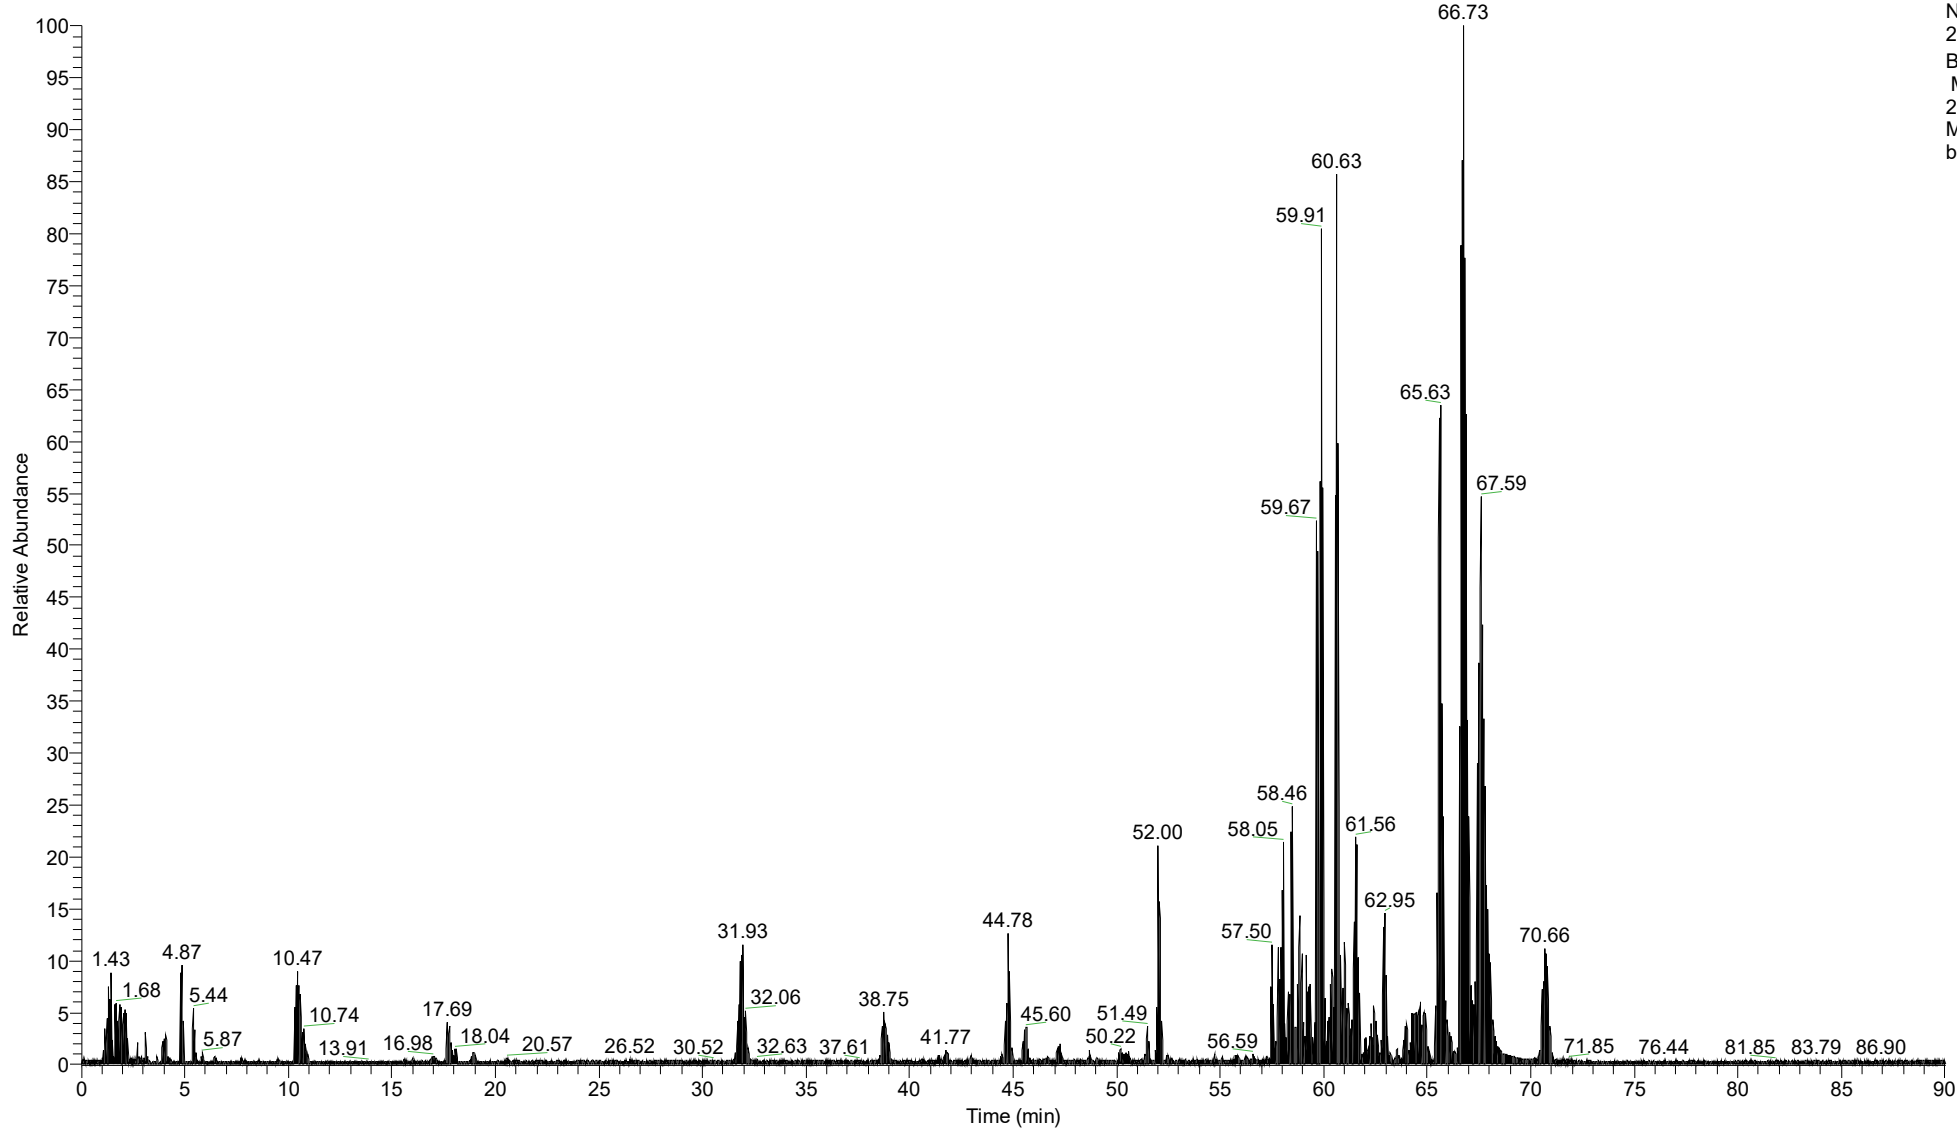

NL:  
2.88E9  
Base Peak  
MS  
20201008\_  
Multi\_meta  
bolite3-1

(C)MTBE-2

RT: 0.00 - 90.01

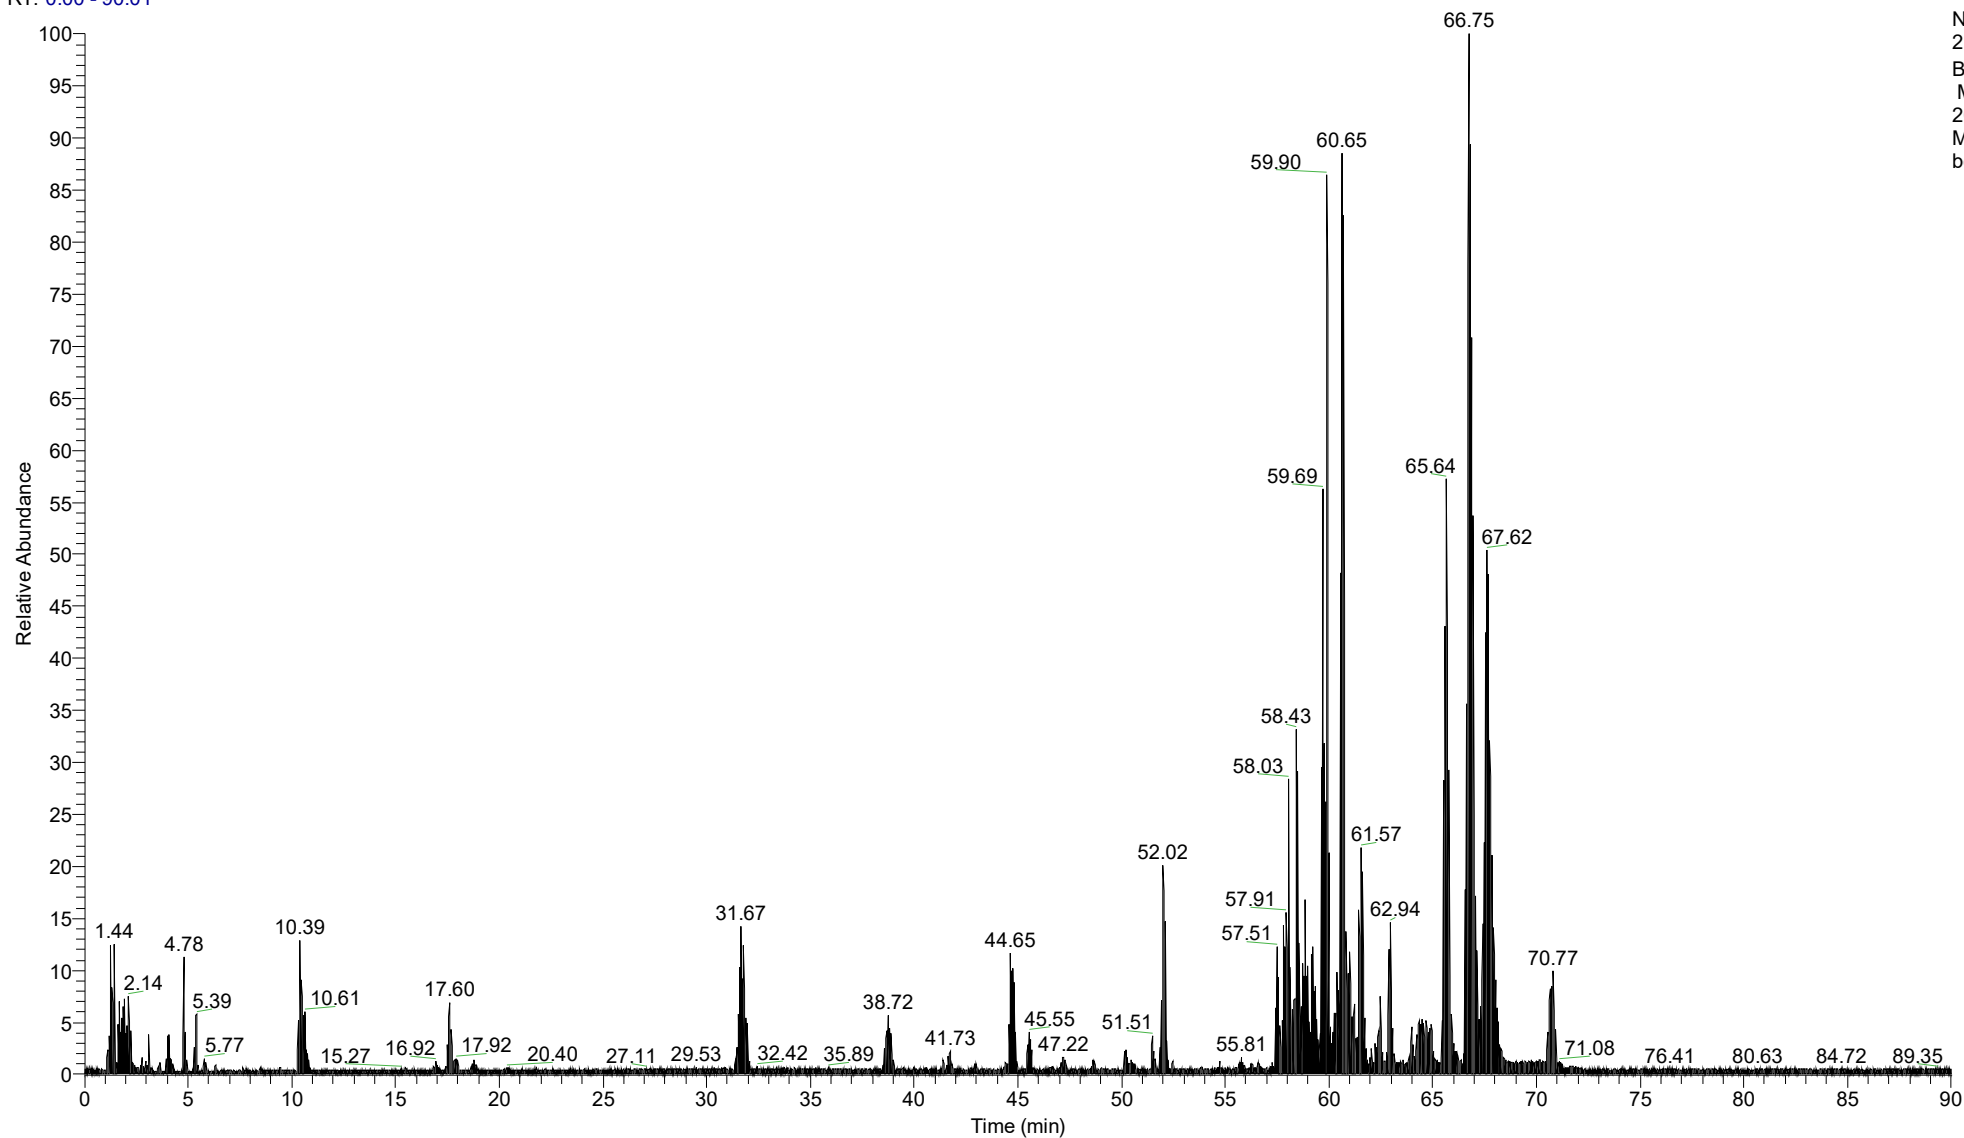

NL:  
2.21E9  
Base Peak  
MS  
20201008\_  
Multi\_meta  
bolite3-2

(C)MTBE-3

RT: 0.00 - 90.01

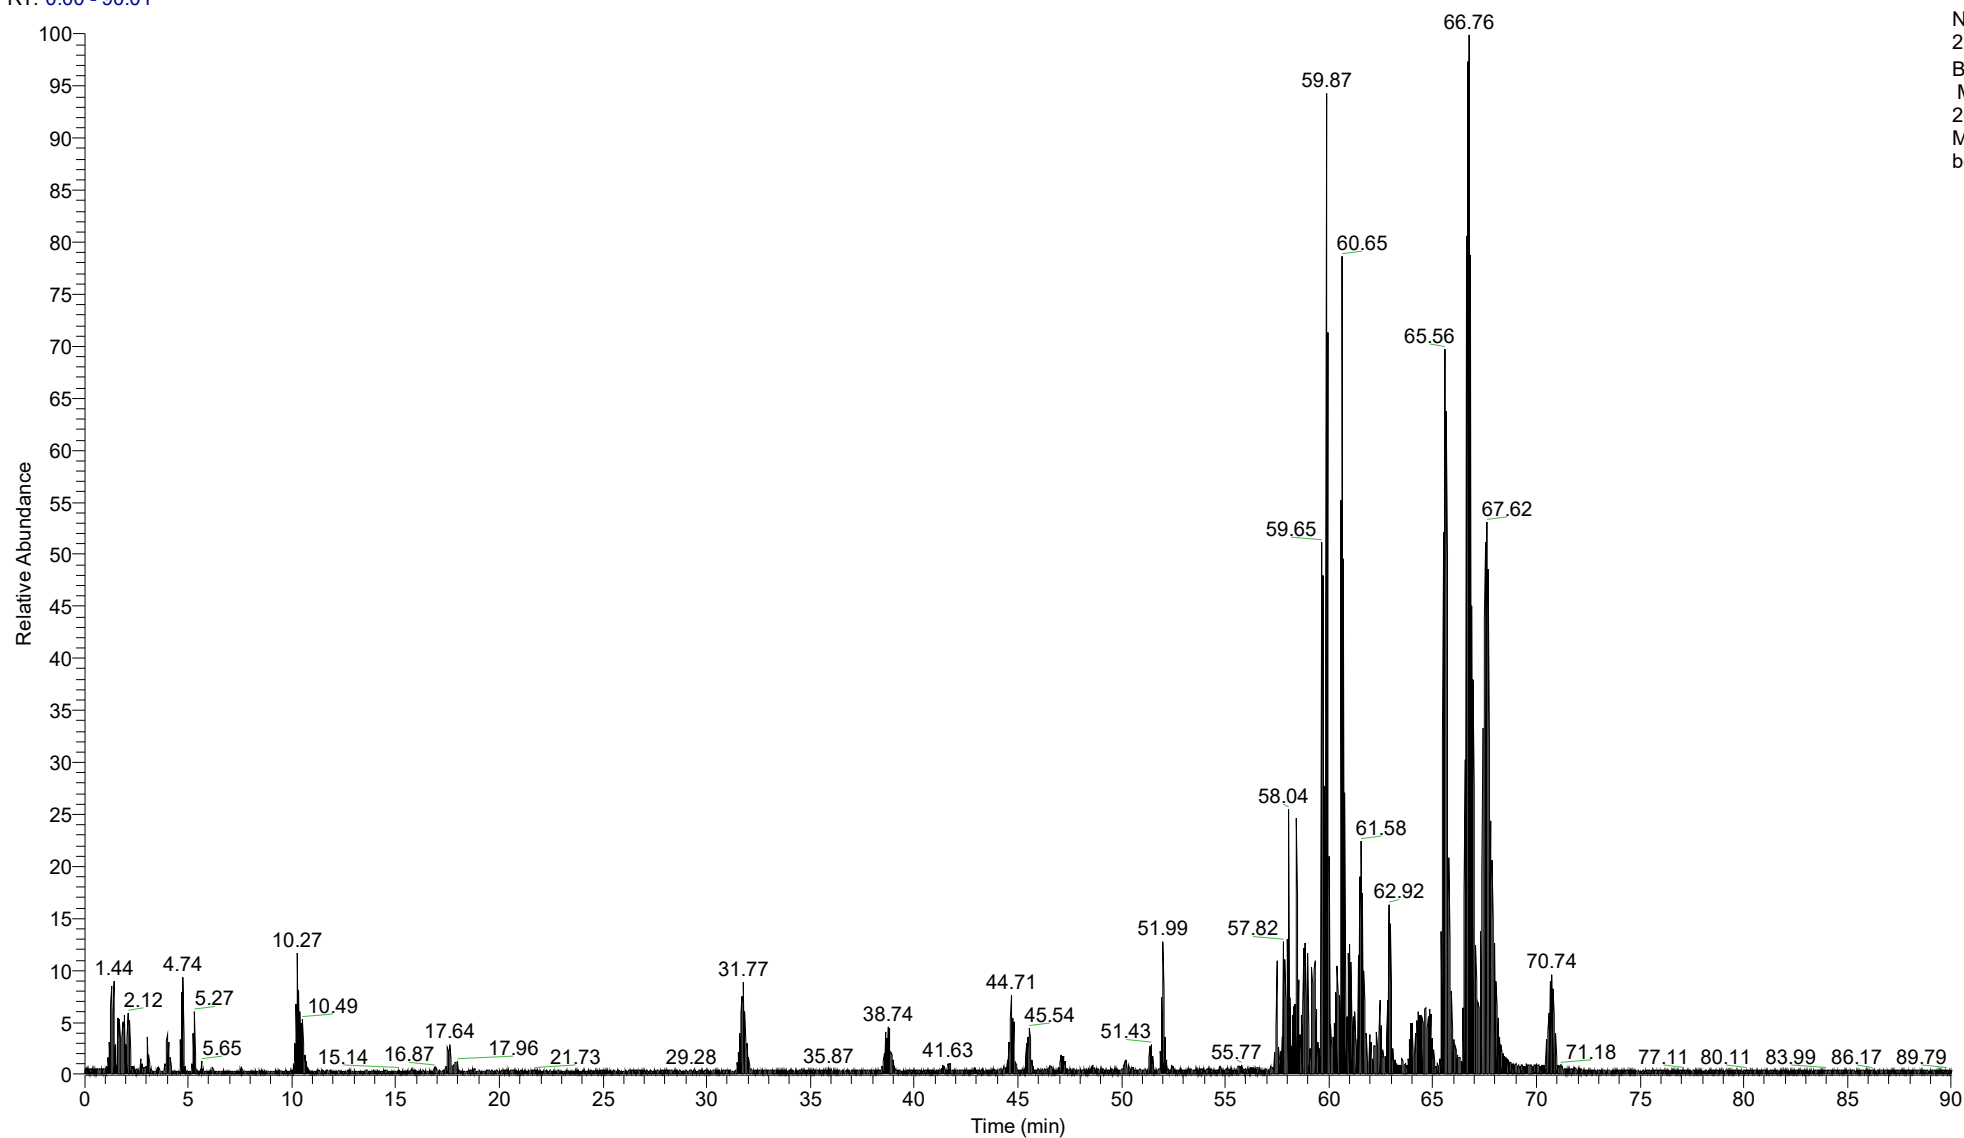

NL:  
2.79E9  
Base Peak  
MS  
20201008\_  
Multi\_meta  
bolite3-3

Figure S4 Chromatogram of metabolomics data of each method.

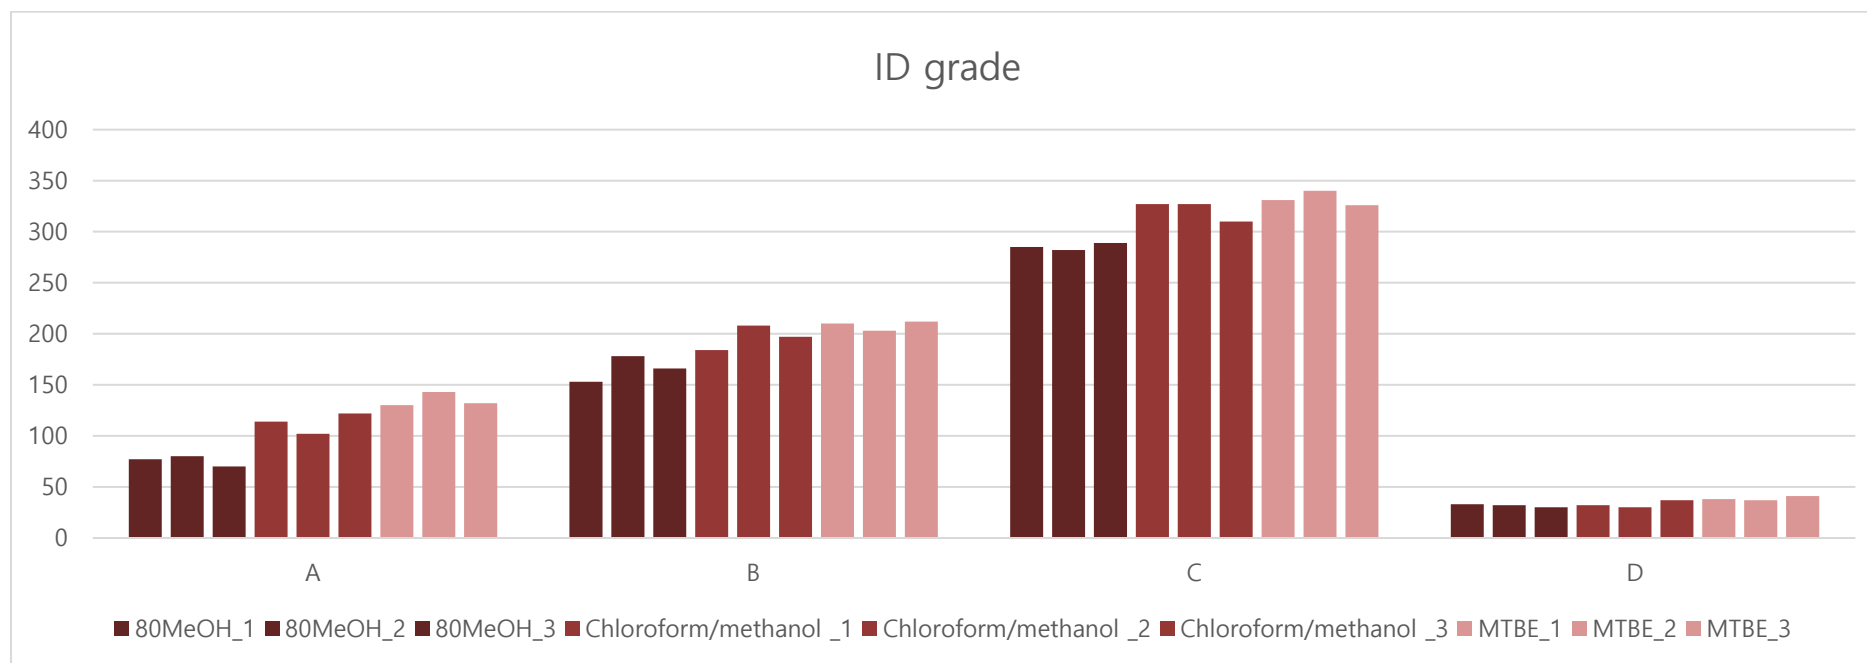

**Figure S5.** ID grade graph for each extraction method of lipids identified by lipid search. (ID Quality filter- Grade A : Lipid of which fatty acid chains and class were identified completely./ Grade B : Lipid of which class and some fatty acid chains were identified./Grade C : Lipid of which class or fatty acid was identified./Grade D : other)



(A)80%methanol-1

RT: 0.00 - 30.01

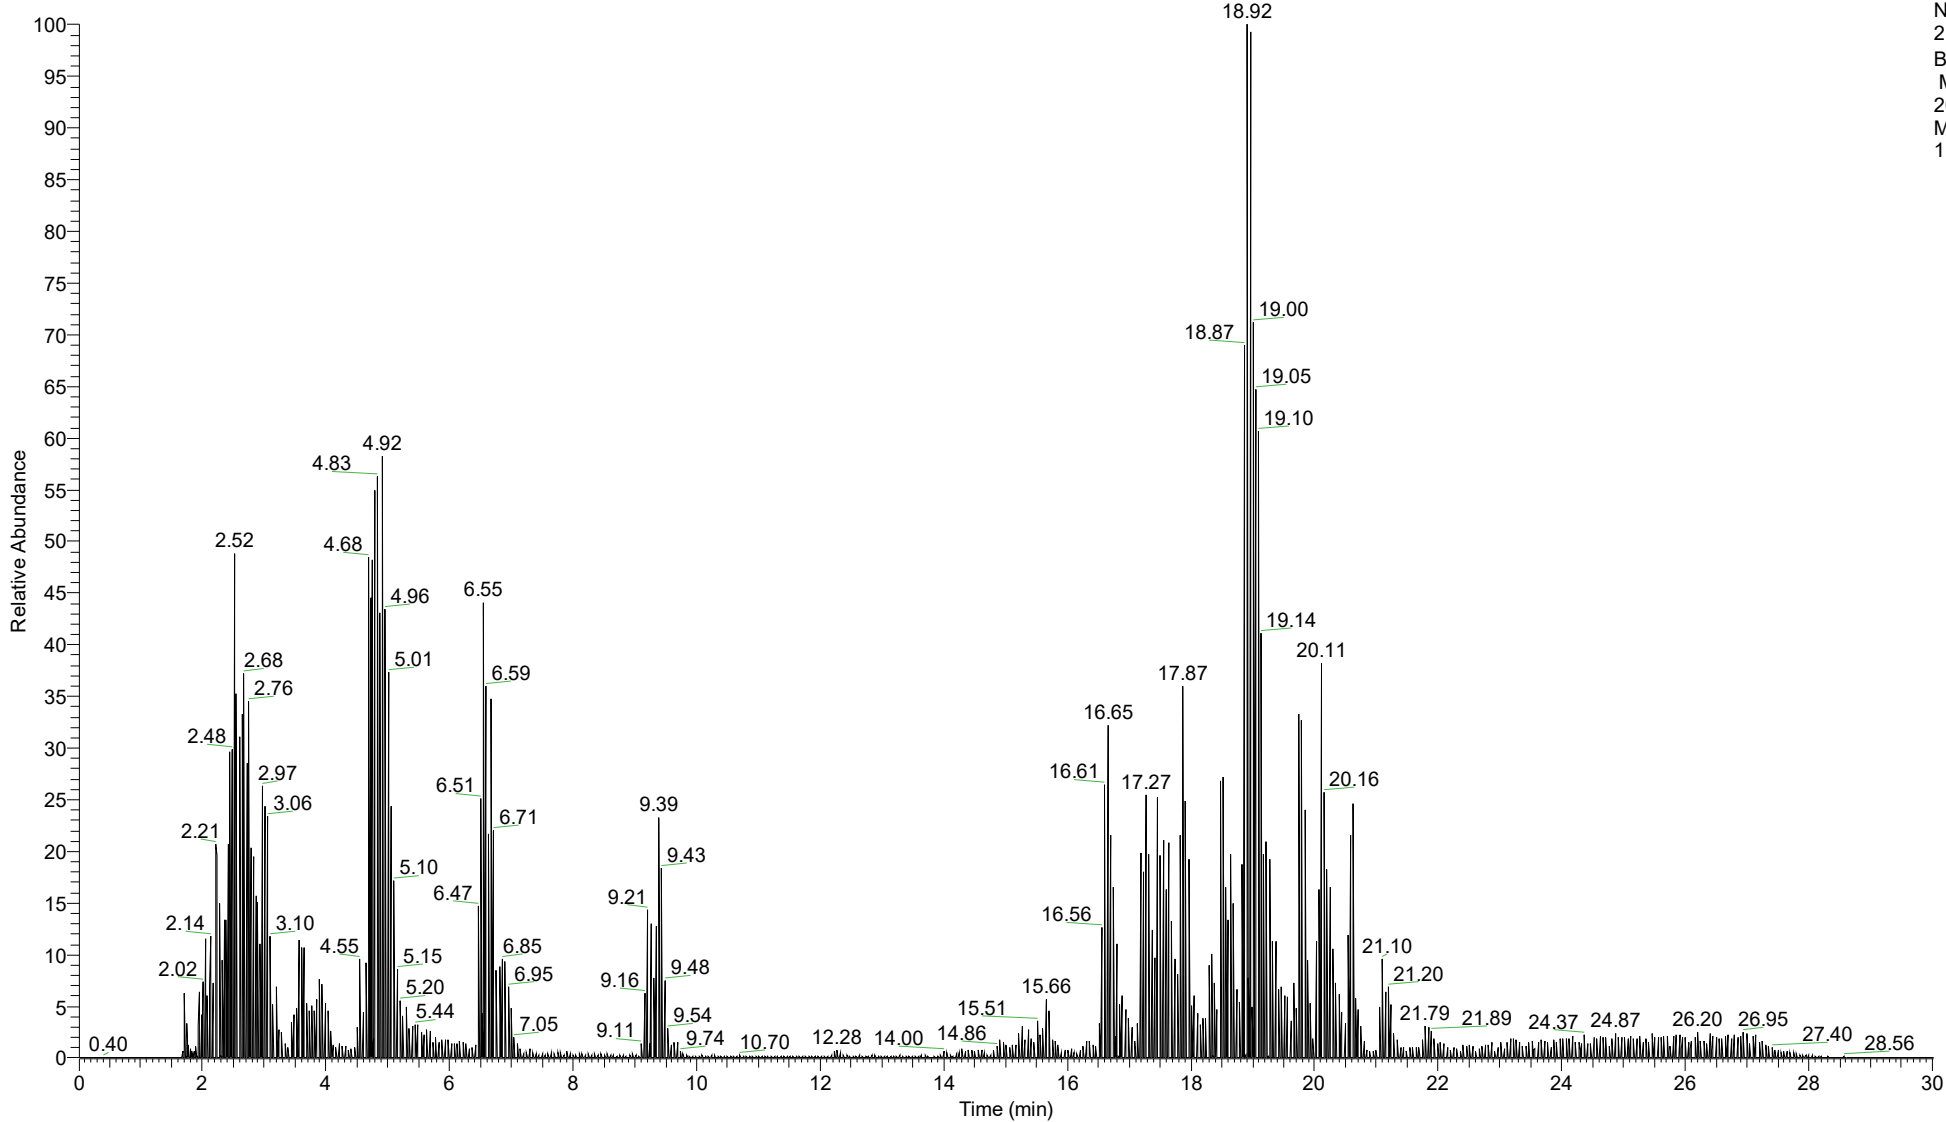

NL:  
2.91E9  
Base Peak  
MS  
20201007\_  
Multi\_lipid1-  
1

(A)80%methanol-2

RT: 0.00 - 30.01

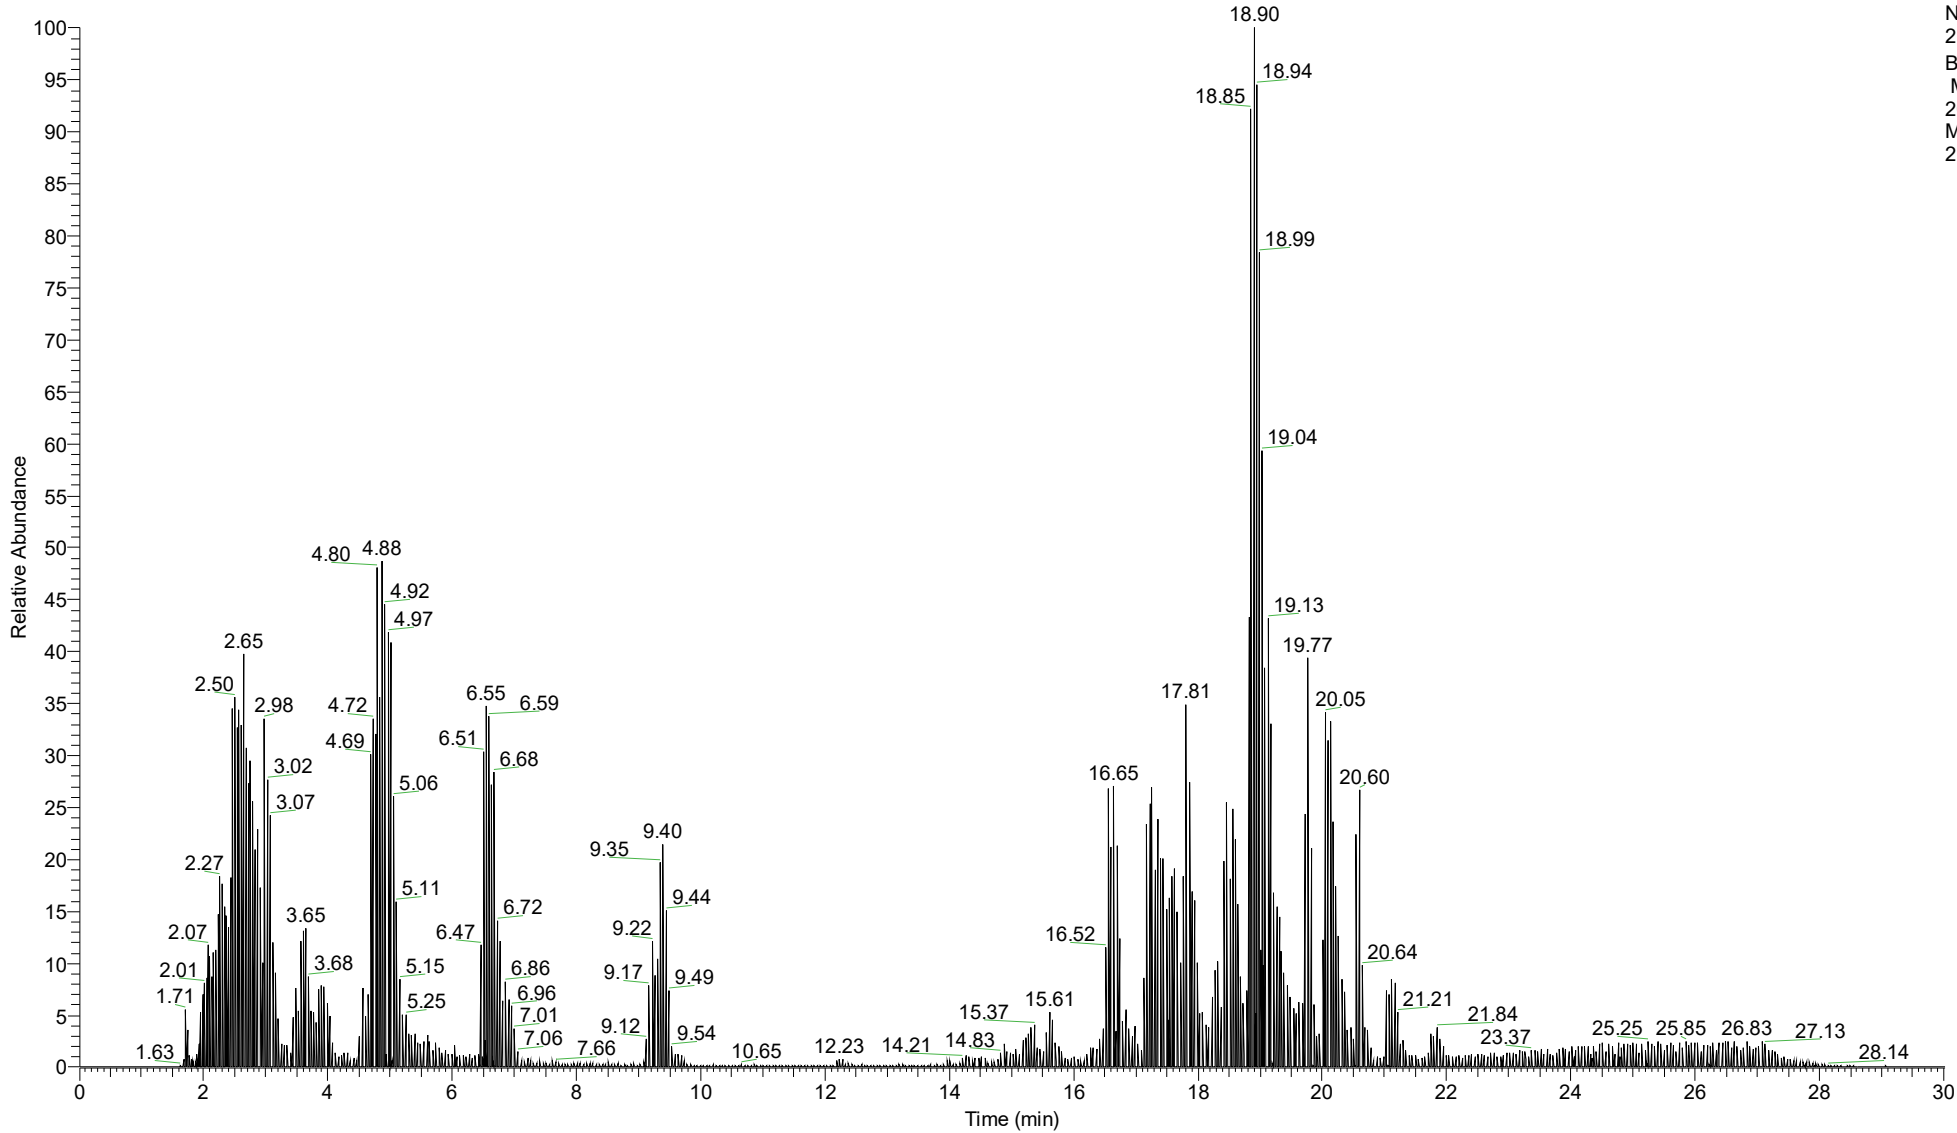

NL:  
2.85E9  
Base Peak  
MS  
20201007\_  
Multi\_lipid1-  
2

(A)80%methanol-3

RT: 0.00 - 30.01

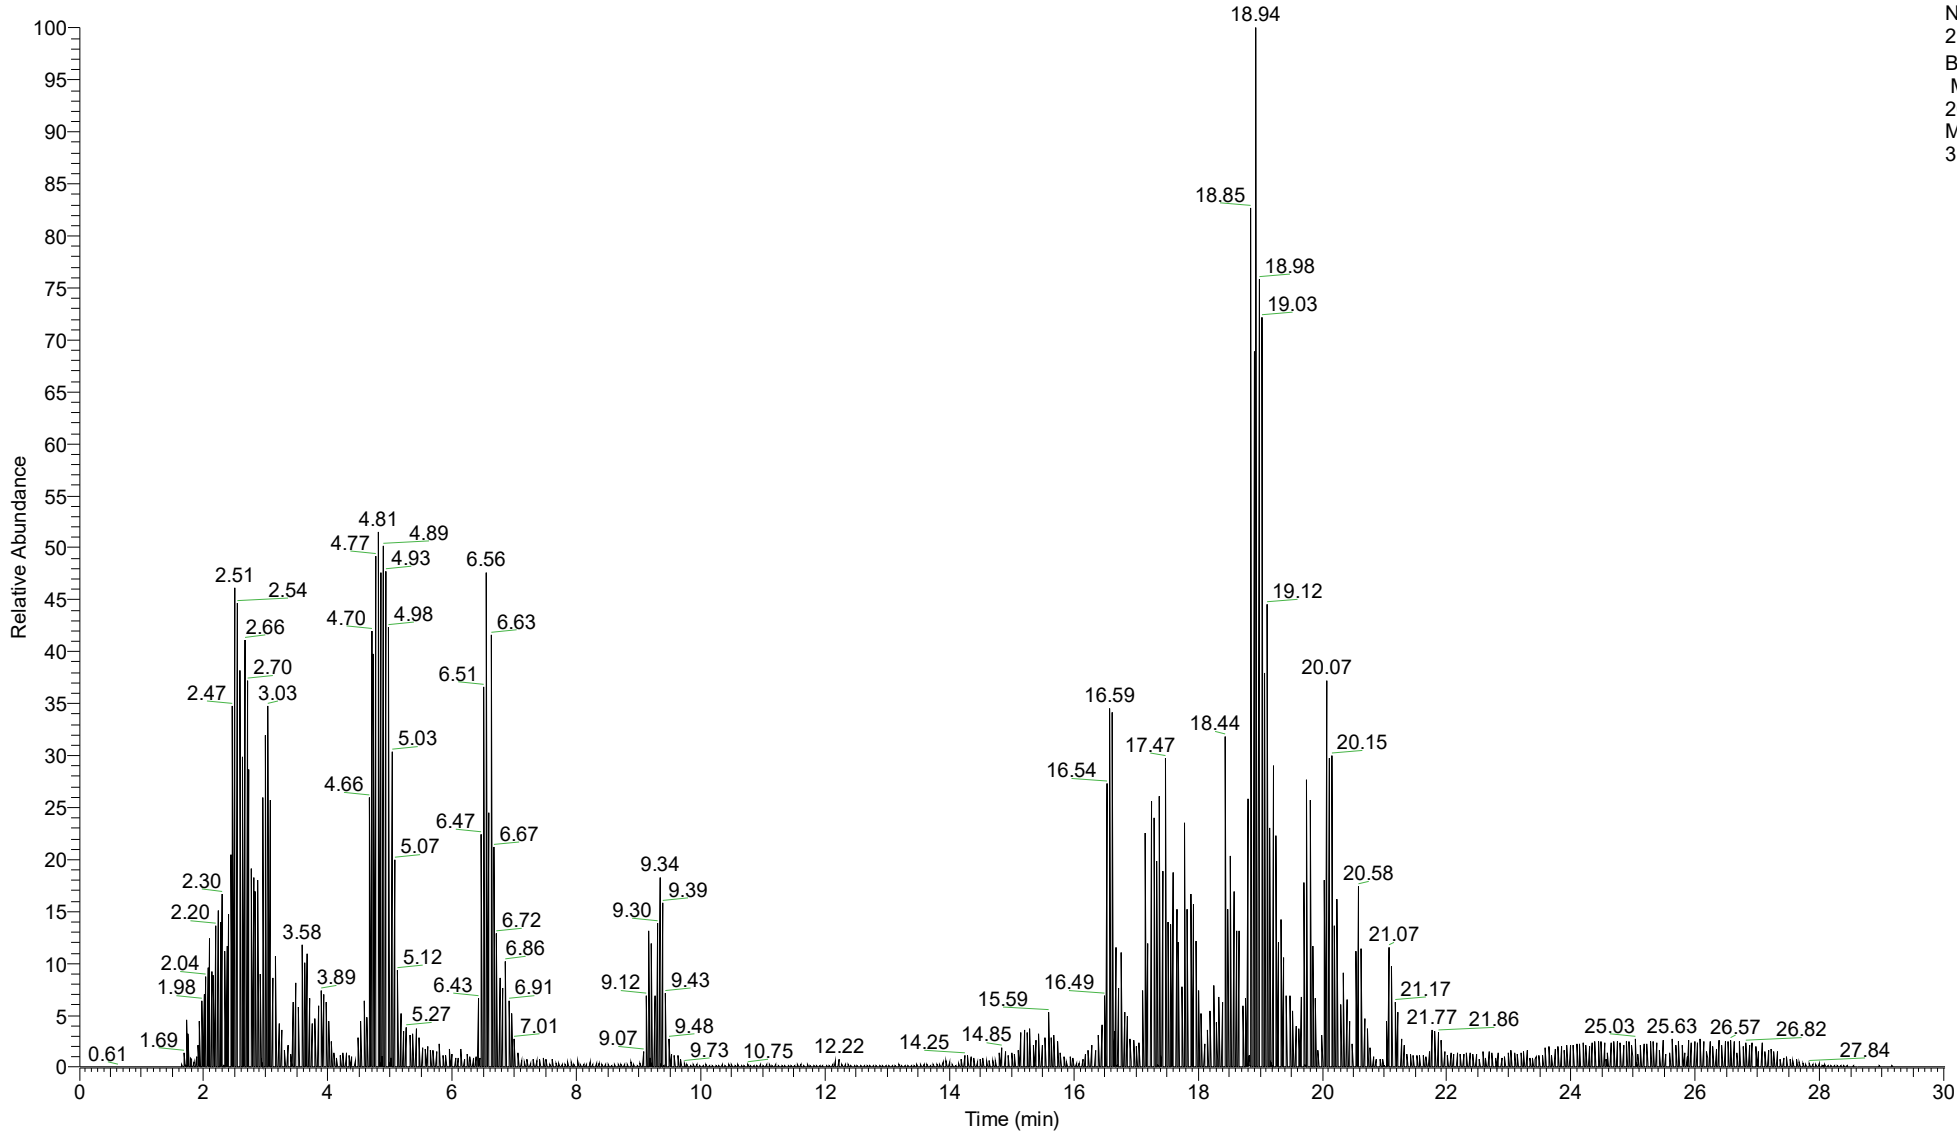

NL:  
2.81E9  
Base Peak  
MS  
20201007\_  
Multi\_lipid1-  
3

(B)Chloroform/methanol-1

RT: 0.00 - 30.01

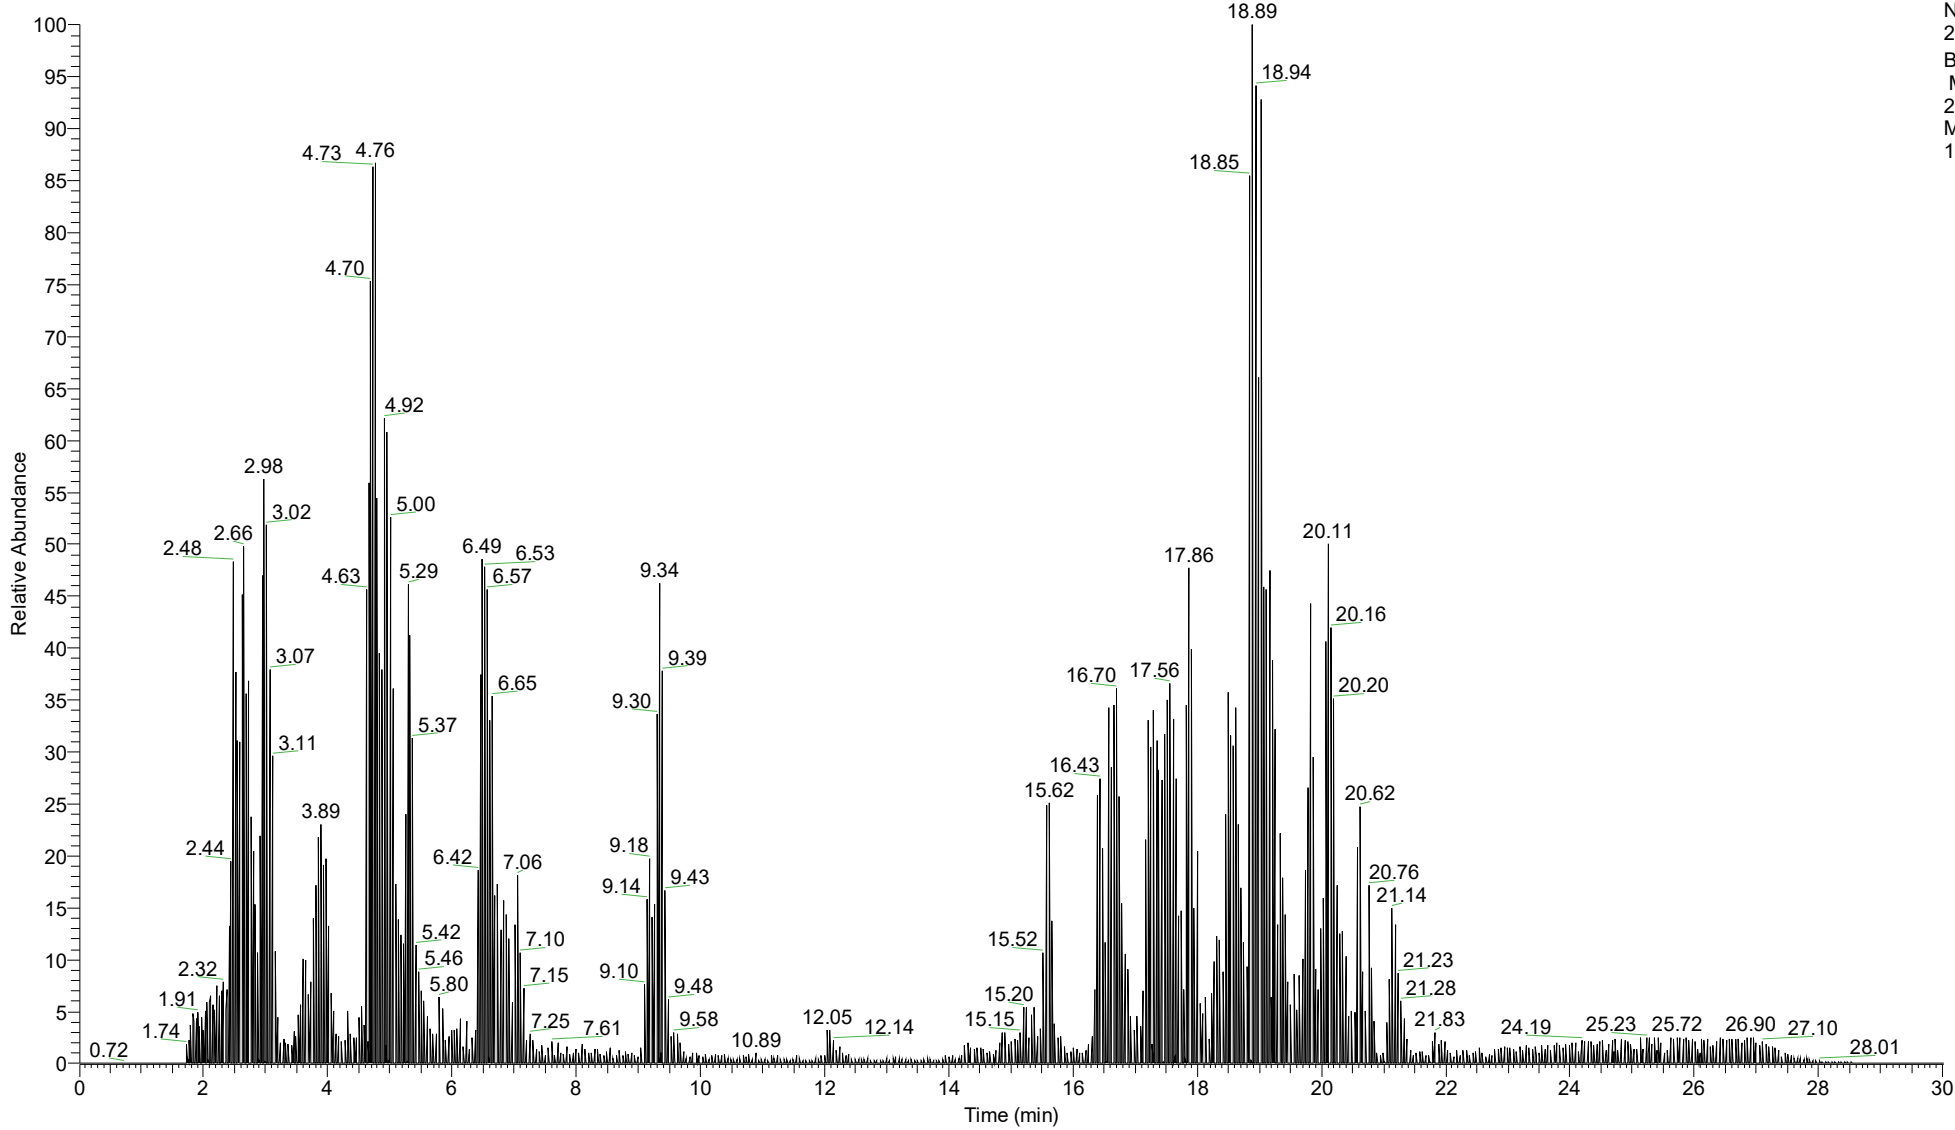

NL:  
2.88E9  
Base Peak  
MS  
20201007\_  
Multi\_lipid2-  
1

(B)Chloroform/methanol-2

RT: 0.00 - 30.01

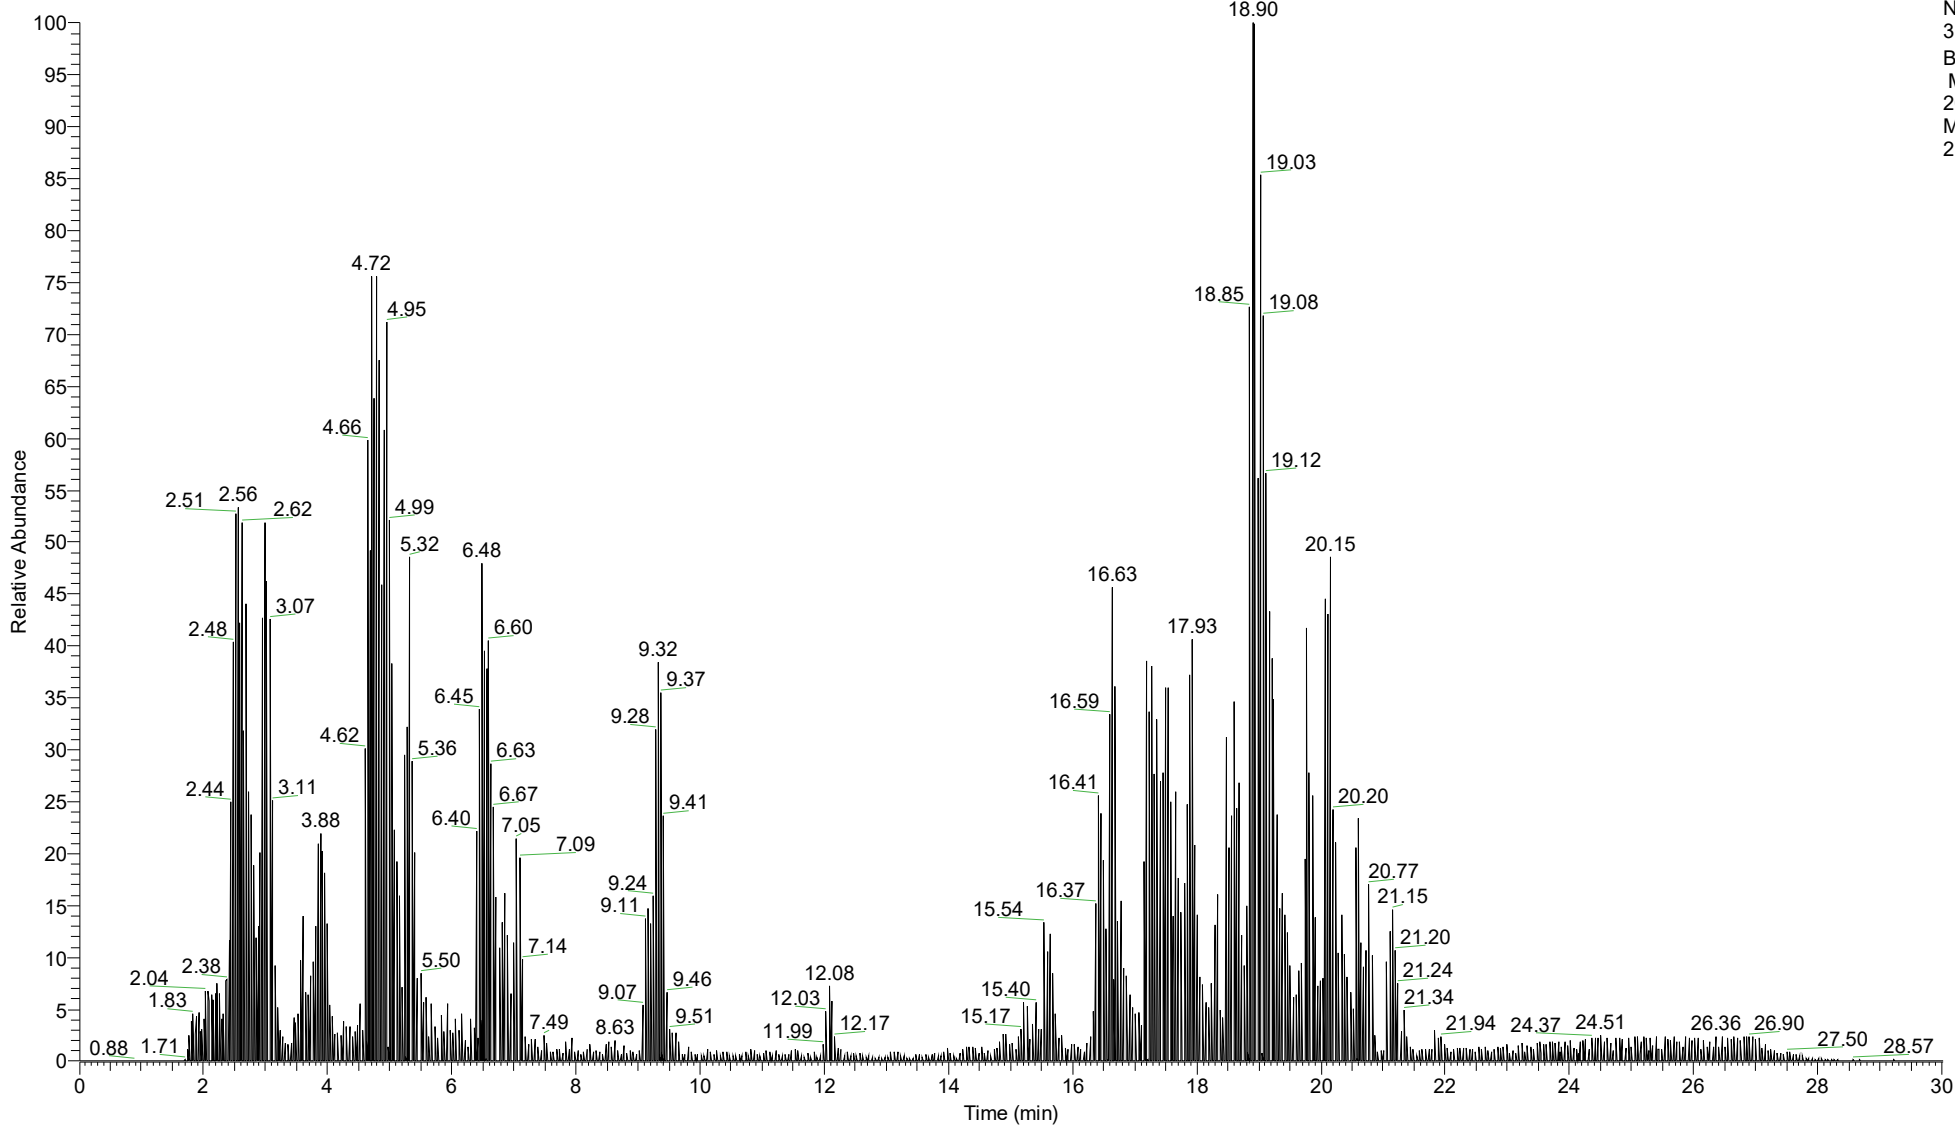

NL:  
3.00E9  
Base Peak  
MS  
20201007\_  
Multi\_lipid2-  
2

(B)Chloroform/methanol-3

RT: 0.00 - 30.01

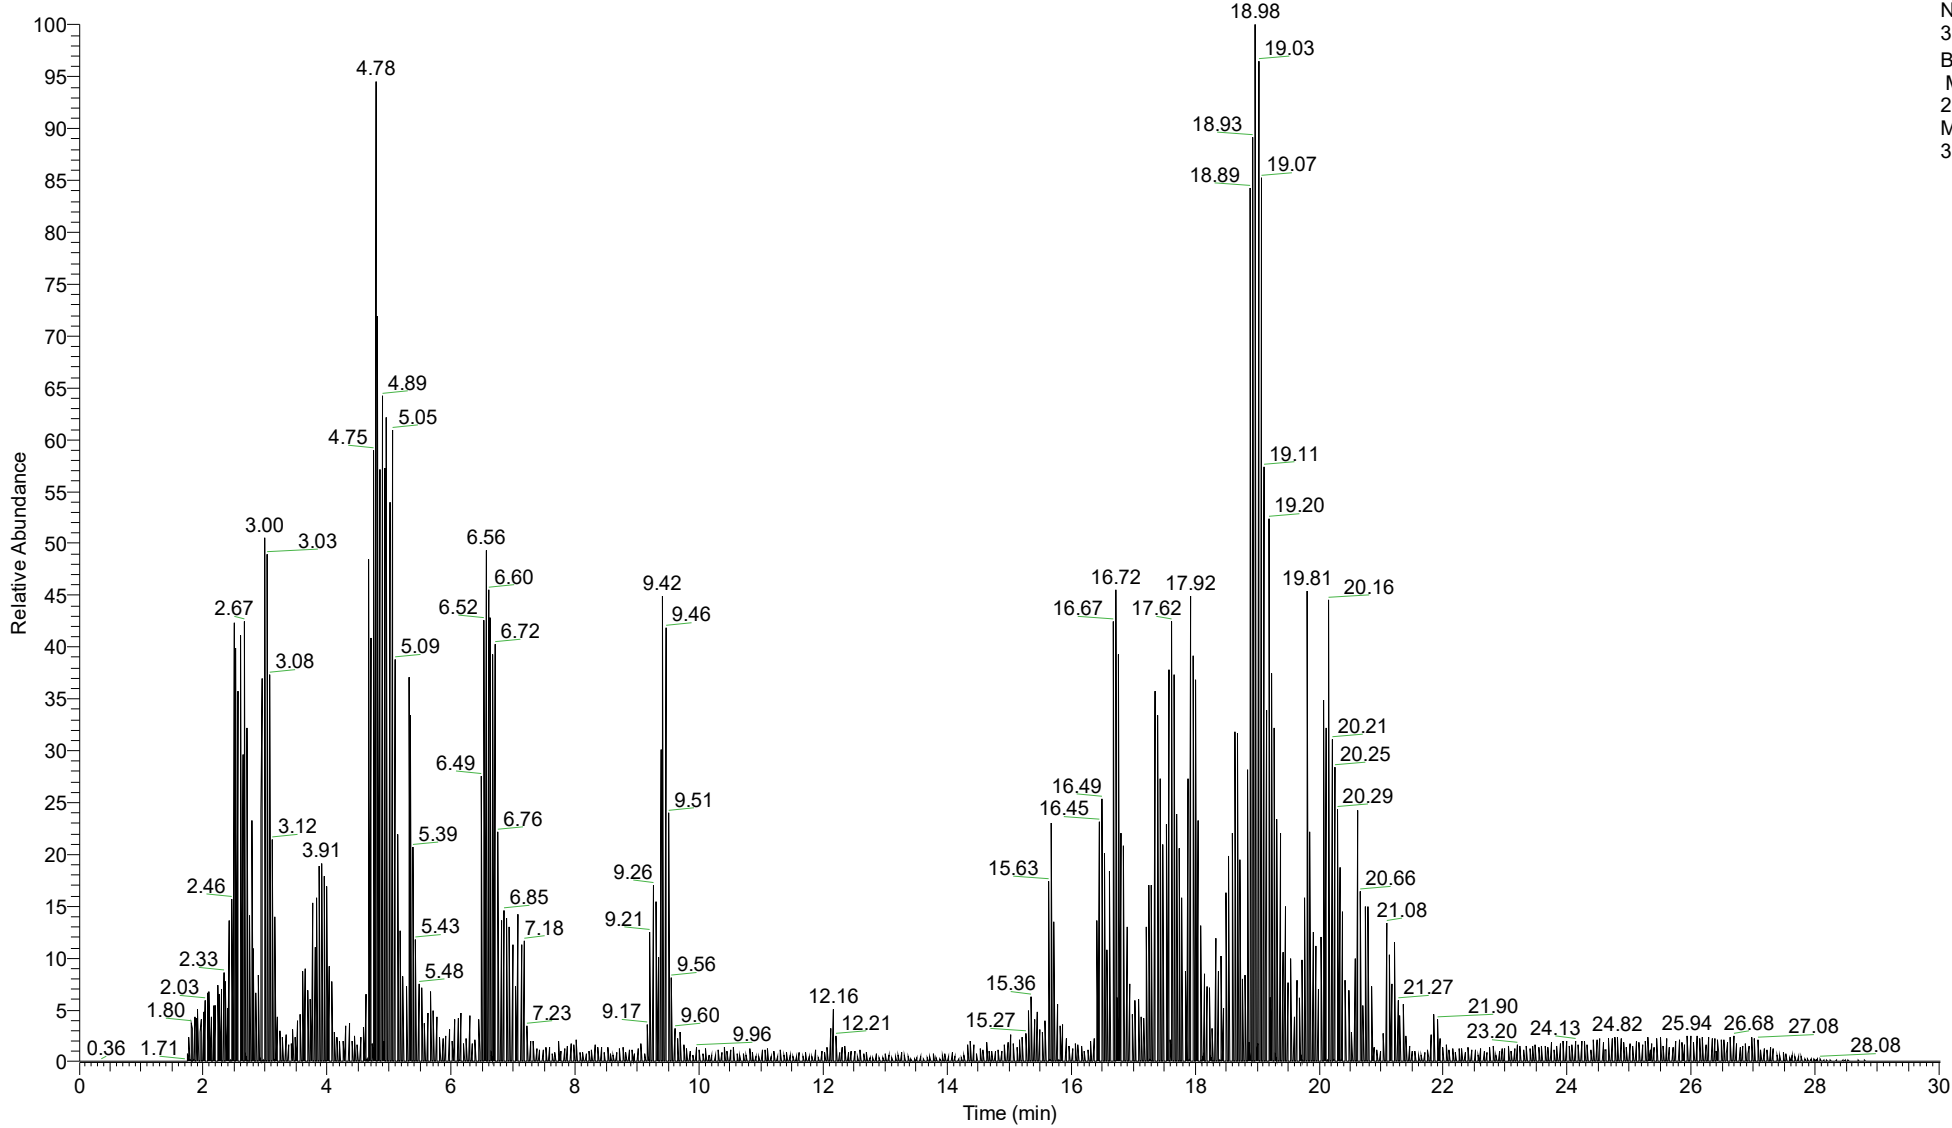

NL:  
3.09E9  
Base Peak  
MS  
20201007\_  
Multi\_lipid2-  
3

(C)MTBE-1

RT: 0.00 - 30.01

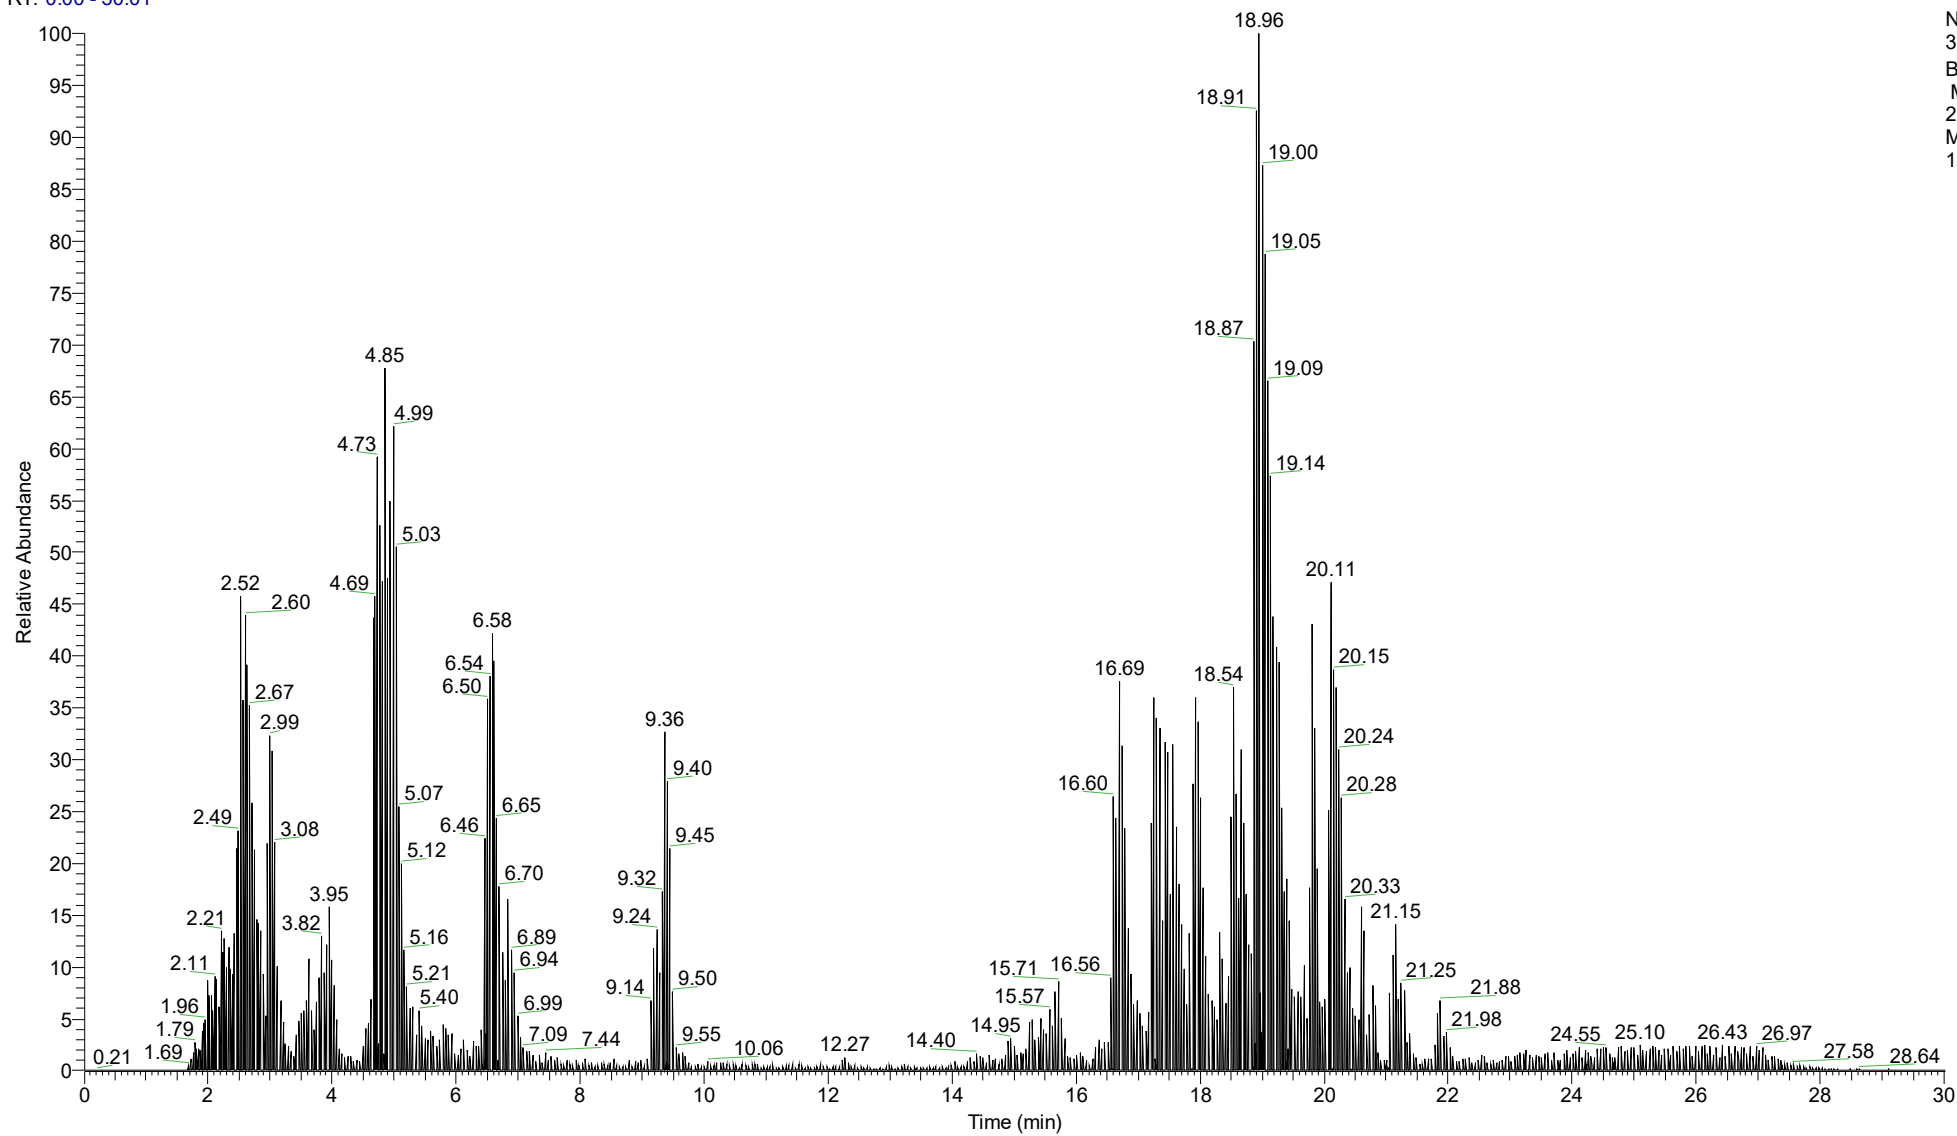

NL:  
3.08E9  
Base Peak  
MS  
20201007\_  
Multi\_lipid3-  
1

(C)MTBE-2

RT: 0.00 - 30.01

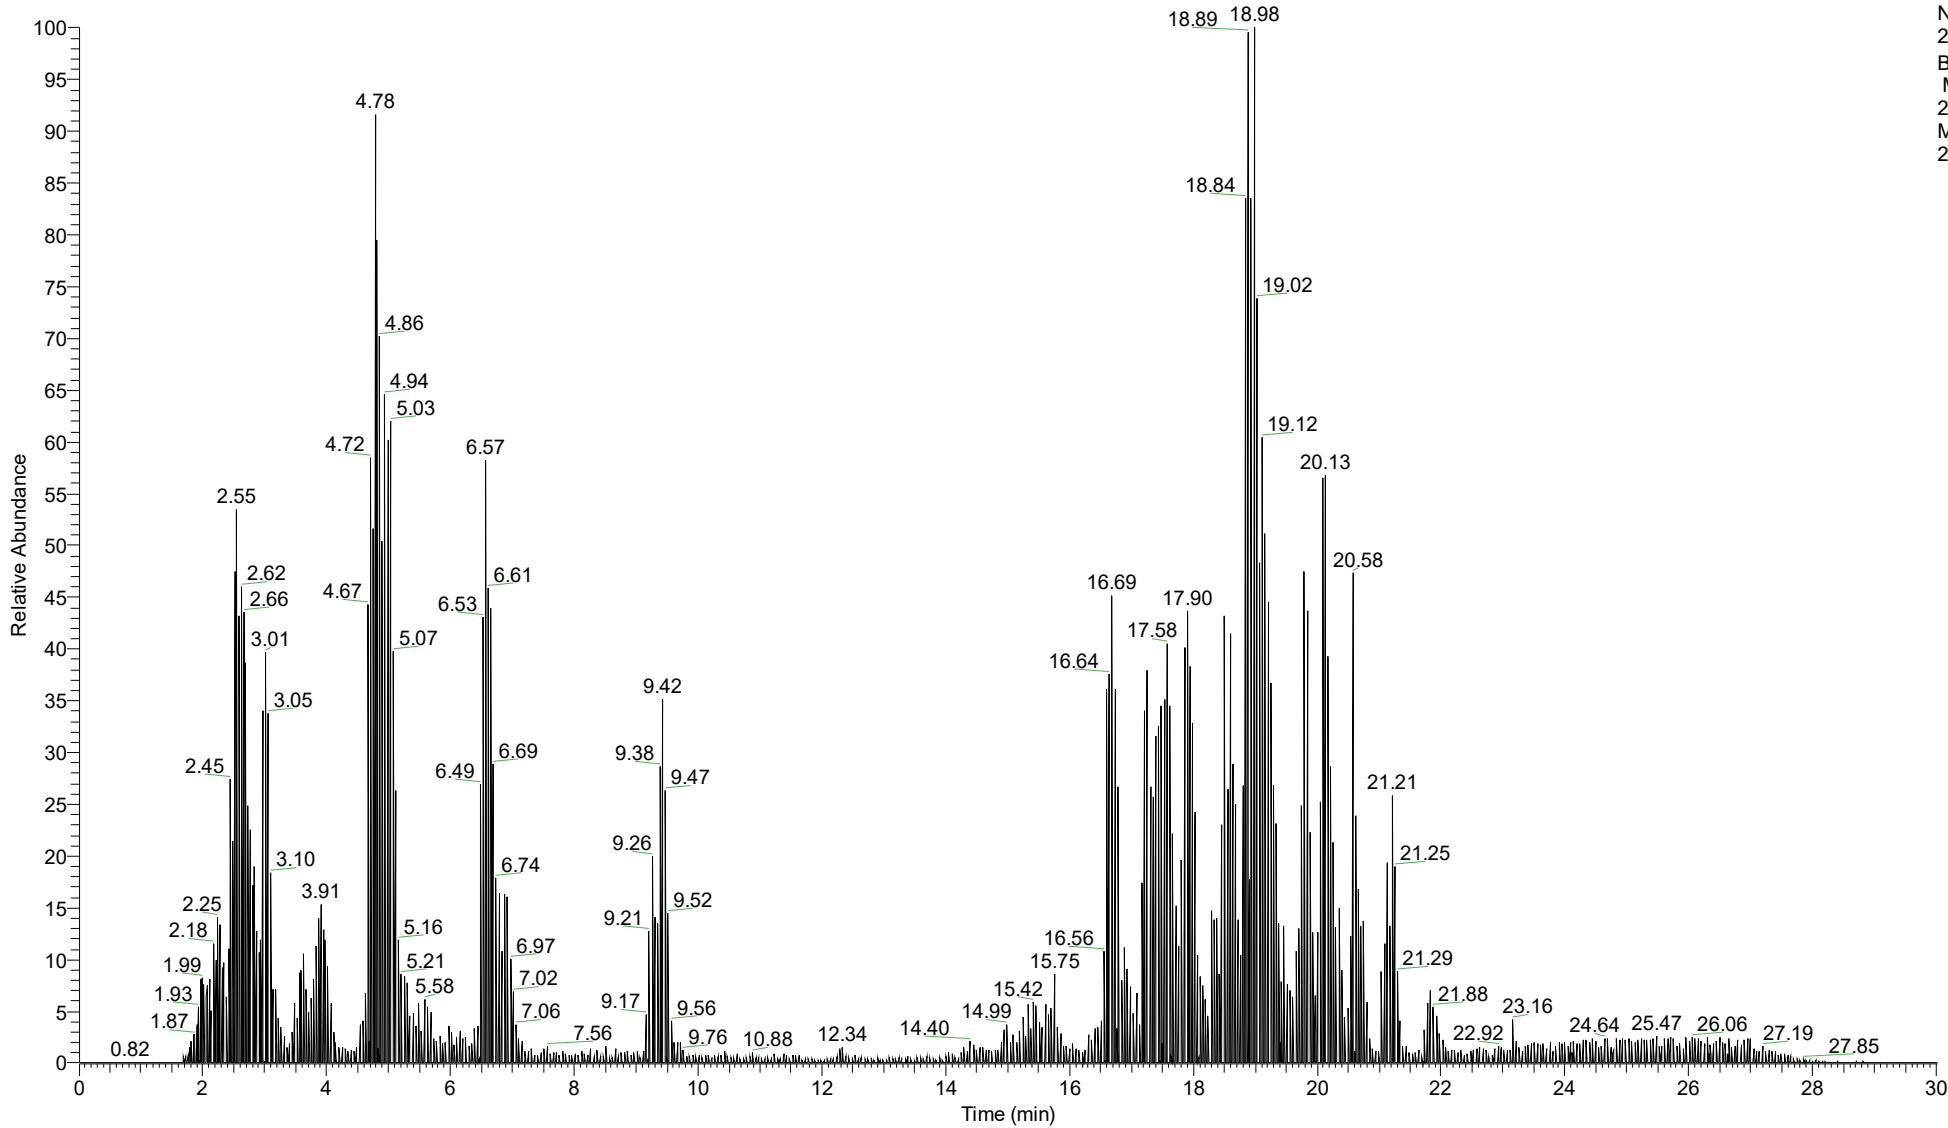

NL:  
2.86E9  
Base Peak  
MS  
20201007\_  
Multi\_lipid3-  
2



(C)MTBE-3

RT: 0.00 - 30.01

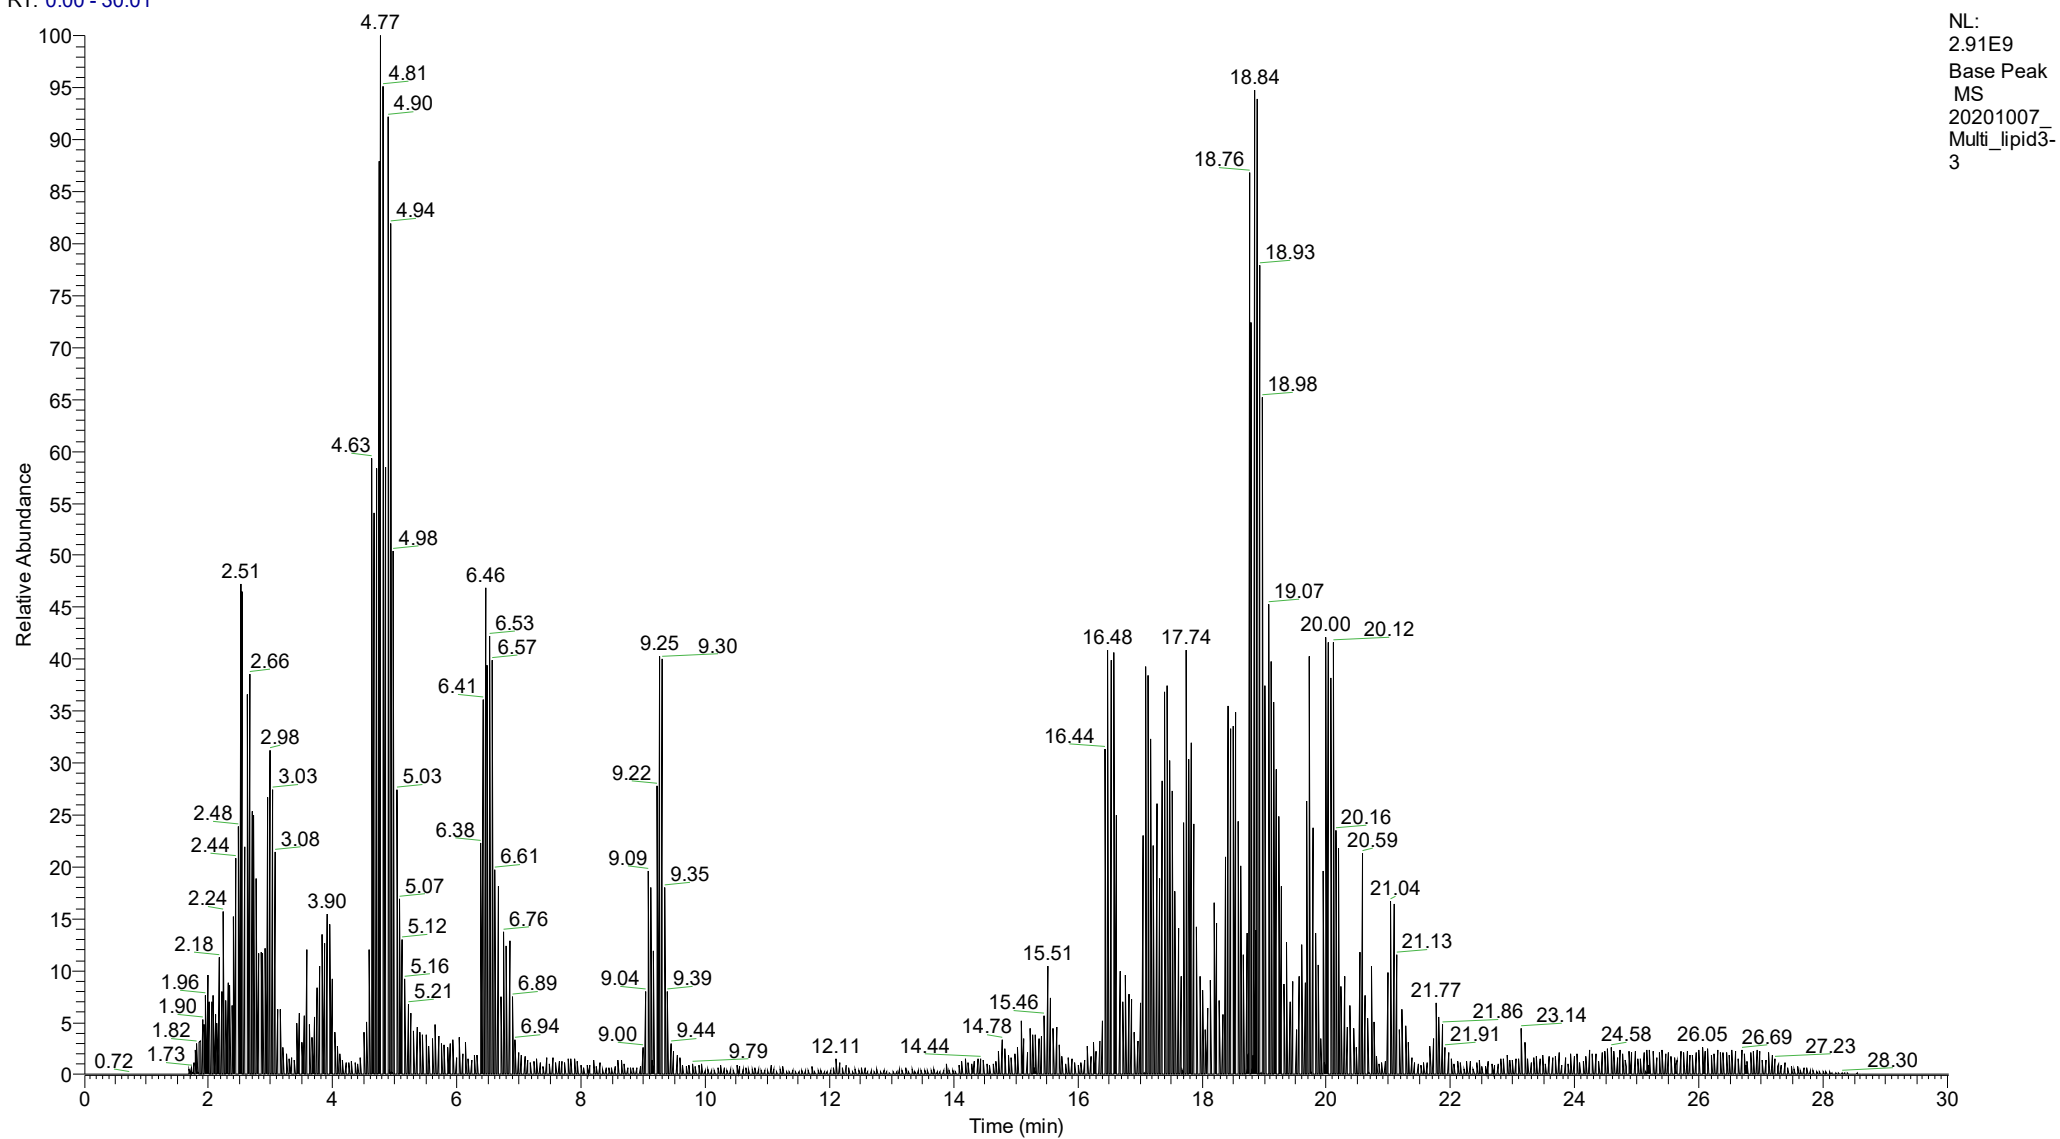

Figure S6 Chromatogram of lipidomics data of each method.

(A)

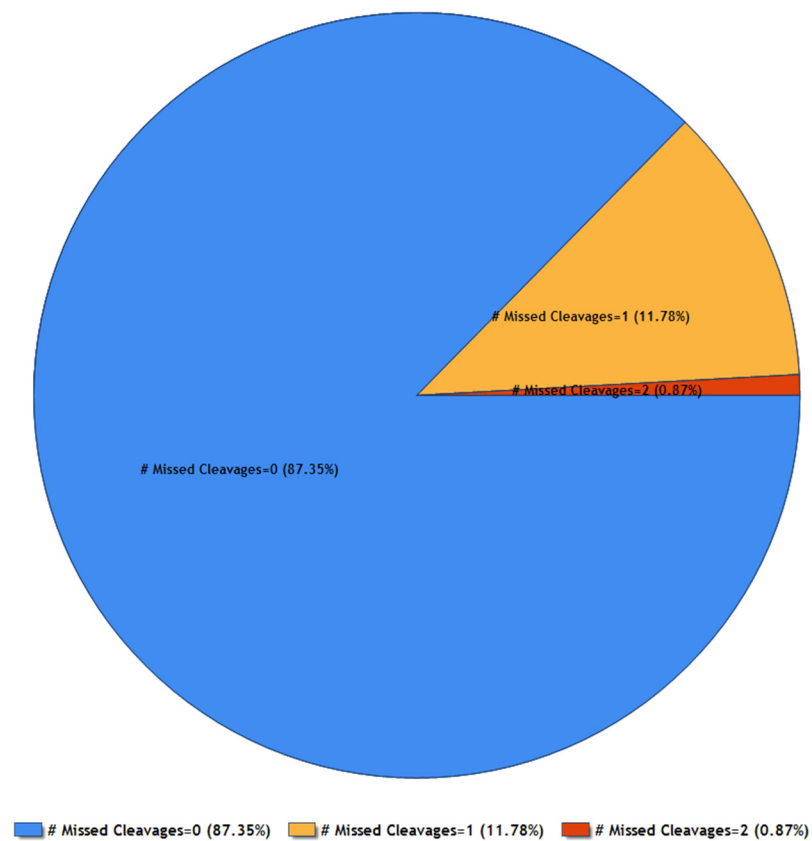

(B)

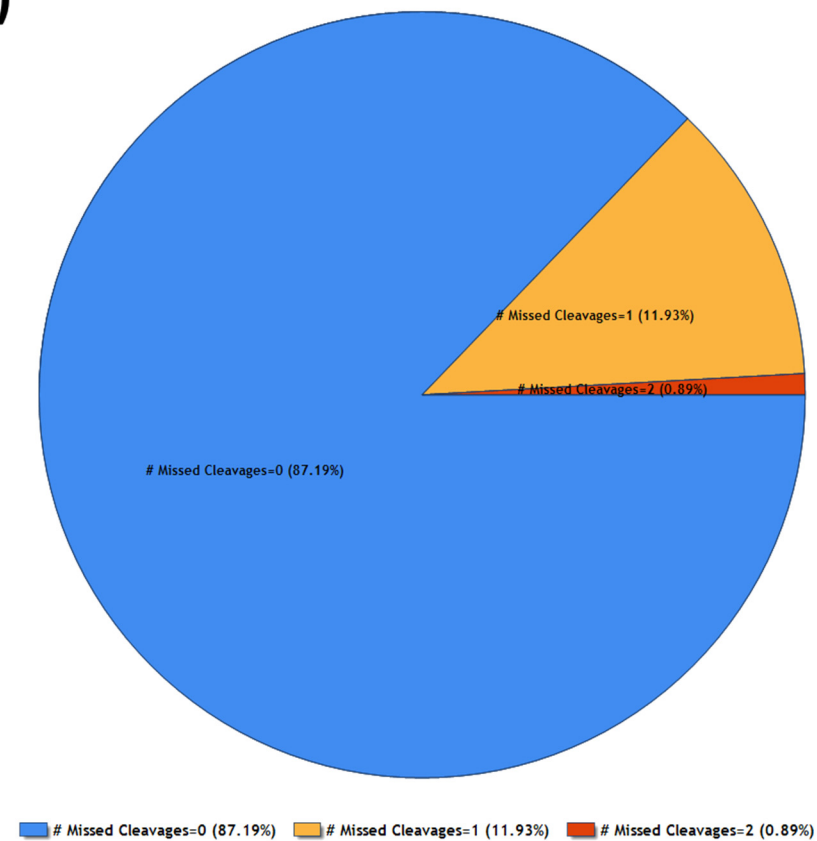

(C)

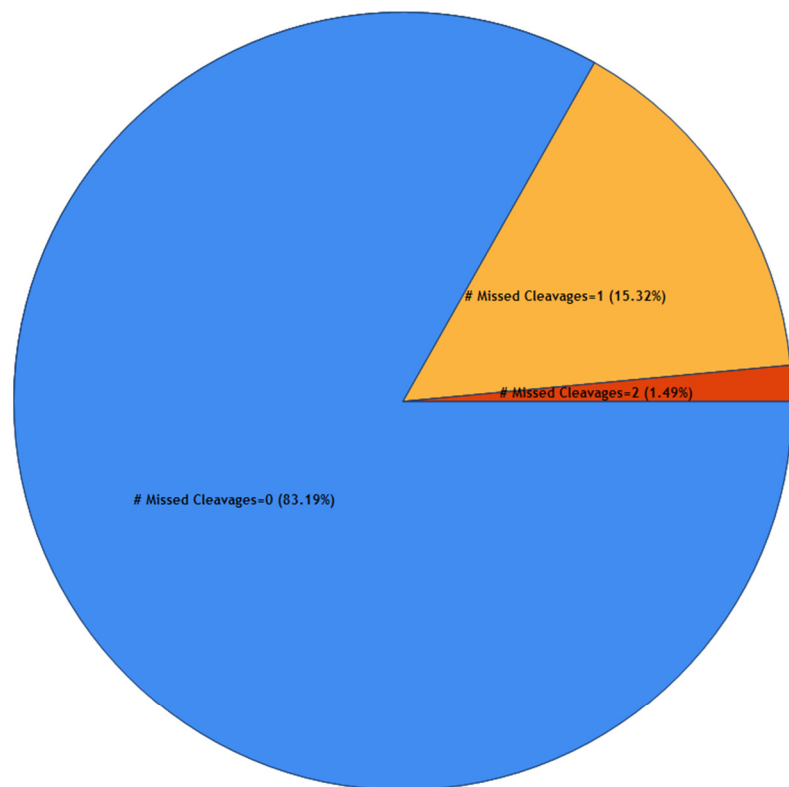

# Missed Cleavages=0 (83.19%) # Missed Cleavages=1 (15.32%) # Missed Cleavages=2 (1.49%)

(D)

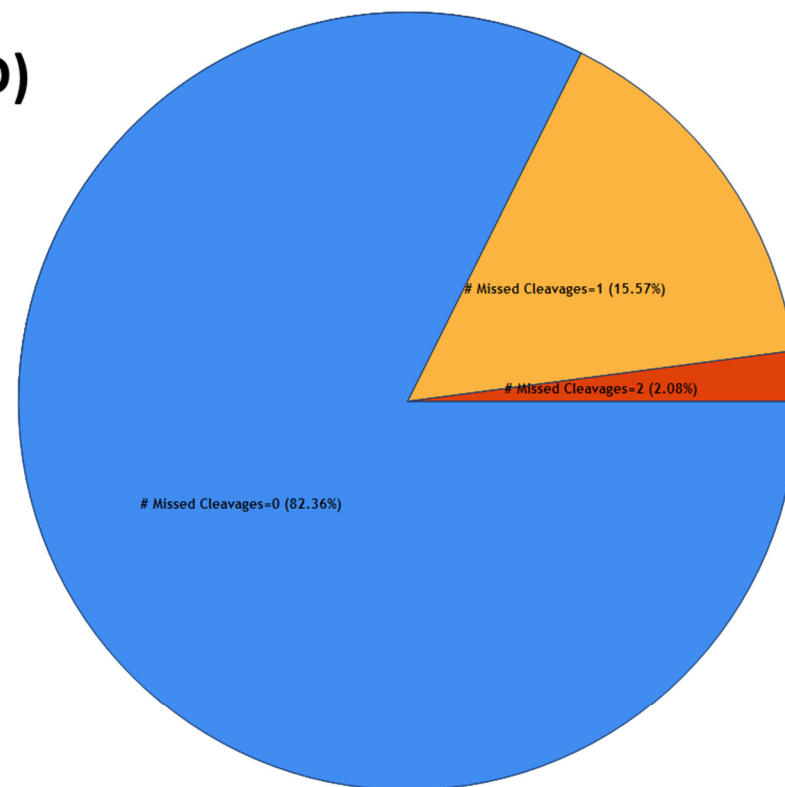

# Missed Cleavages=0 (82.36%) # Missed Cleavages=1 (15.57%) # Missed Cleavages=2 (2.08%)

(E)

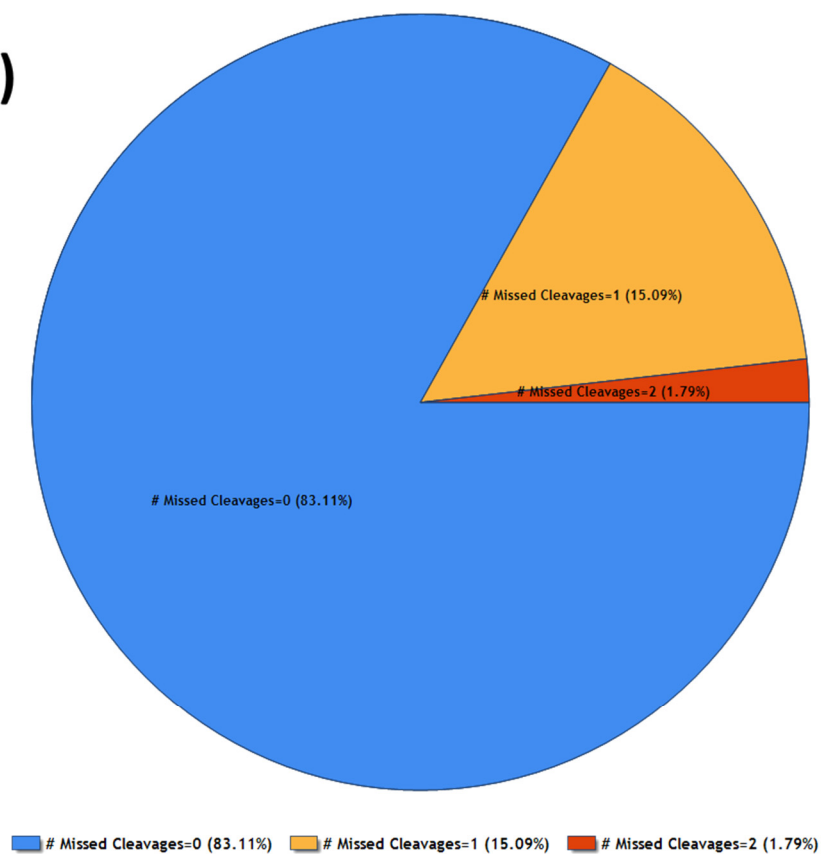

(F)

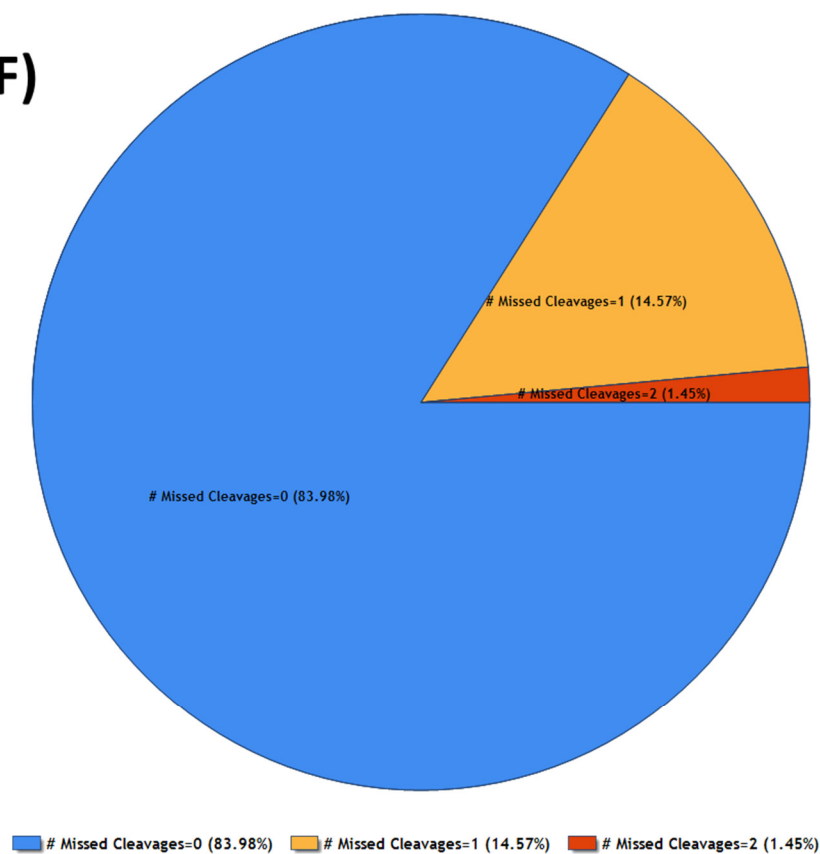

**Figure S7** Number of missed cleavages in identified peptides. (A) FASP\_80methanol, (B) FASP\_Chloroform/methanol, (C) FASP\_MTBE, (D) S-trap\_80methanol, (E) S-trap\_Chloroform/methanol, (F) S-trap\_MTBE

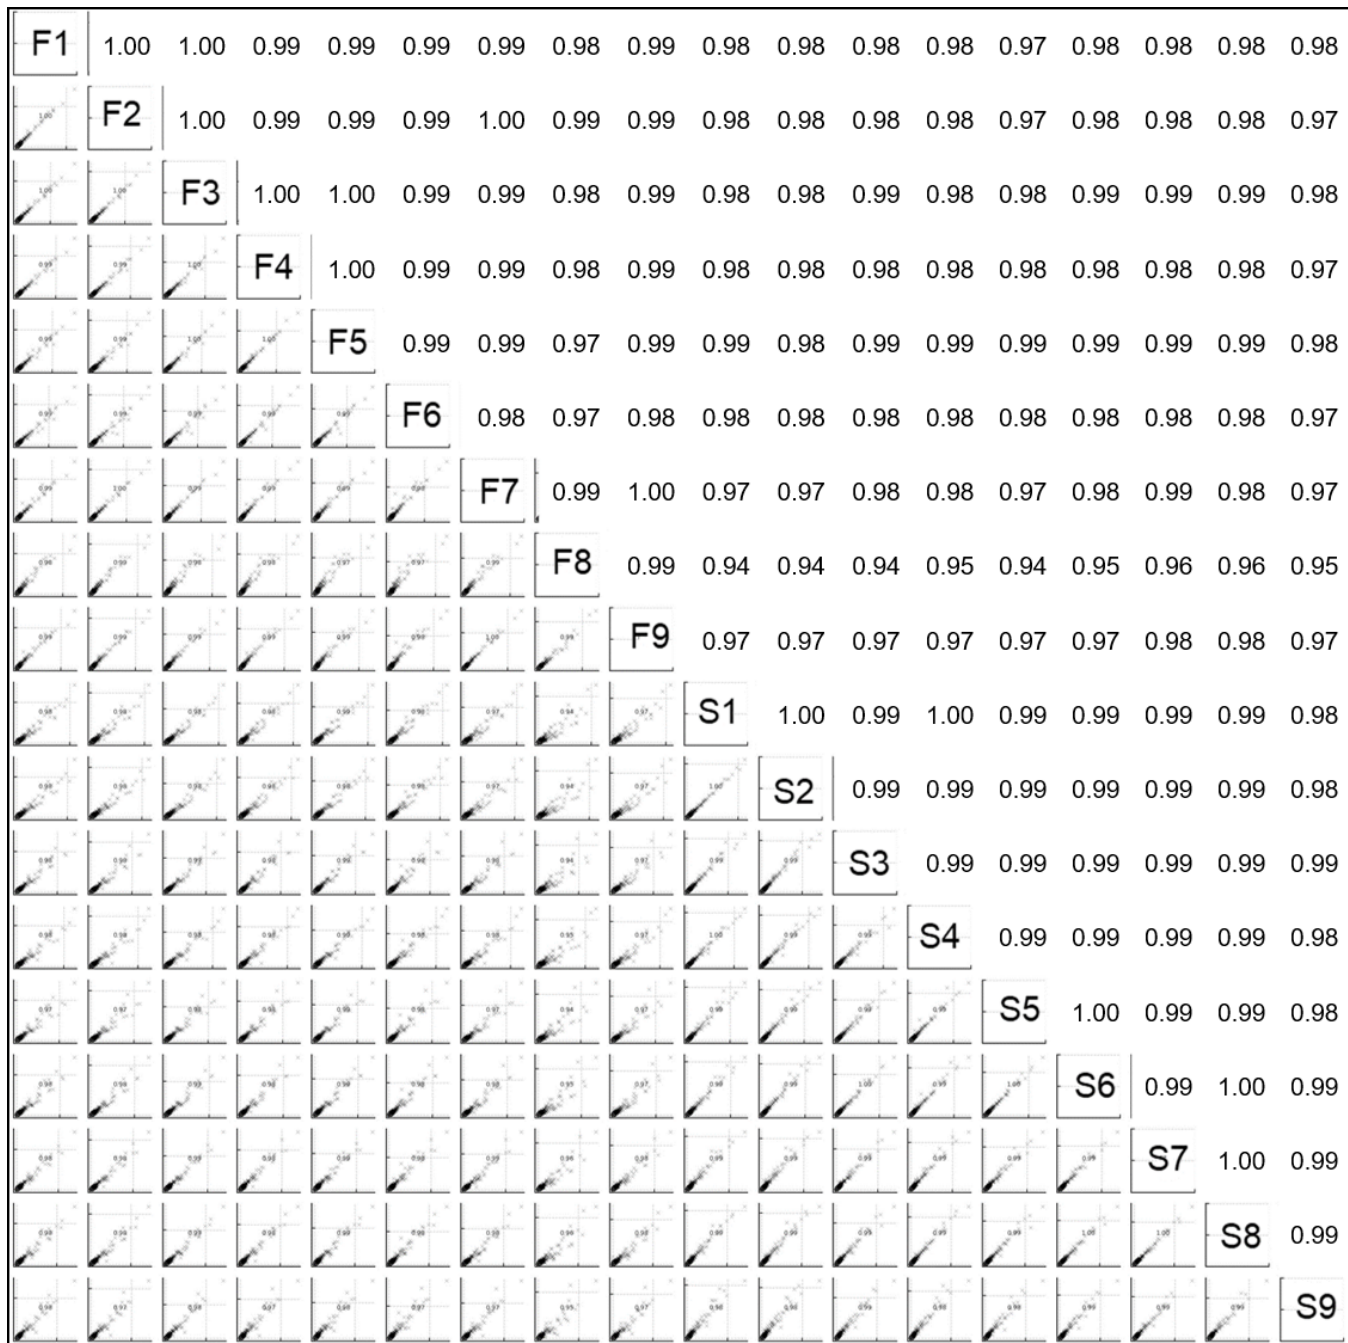

Figure S8 Correlation scatter plot in proteomics data

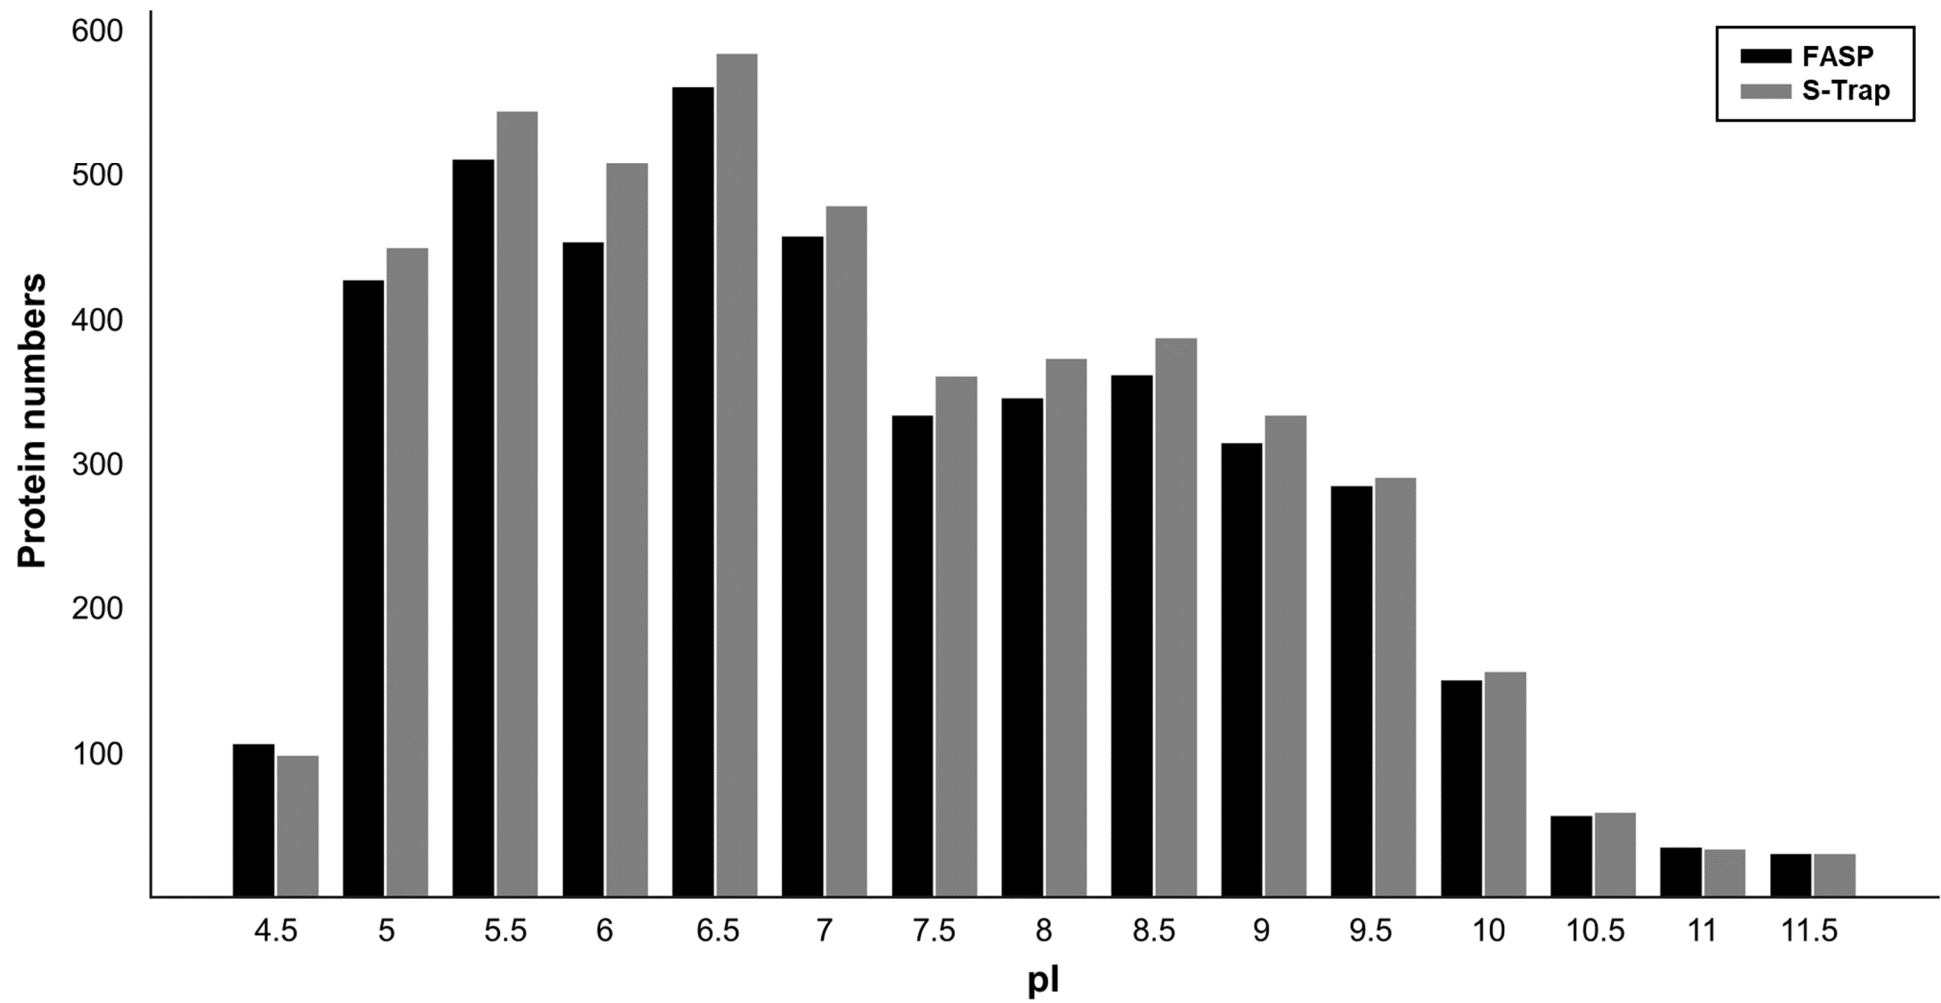

Figure S9. Histogram of pI(isoelectric points)

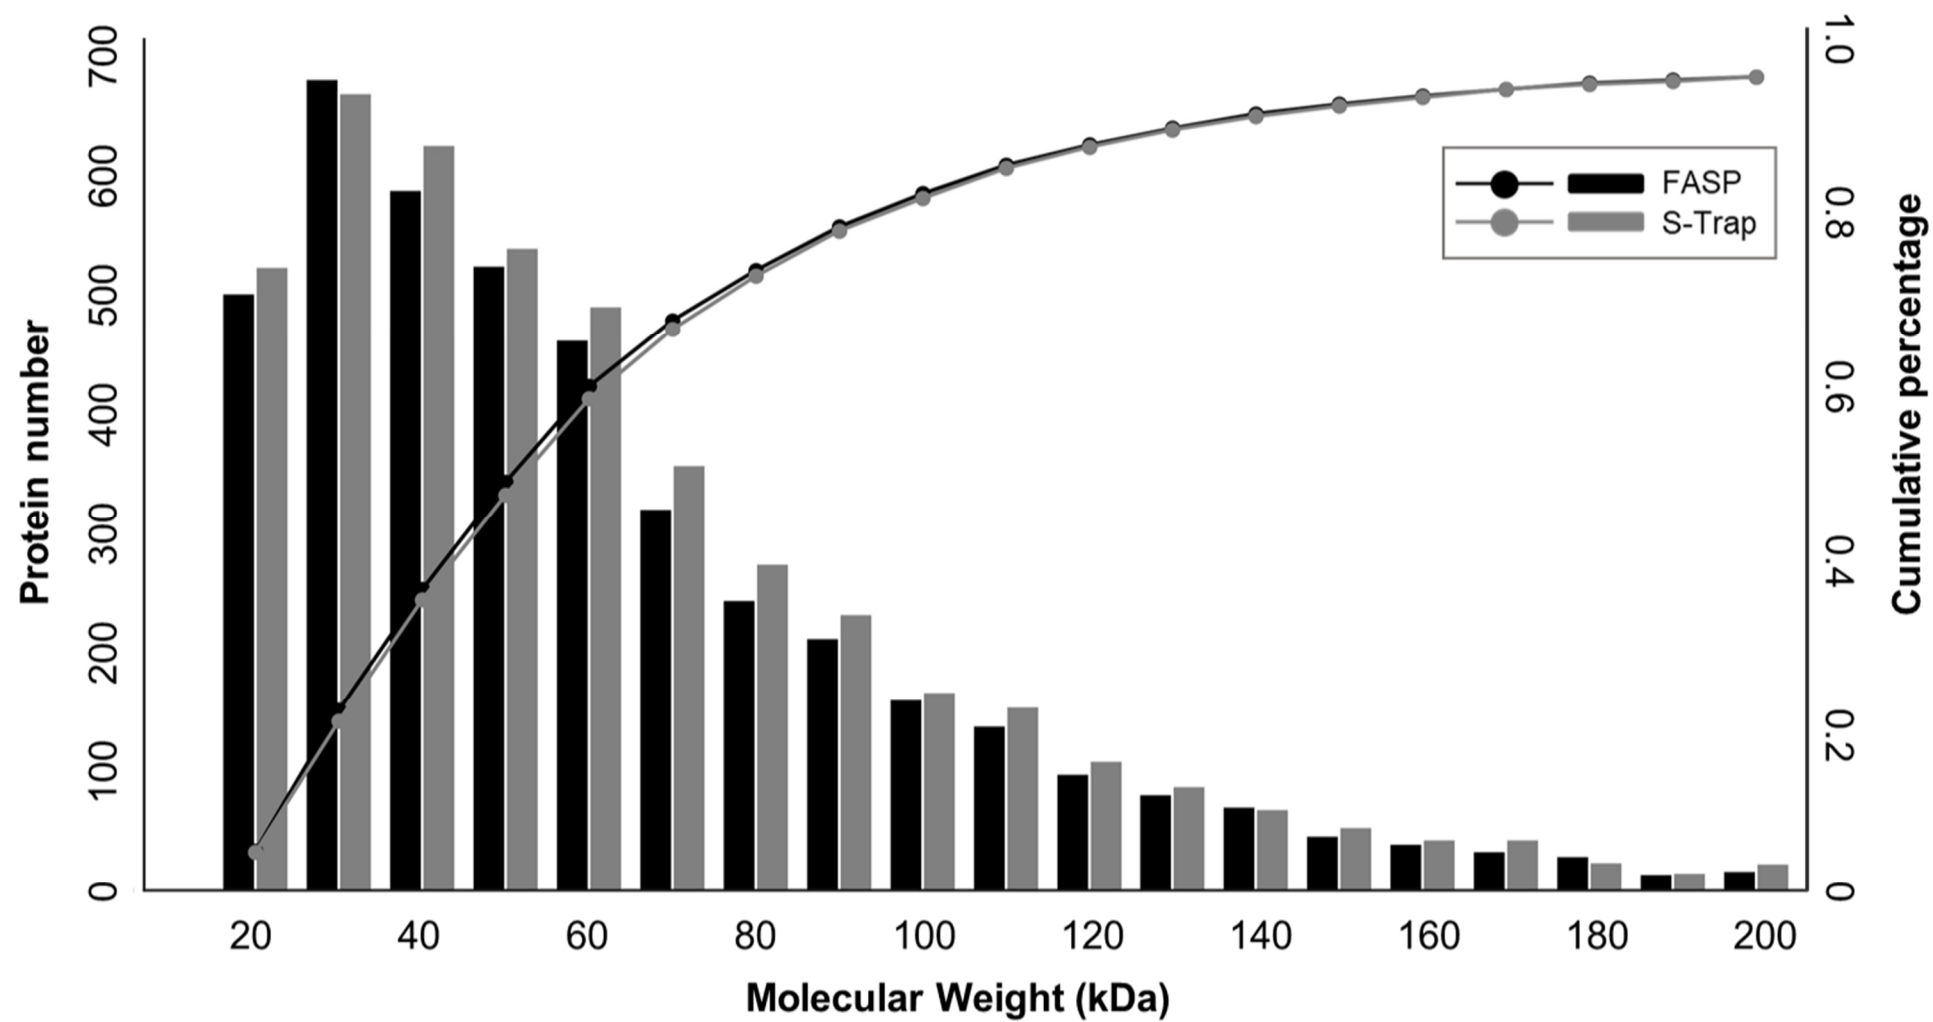

**Figure S10.** Histograms and cumulative distributions of molecular weight(MW)

| FASP/S-Trap | log2(FC) | raw.pval   | Gene name | Discription                              |
|-------------|----------|------------|-----------|------------------------------------------|
| Q71DI3      | 2.079    | 1.58E-07   | H3C15     | Histone H3.2                             |
| Q9BW91      | -1.0016  | 0.00020524 | NUDT9     | ADP-ribose pyrophosphatase mitochondrial |
| Q7Z417      | -1.075   | 0.0067655  | NUDT9     | FMR1-interacting protein NUFIP2          |

**Table S2.** Fold change and p-value of Q71DI3, Q9BW91, Q7Z417
